# Supplementary material for: Survey of genome sequences in a wild sweet potato, Ipomoea trifida (H. B. K.) G. Don
Source: PubMed Central journal article supplement (PMC4401327; doi:10.1093/dnares/dsv002), 2015-03-24

# ltr\_sc000010.1

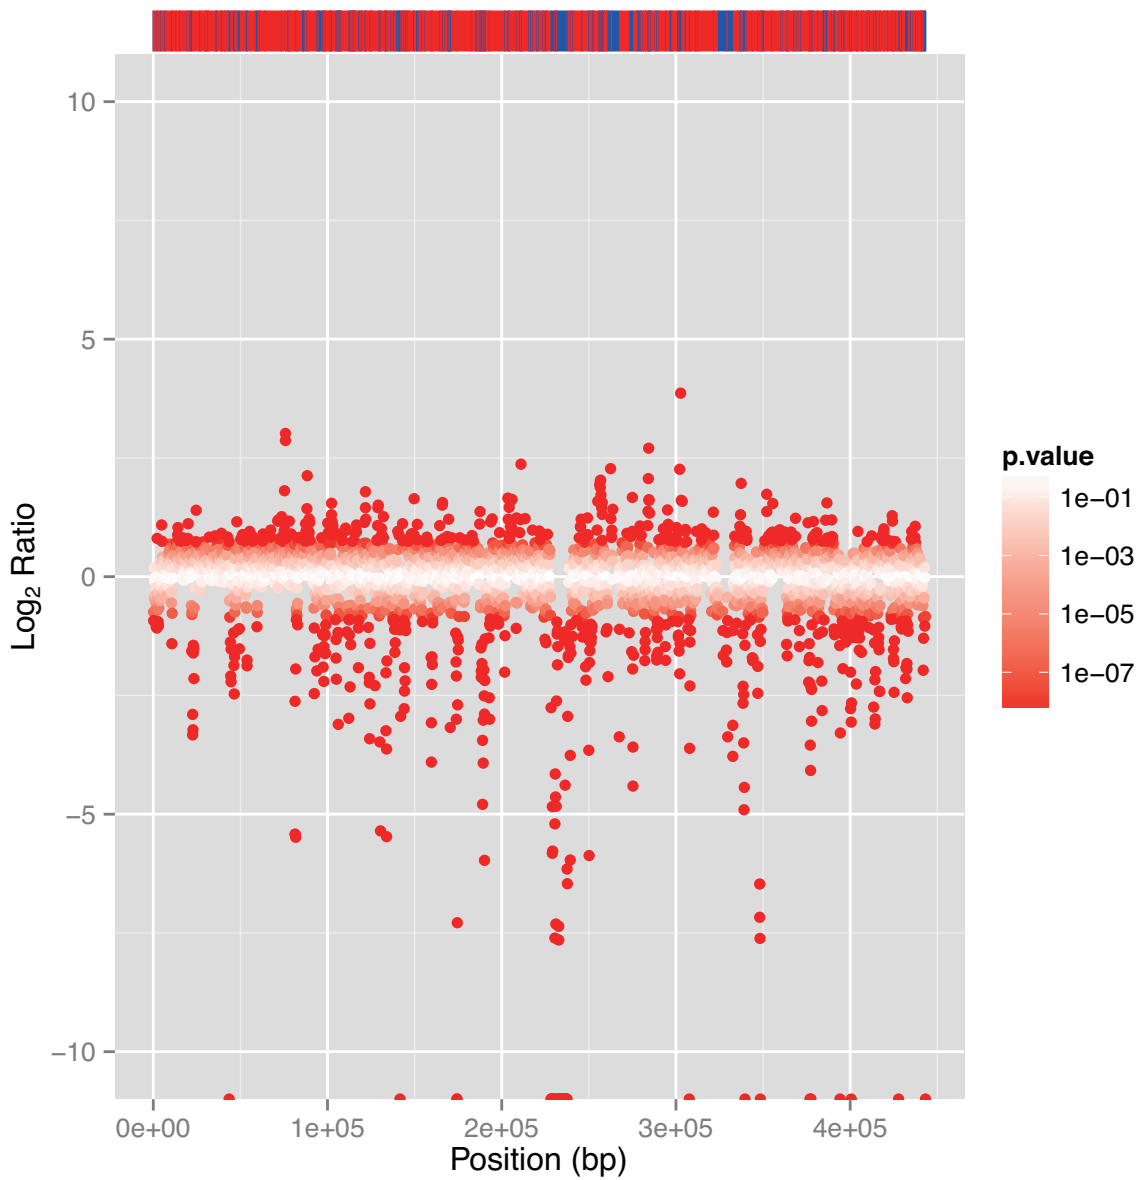

# ltr\_sc000013.1

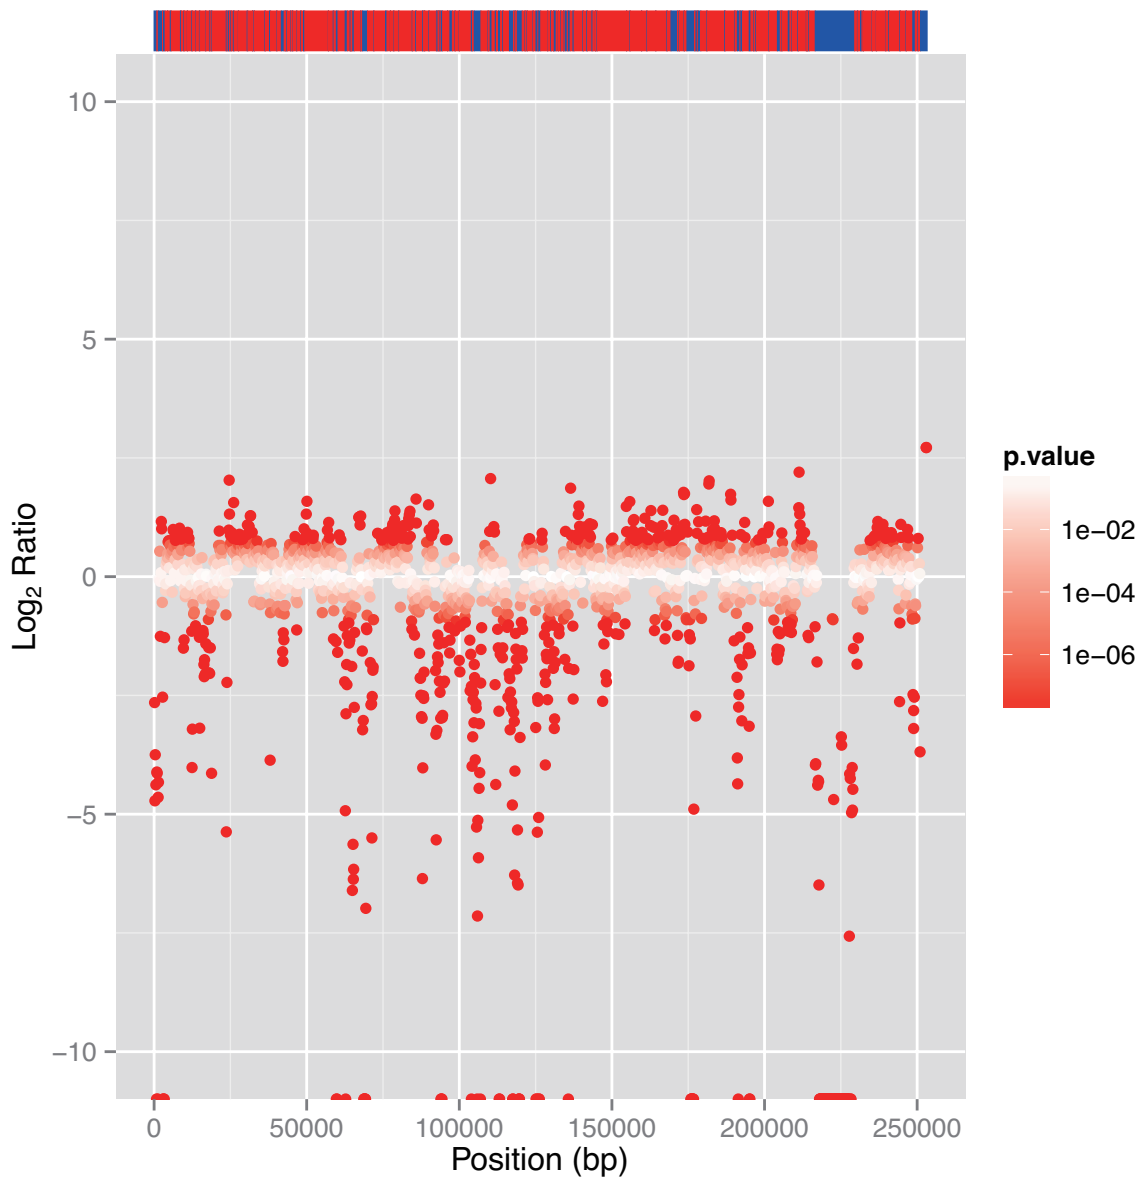

# ltr\_sc000017.1

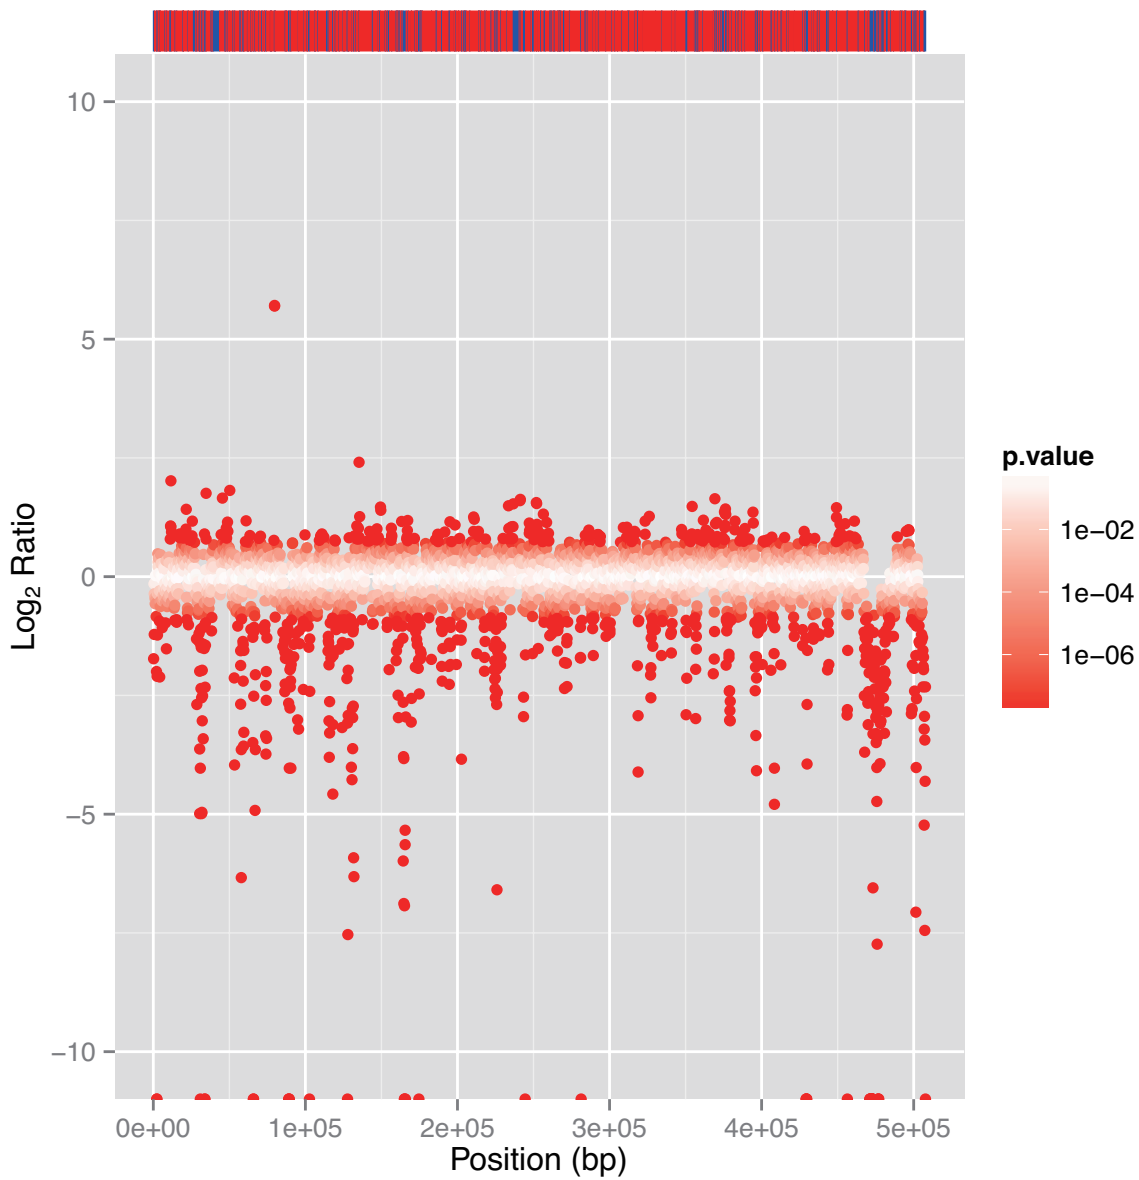

ltr\_sc000026.1

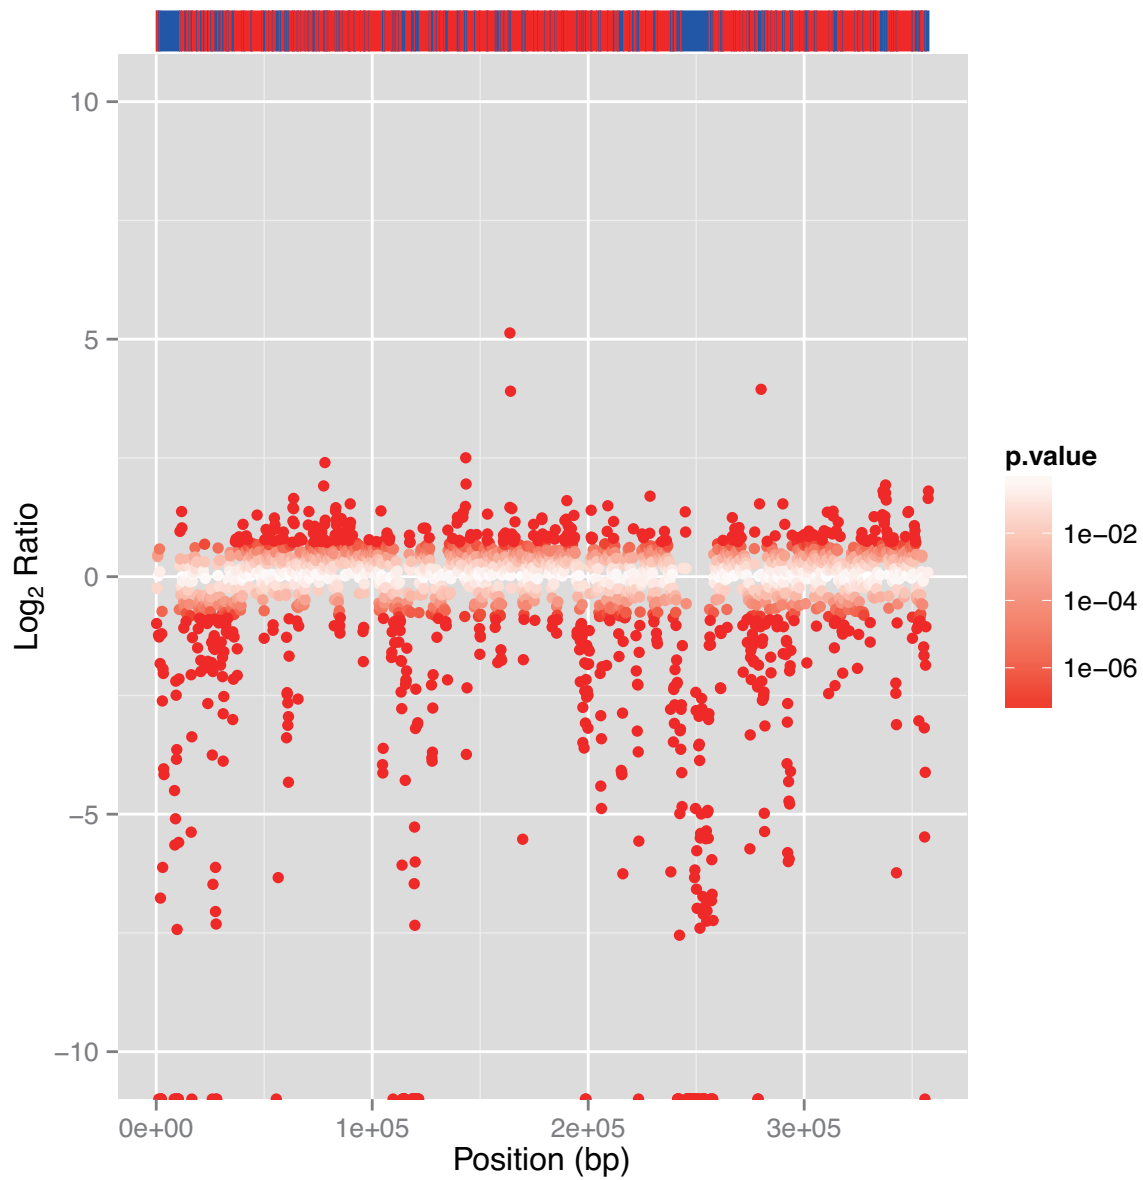

ltr\_sc000048.1

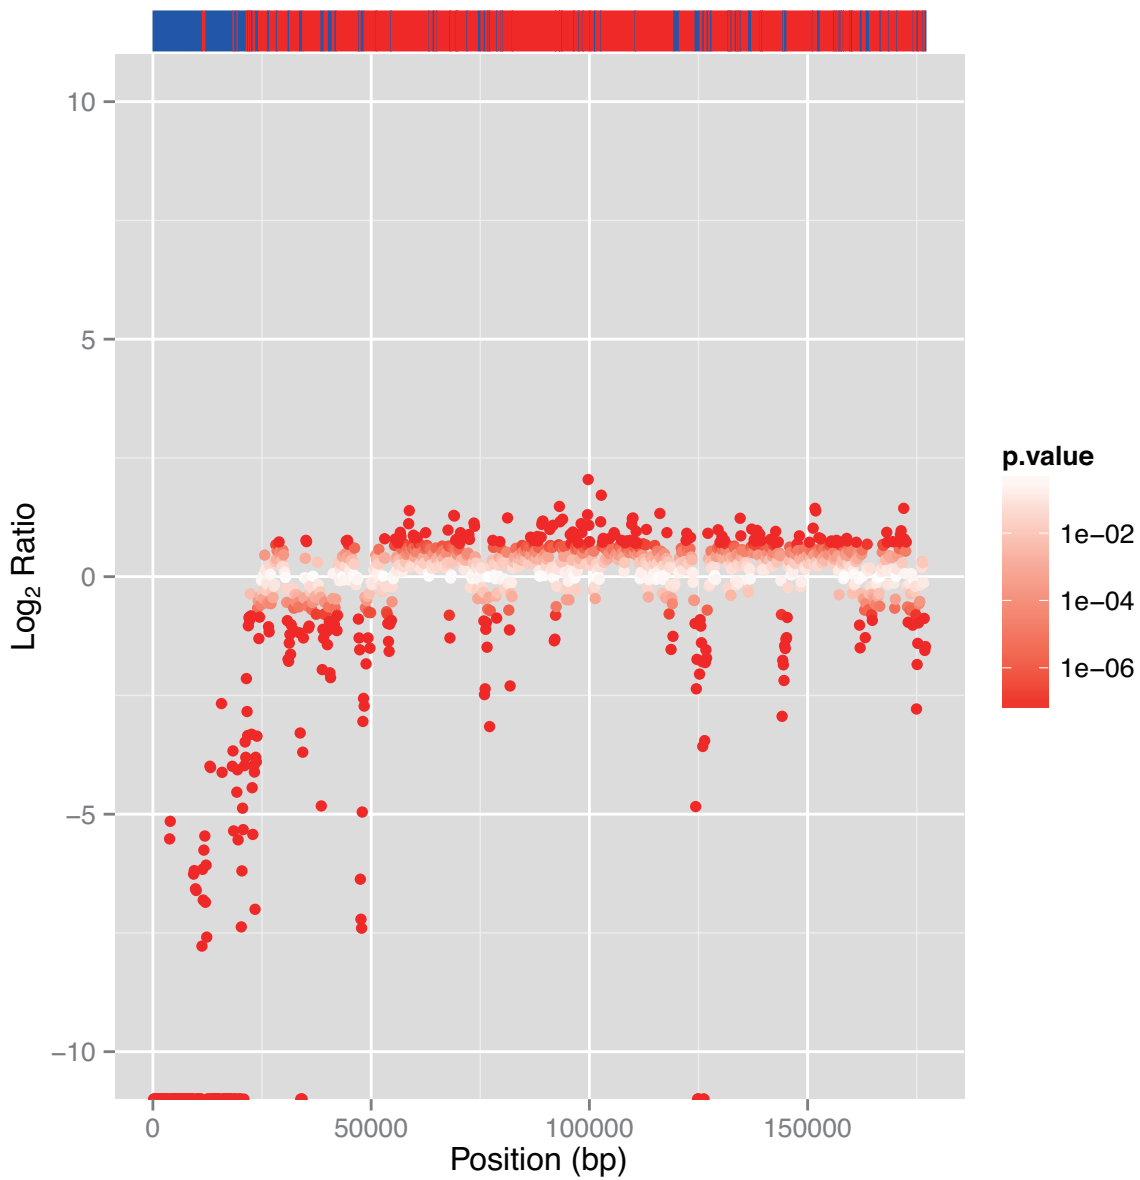

ltr\_sc000096.1

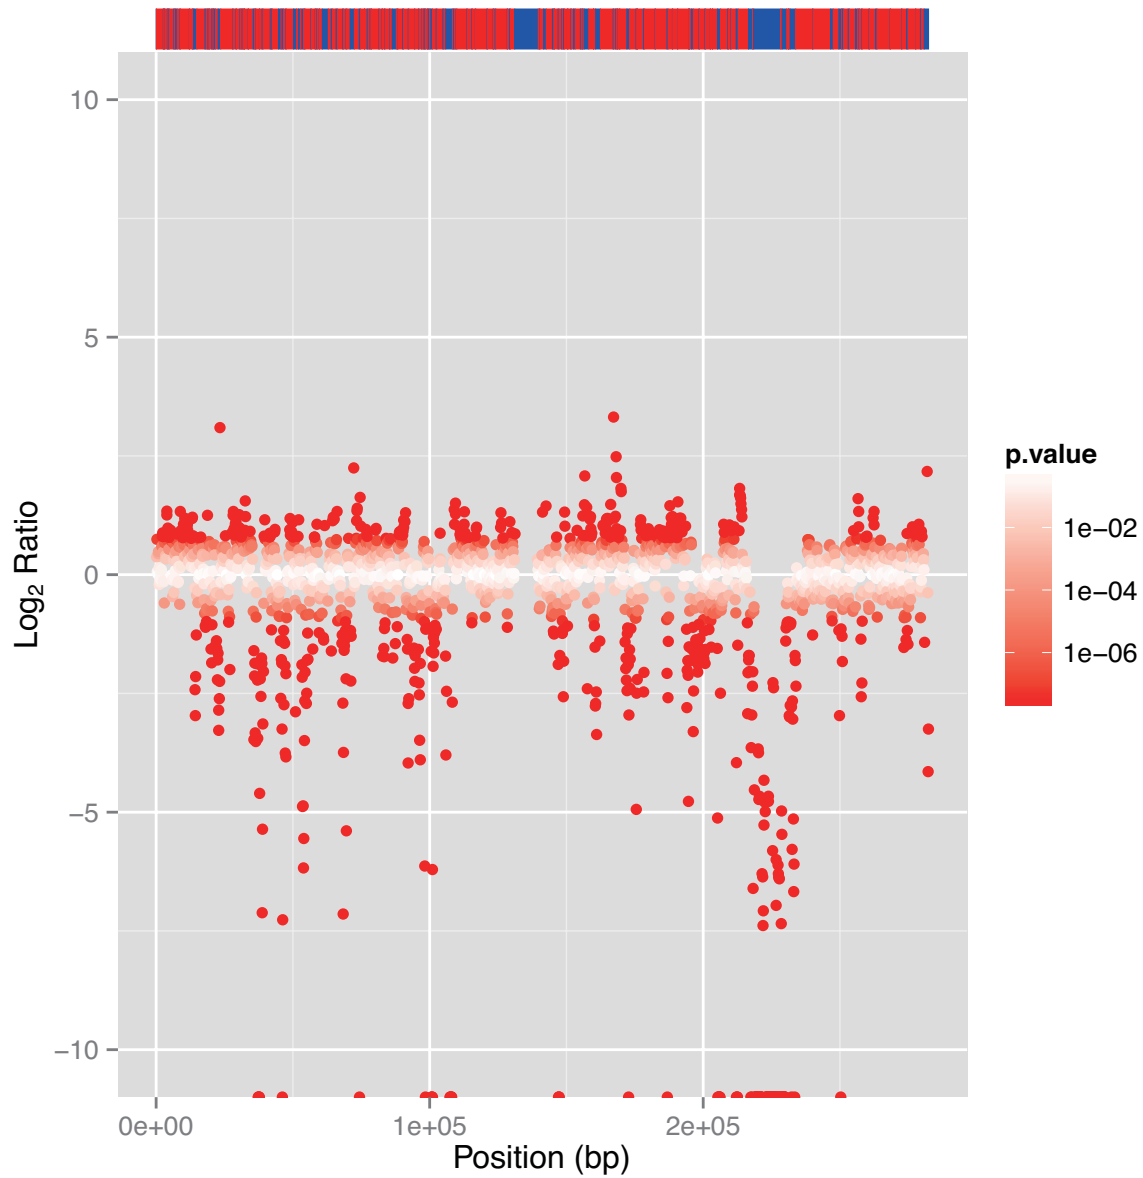

ltr\_sc000106.1

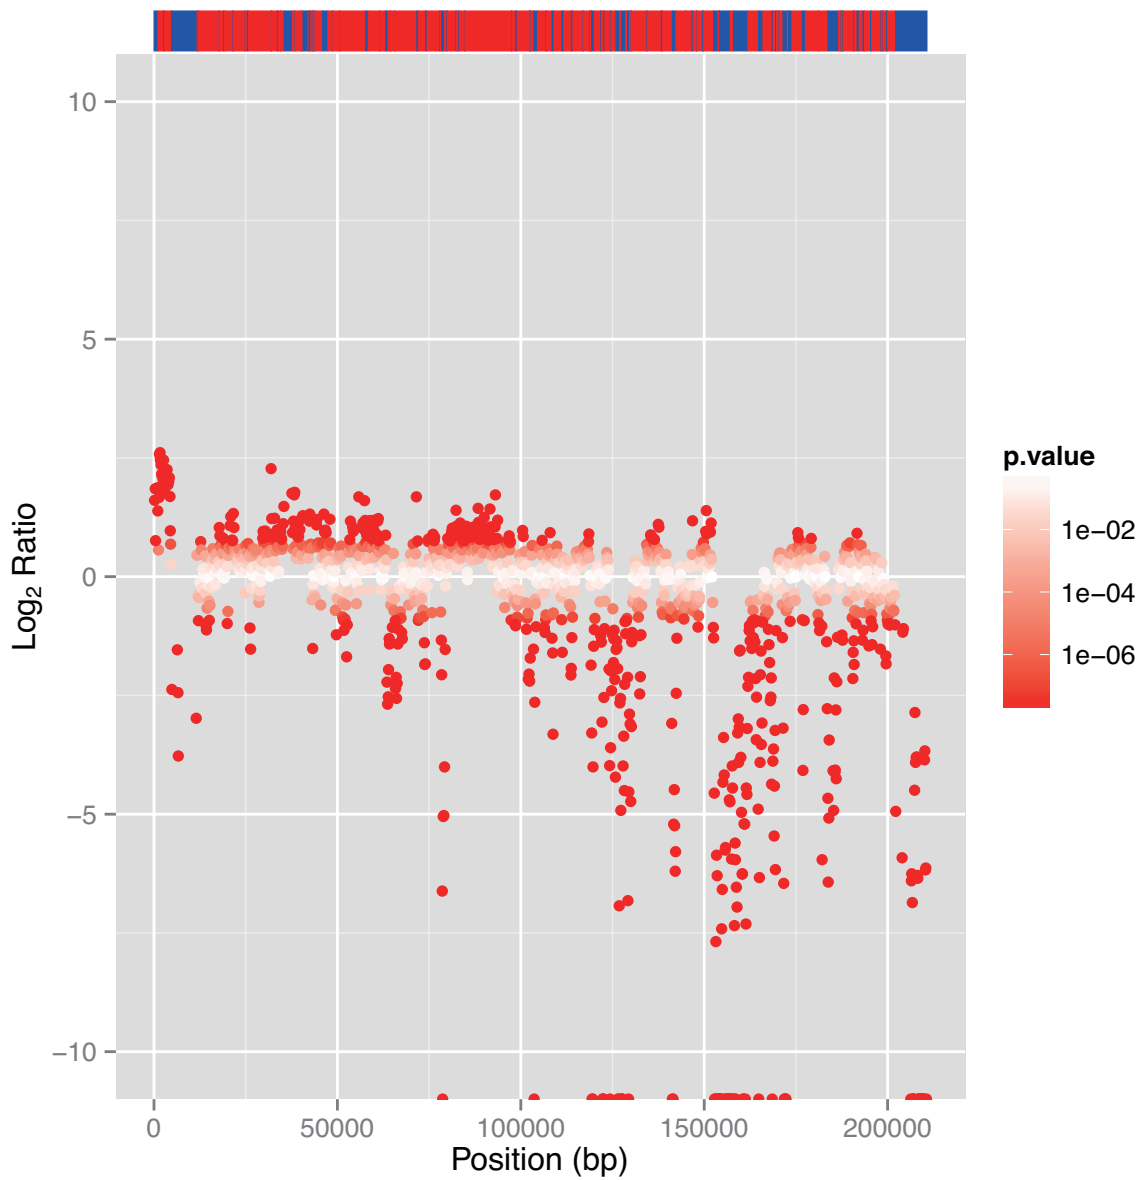

# ltr\_sc000119.1

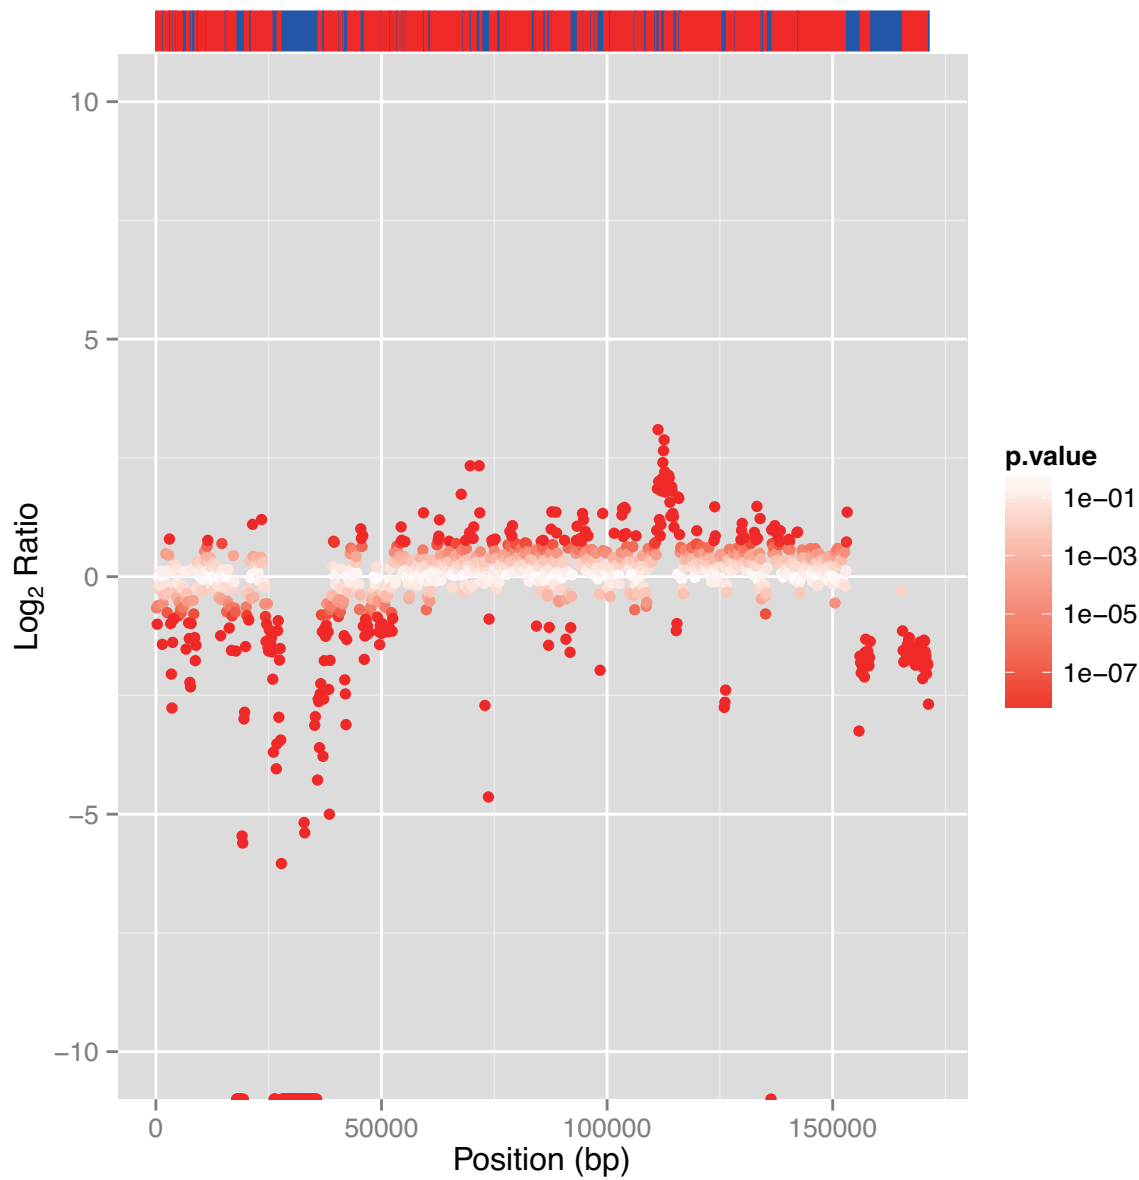



# ltr\_sc000143.1

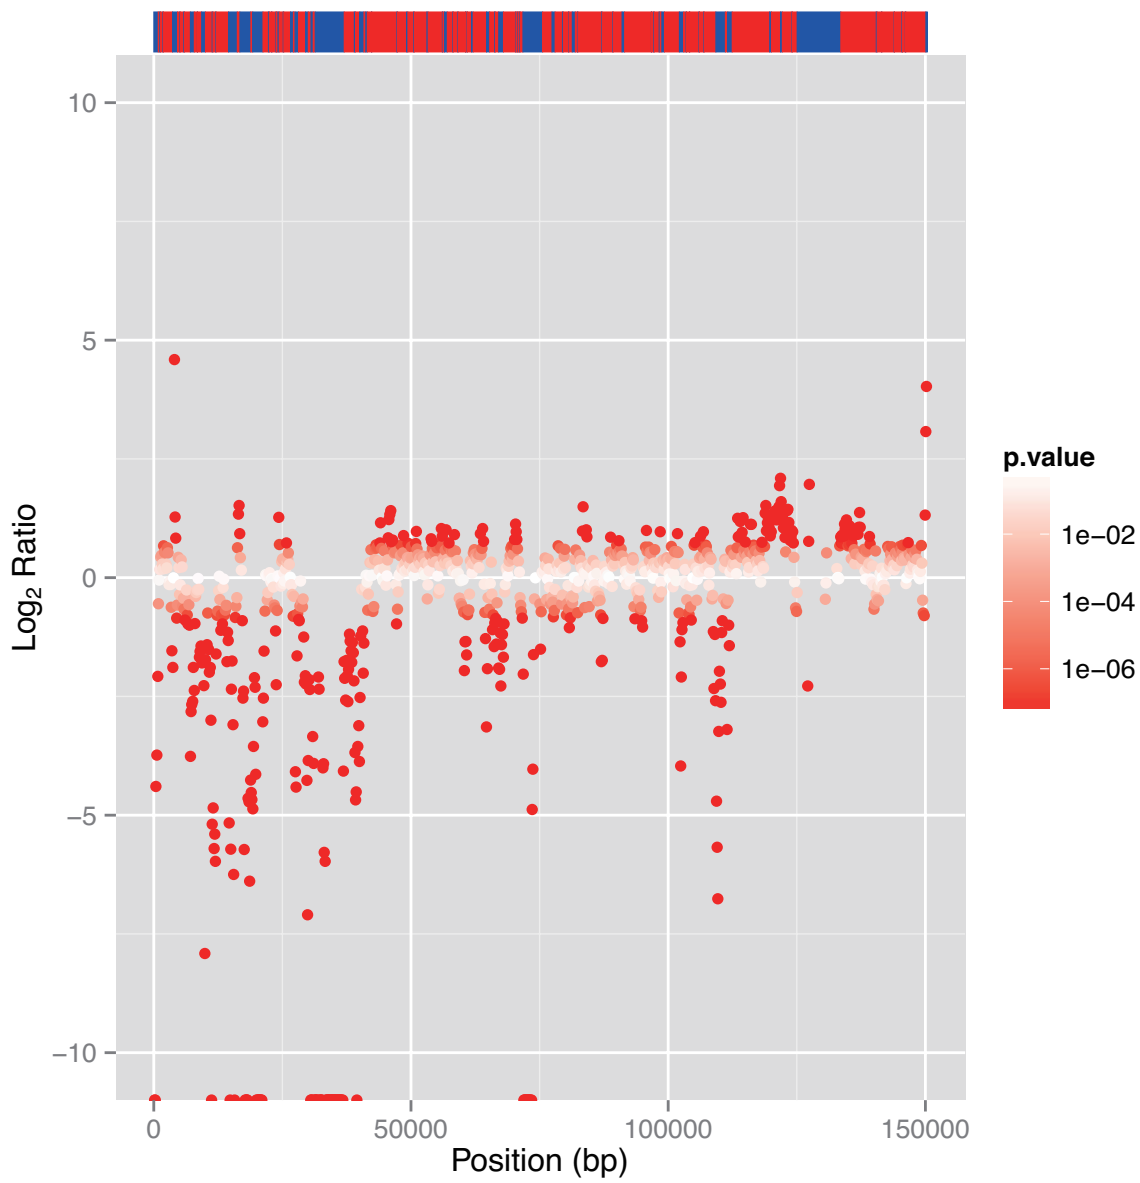

# ltr\_sc000189.1

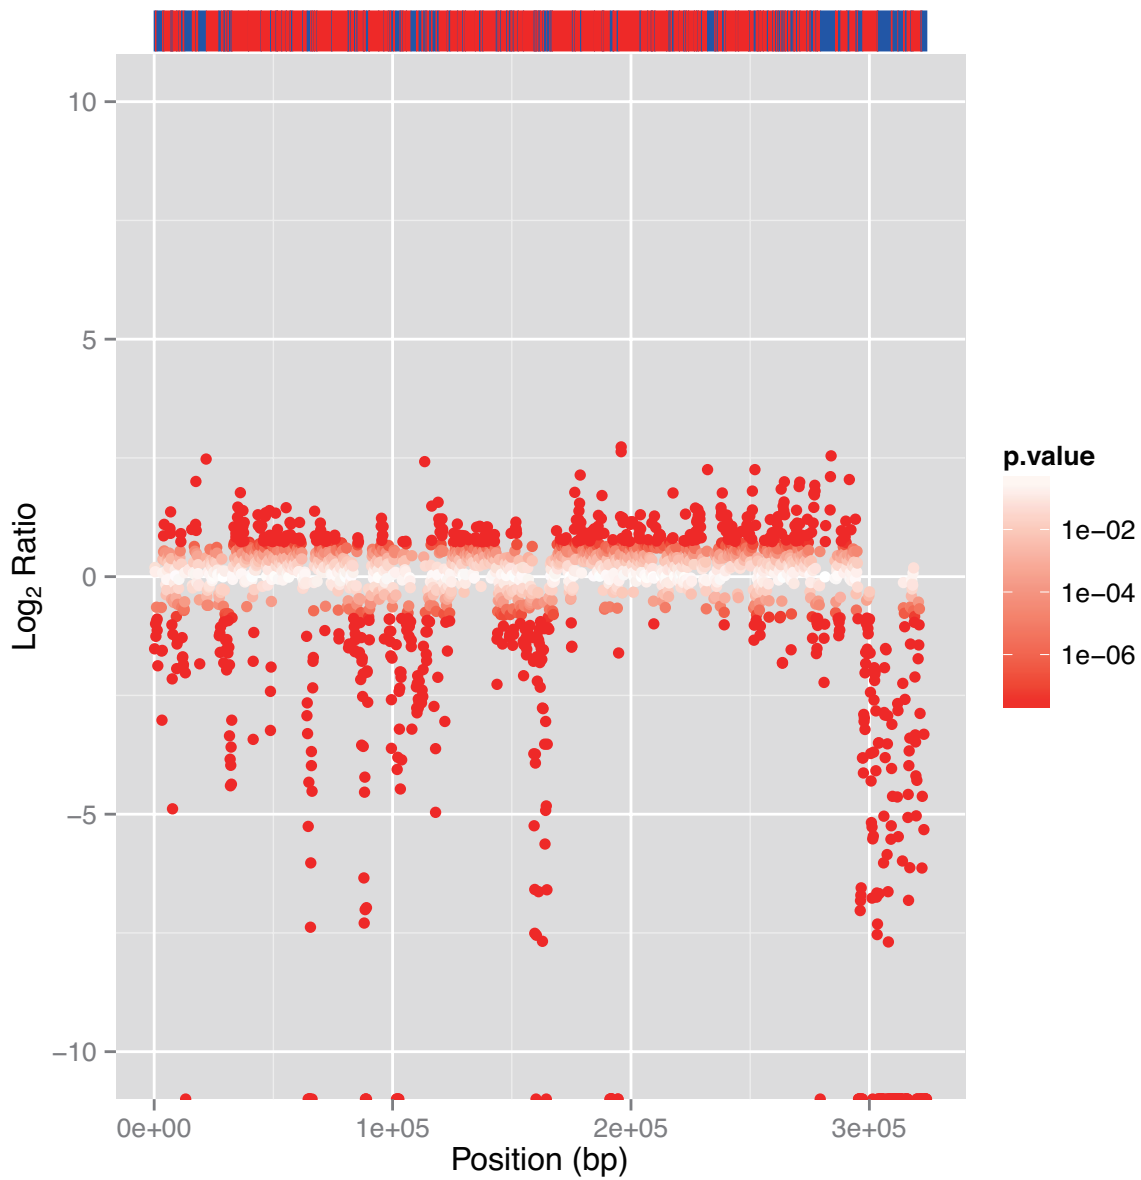

# ltr\_sc000231.1

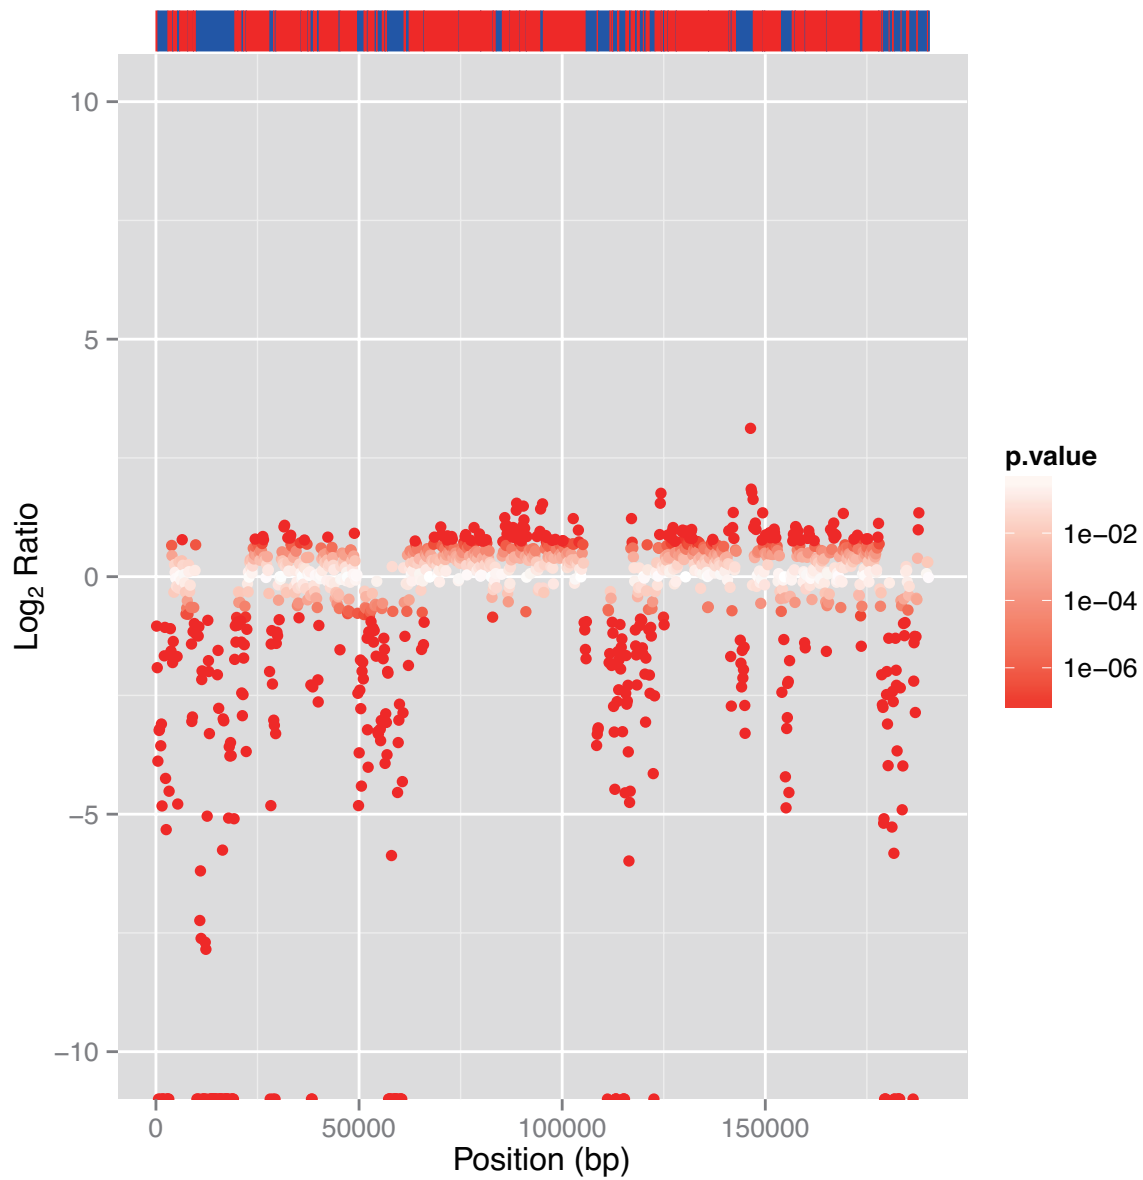

# ltr\_sc000239.1

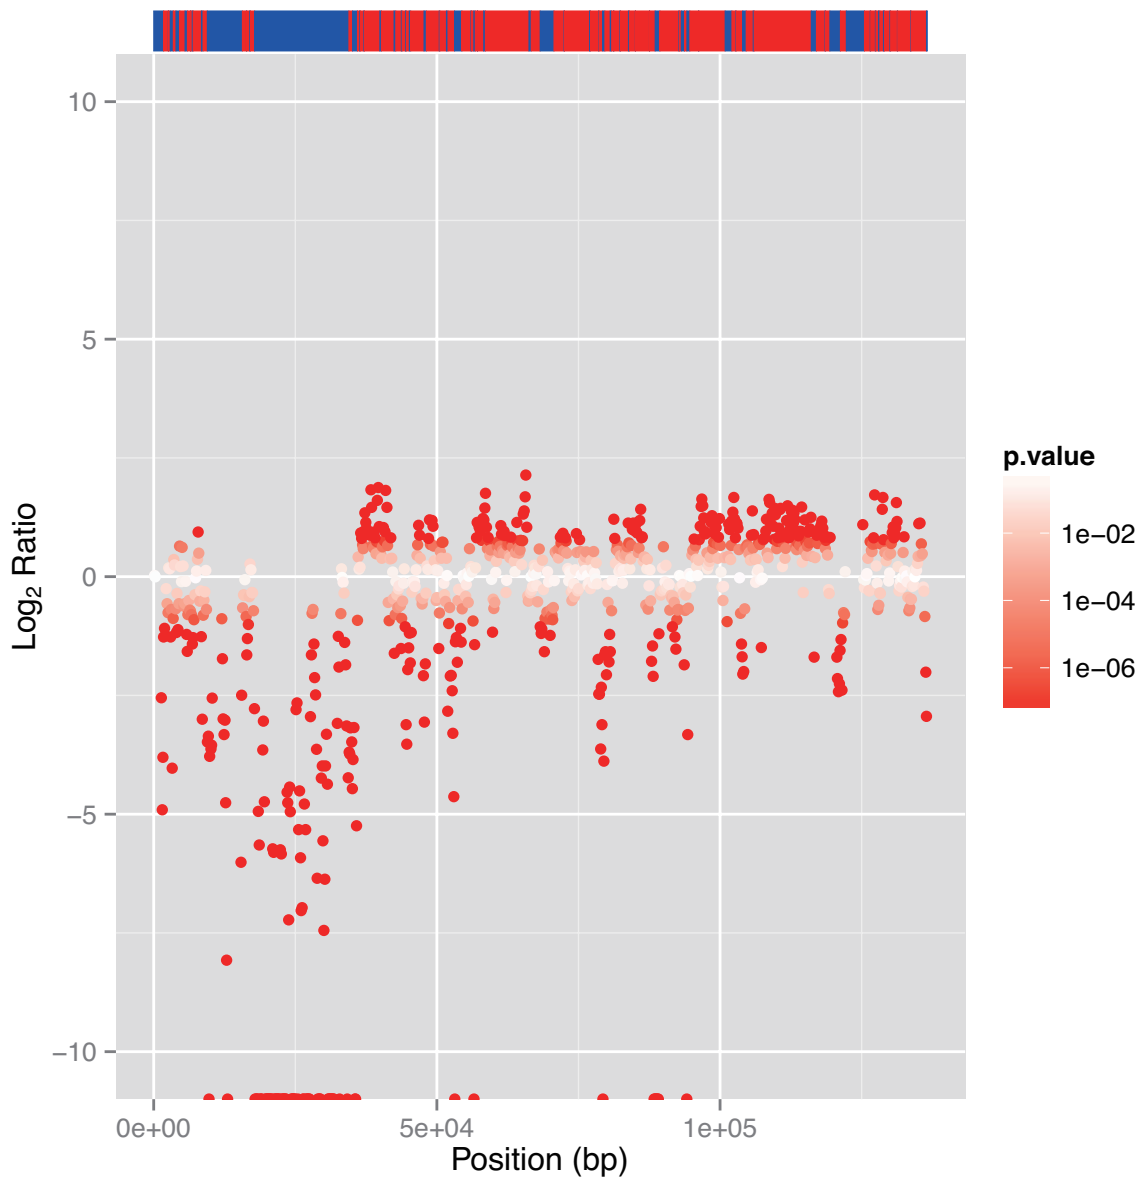

# ltr\_sc000306.1

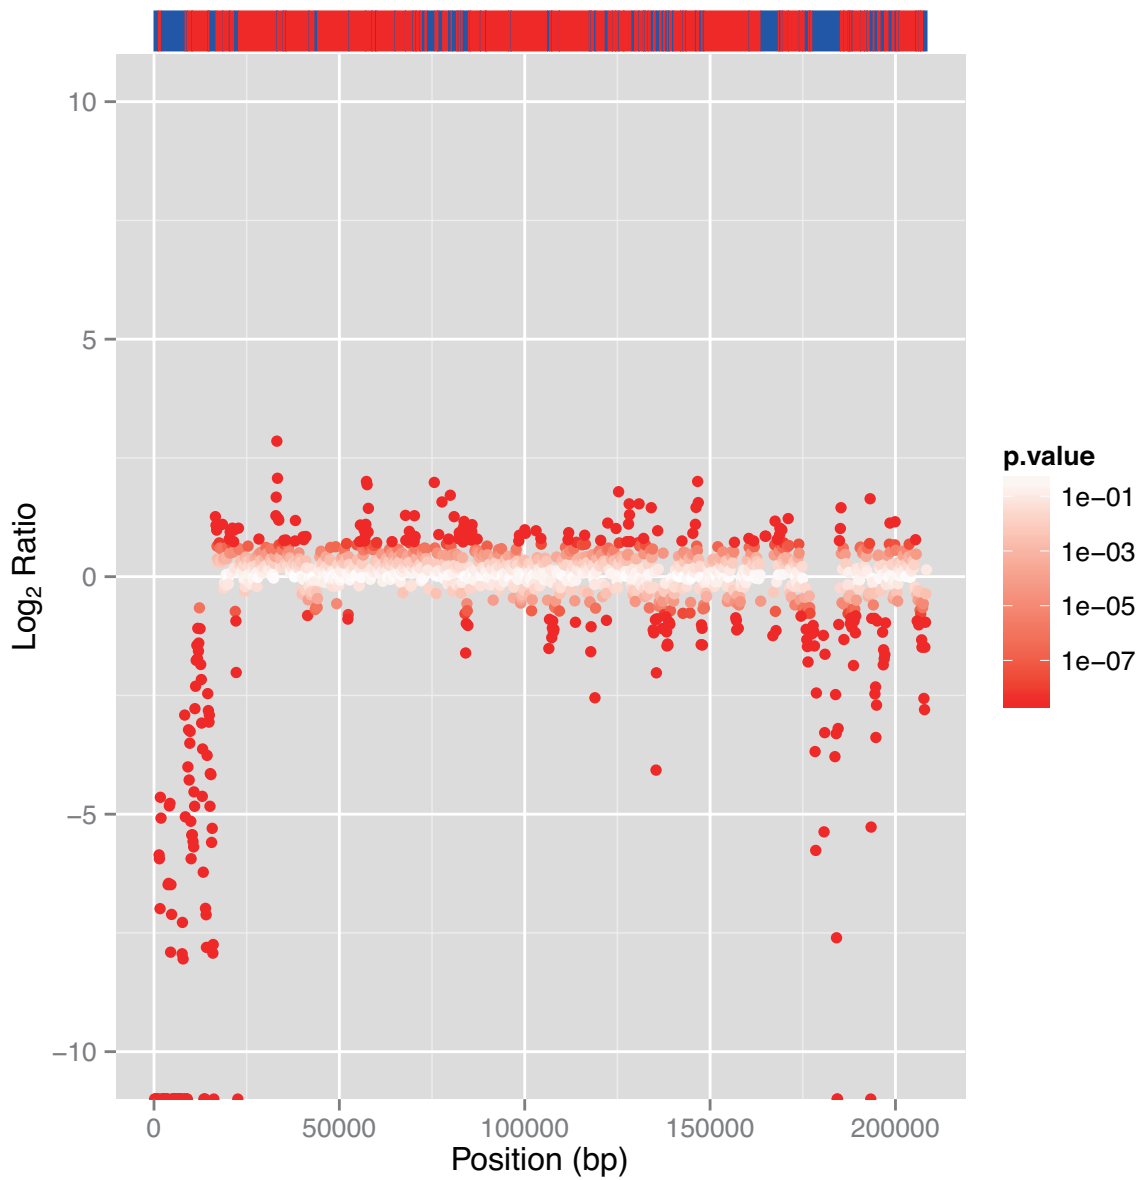

ltr\_sc000321.1

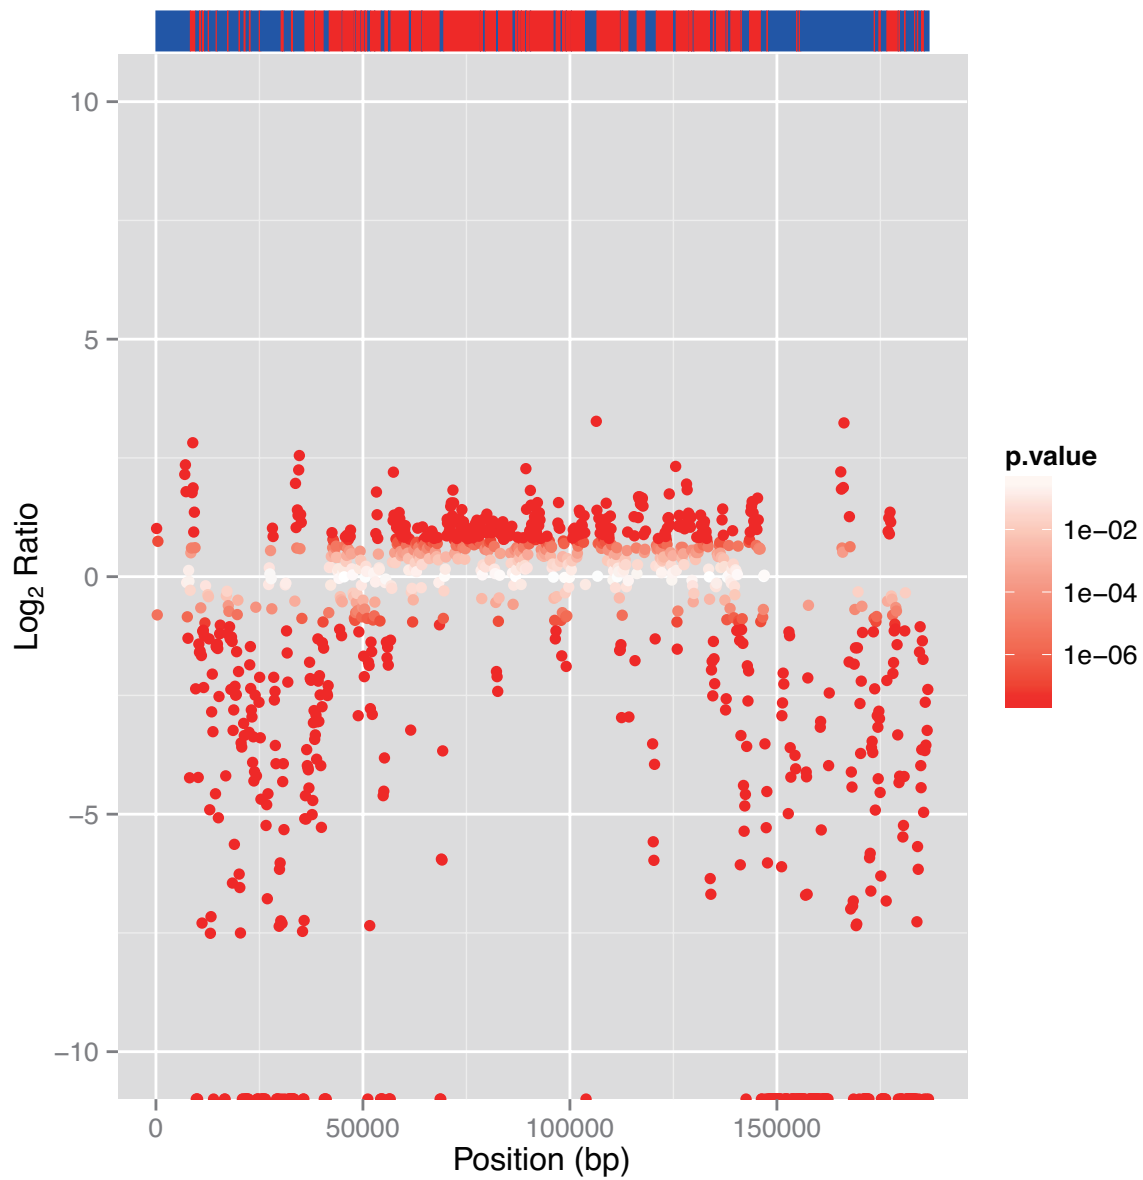

# ltr\_sc000417.1

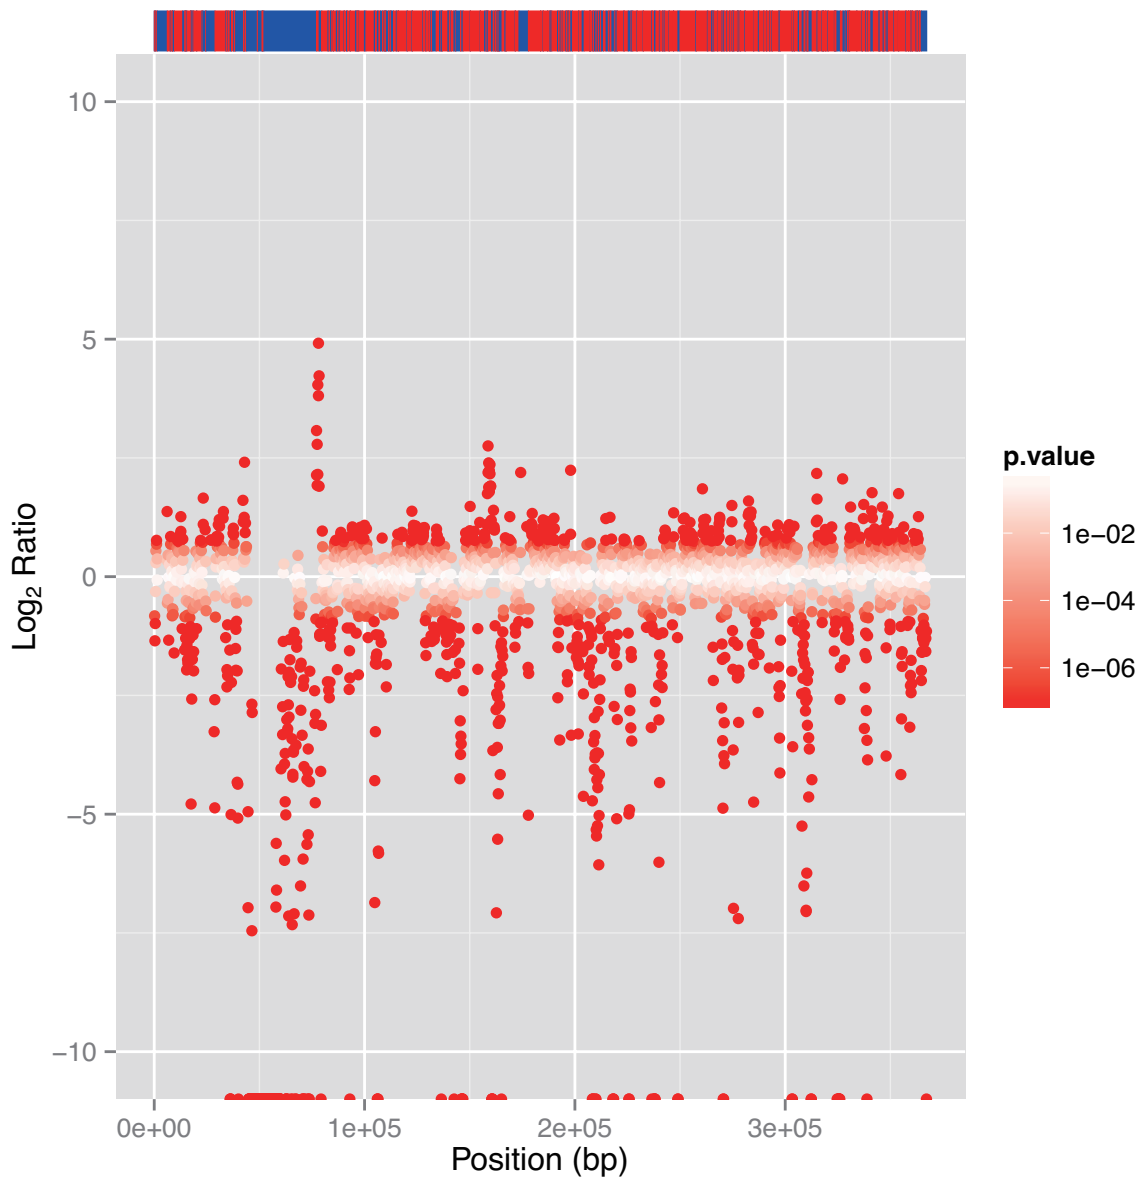

ltr\_sc000431.1

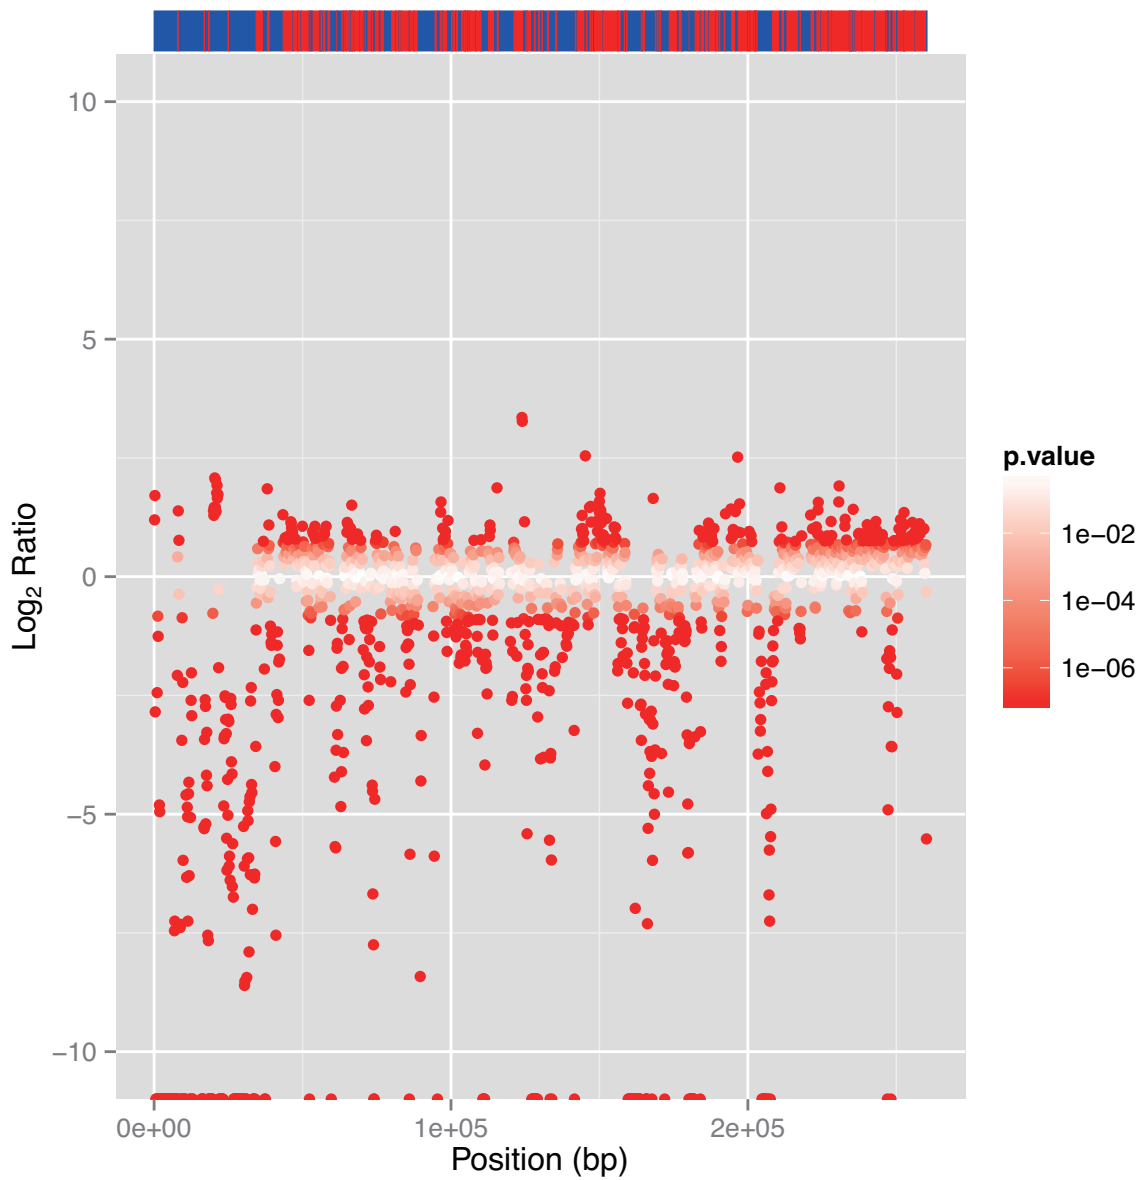



# ltr\_sc000437.1

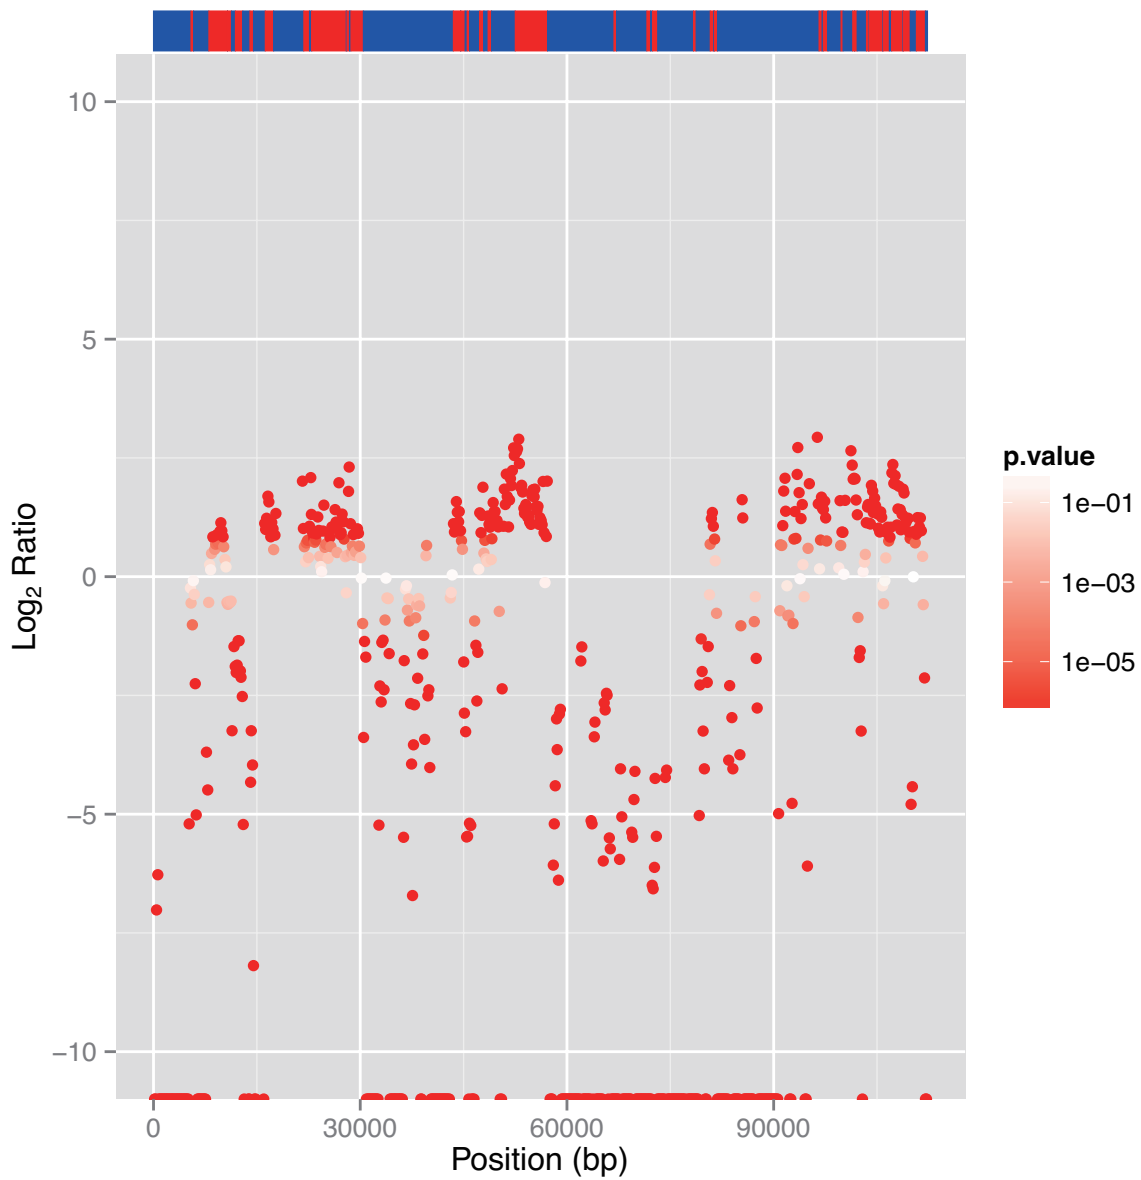

ltr\_sc000442.1

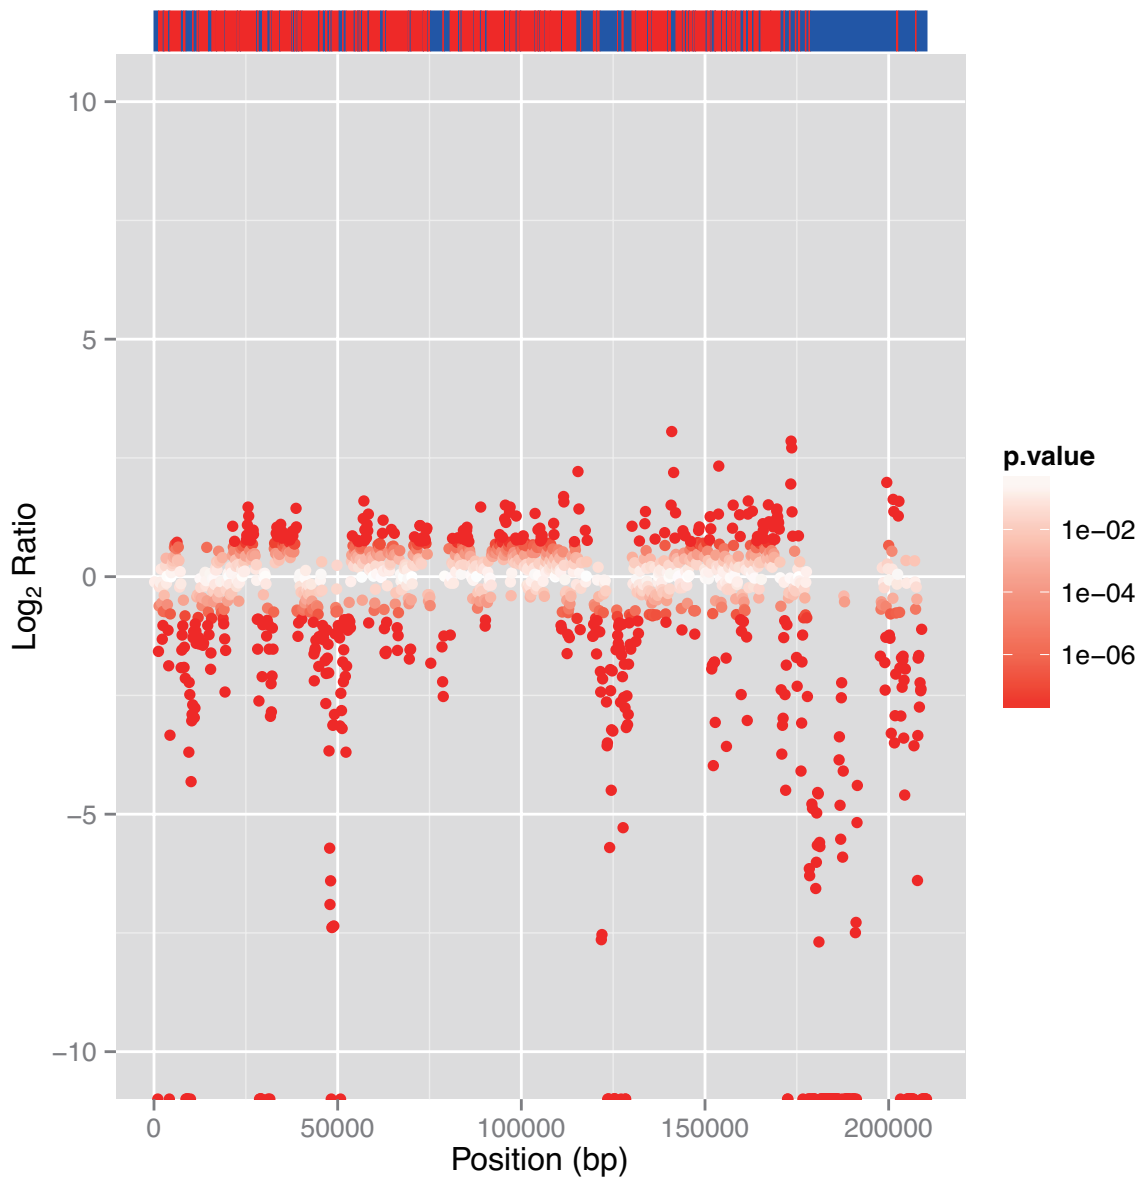

ltr\_sc000464.1

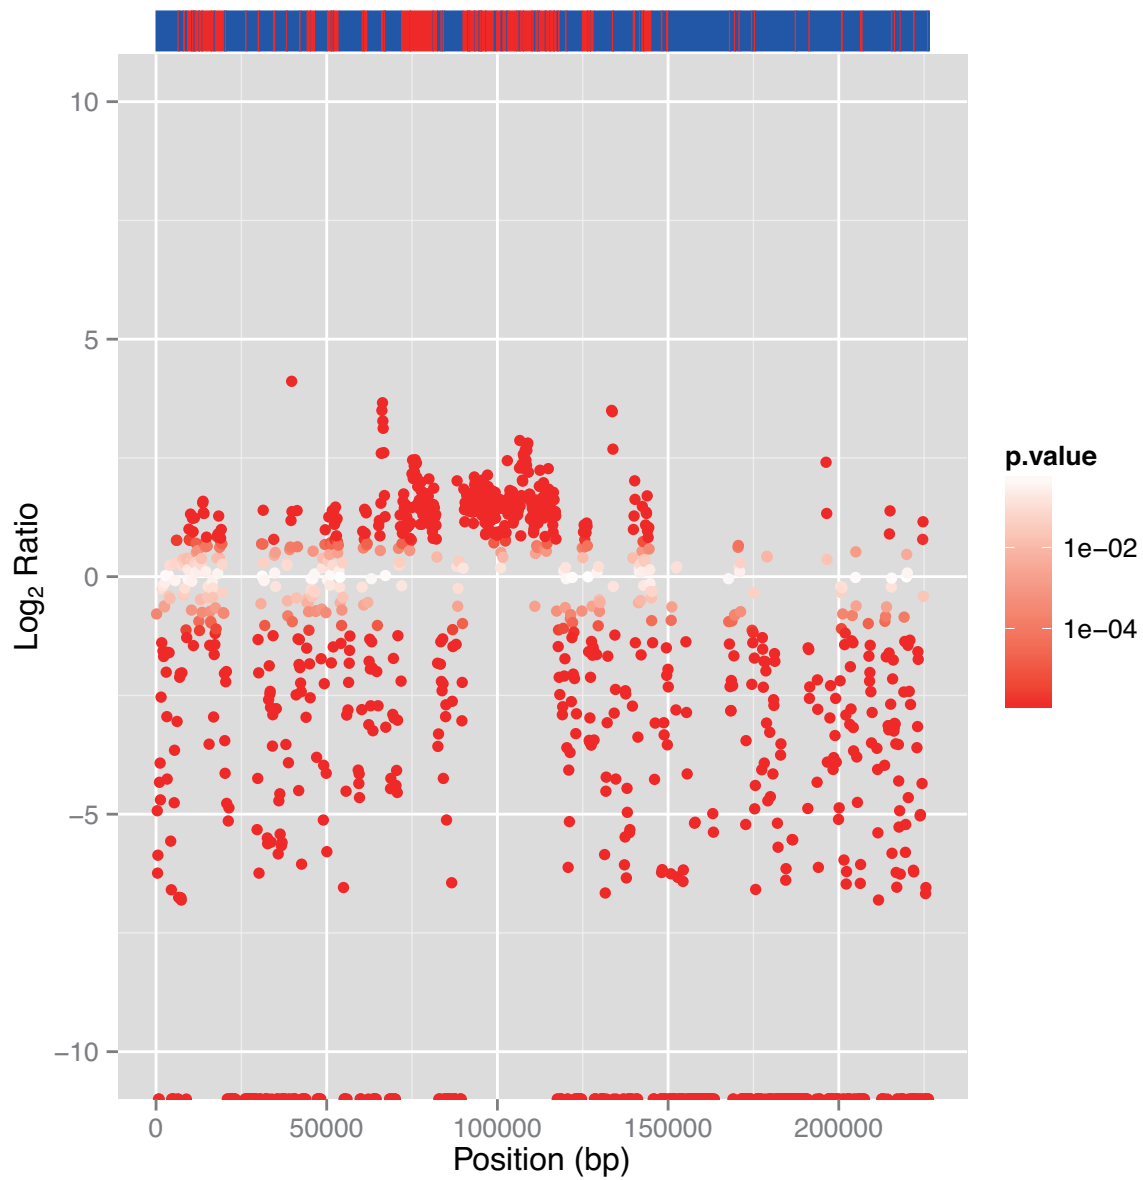

ltr\_sc000466.1

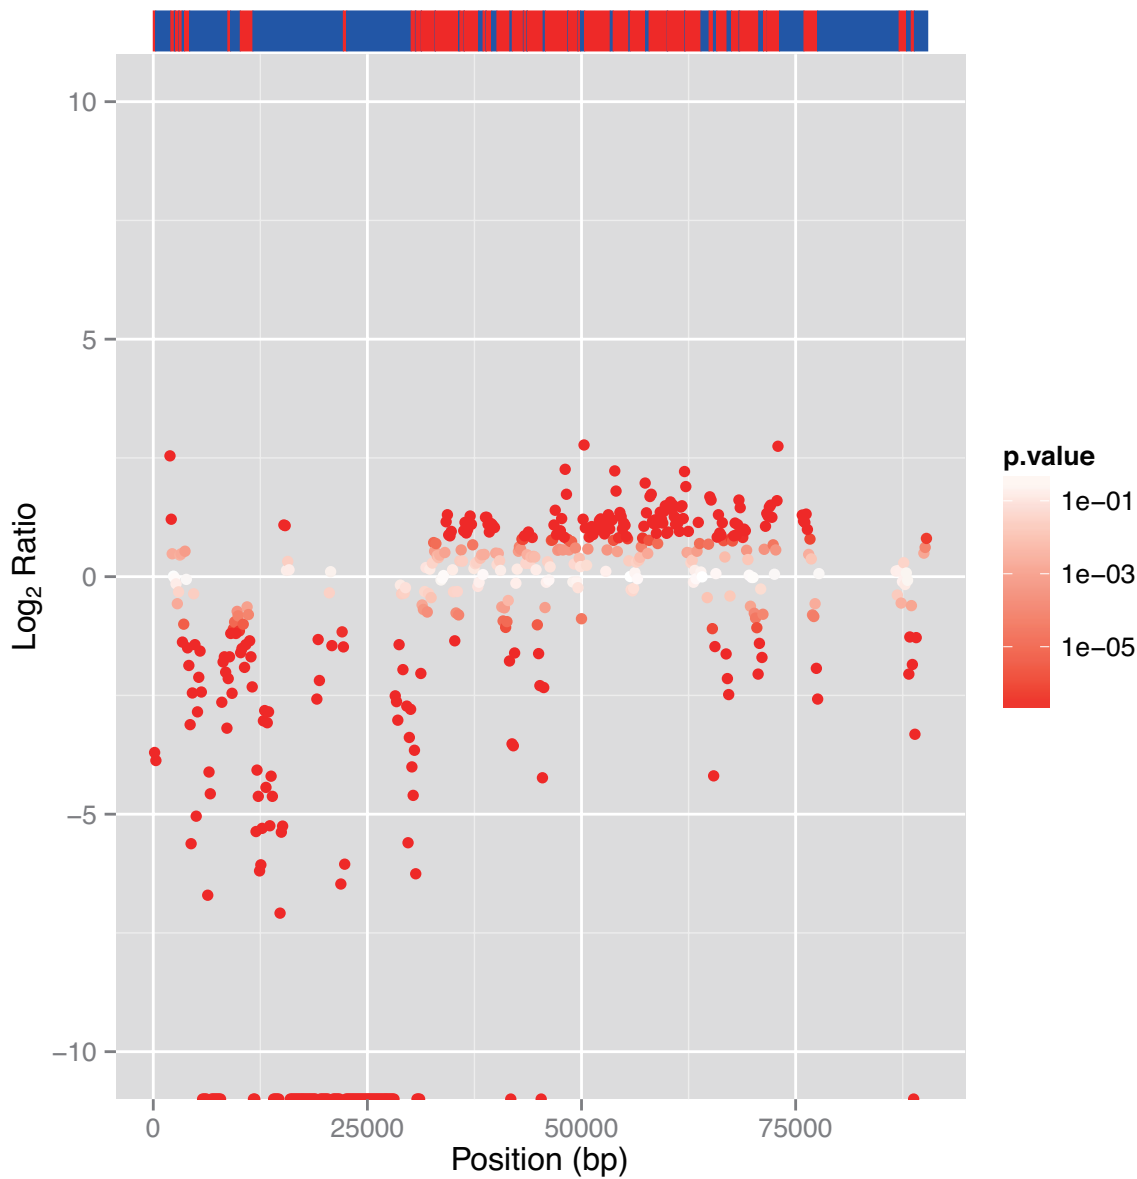

ltr\_sc000492.1

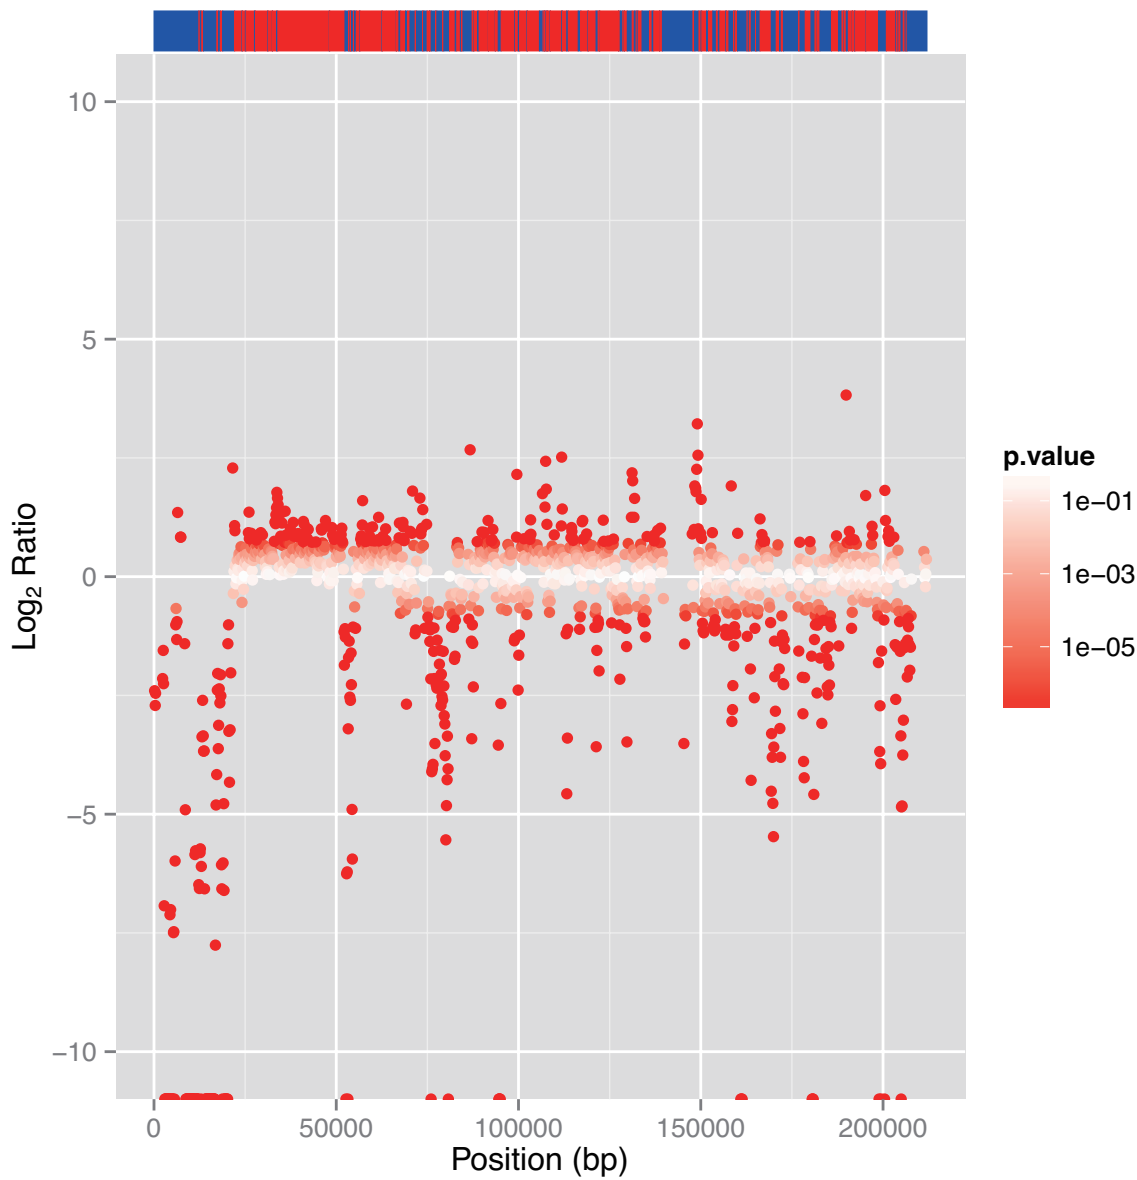

ltr\_sc000544.1

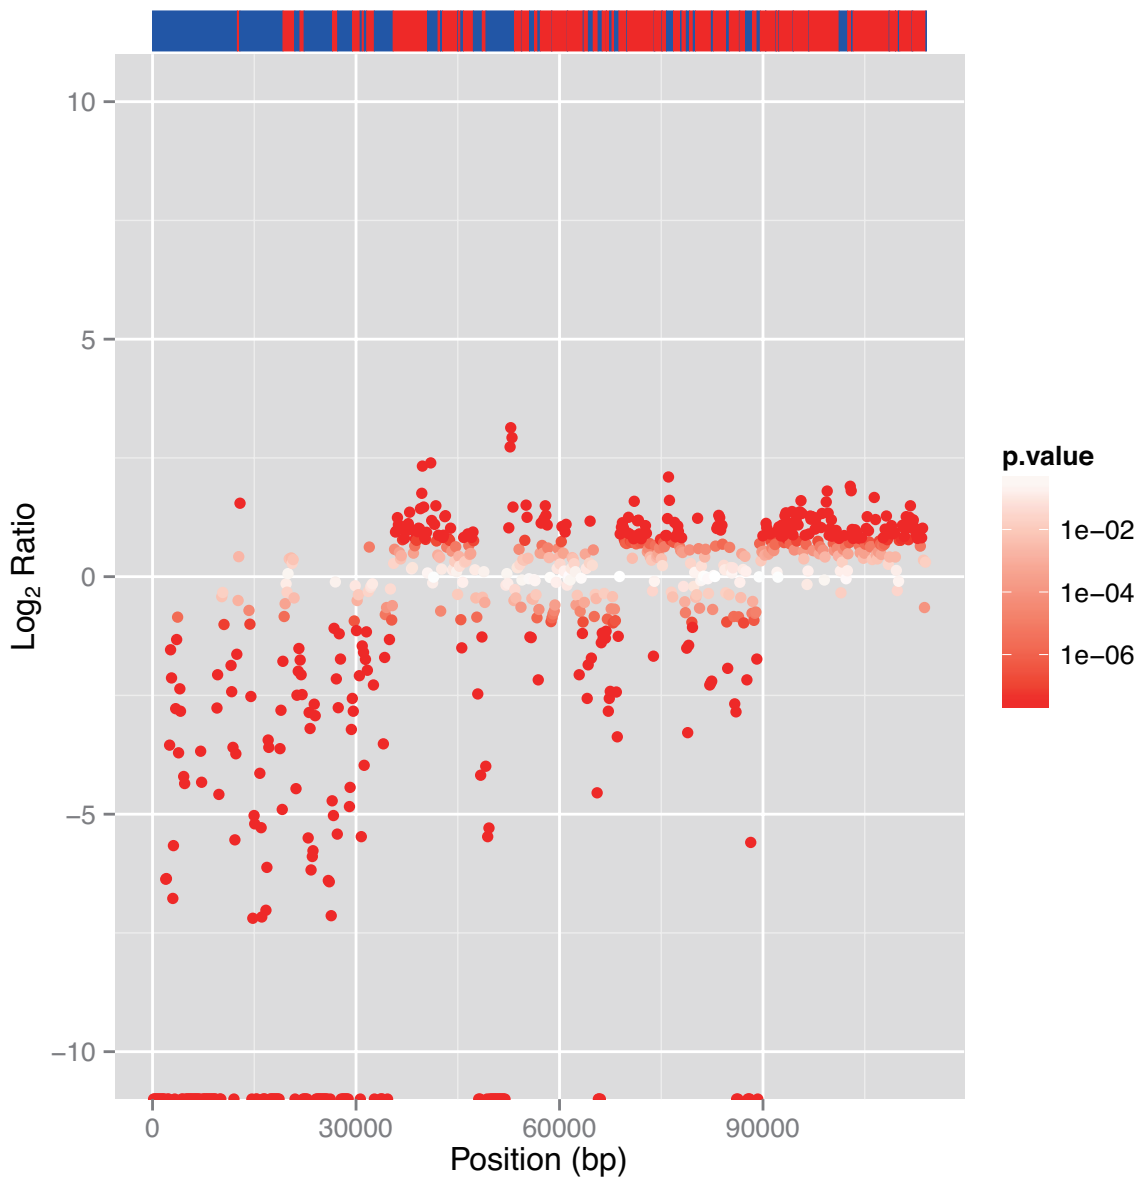

ltr\_sc000592.1

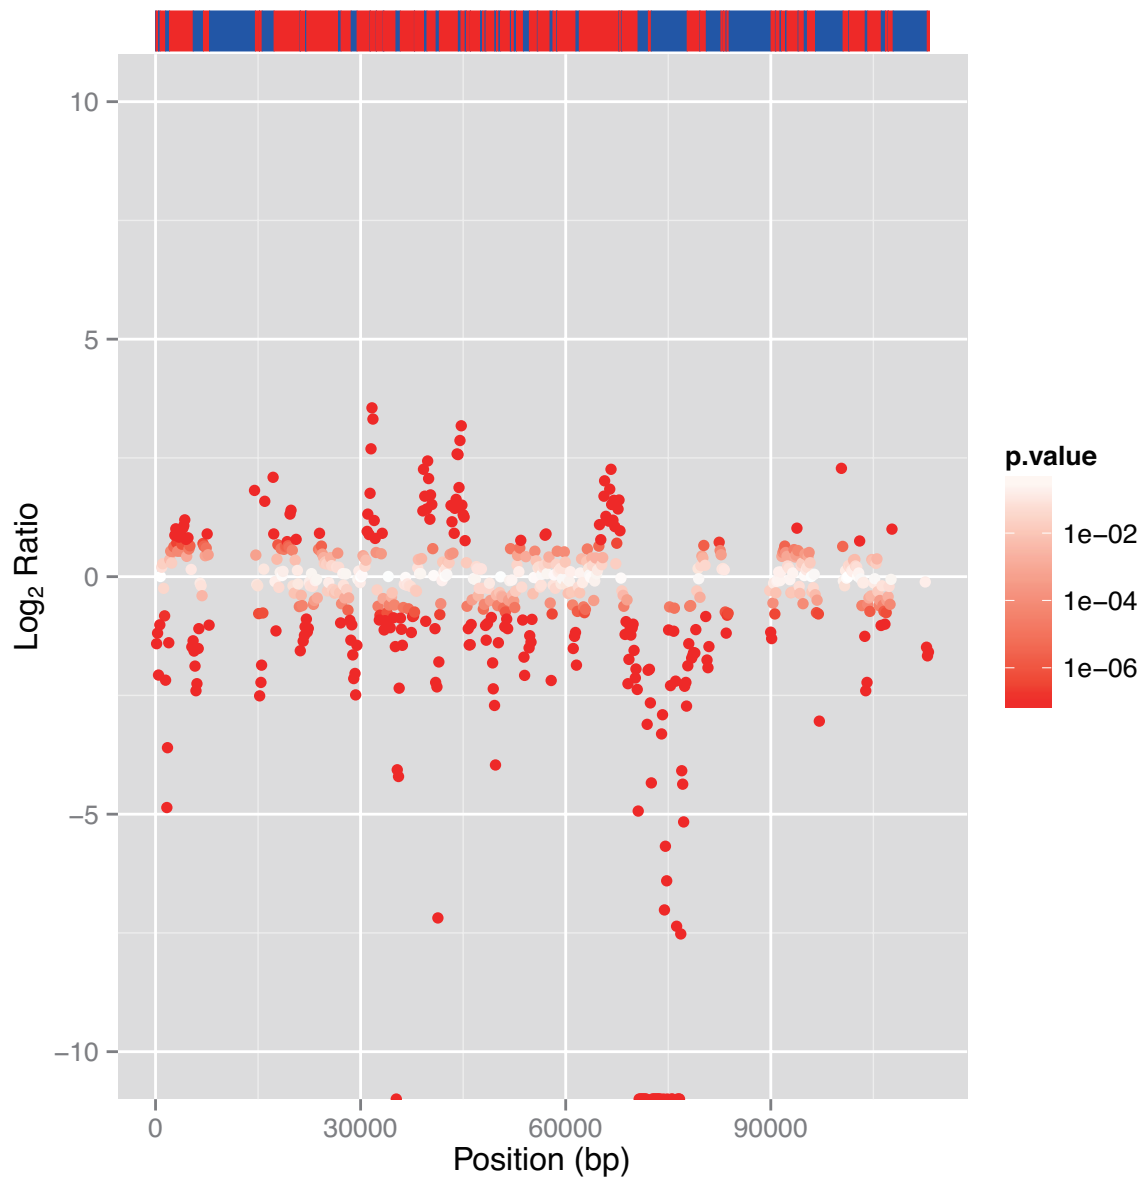

ltr\_sc000597.1

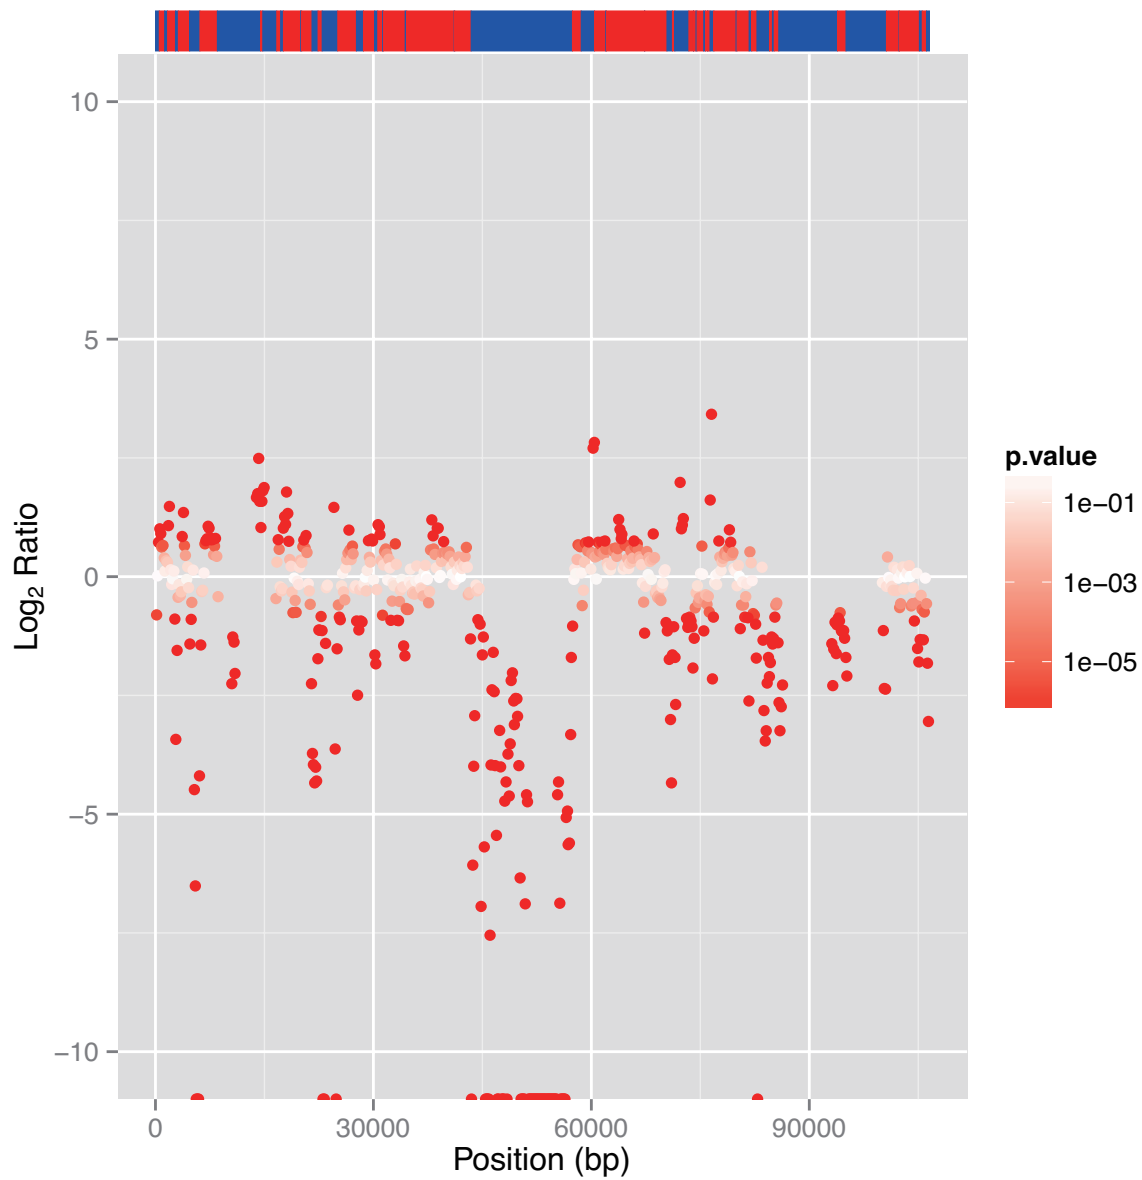



ltr\_sc000599.1

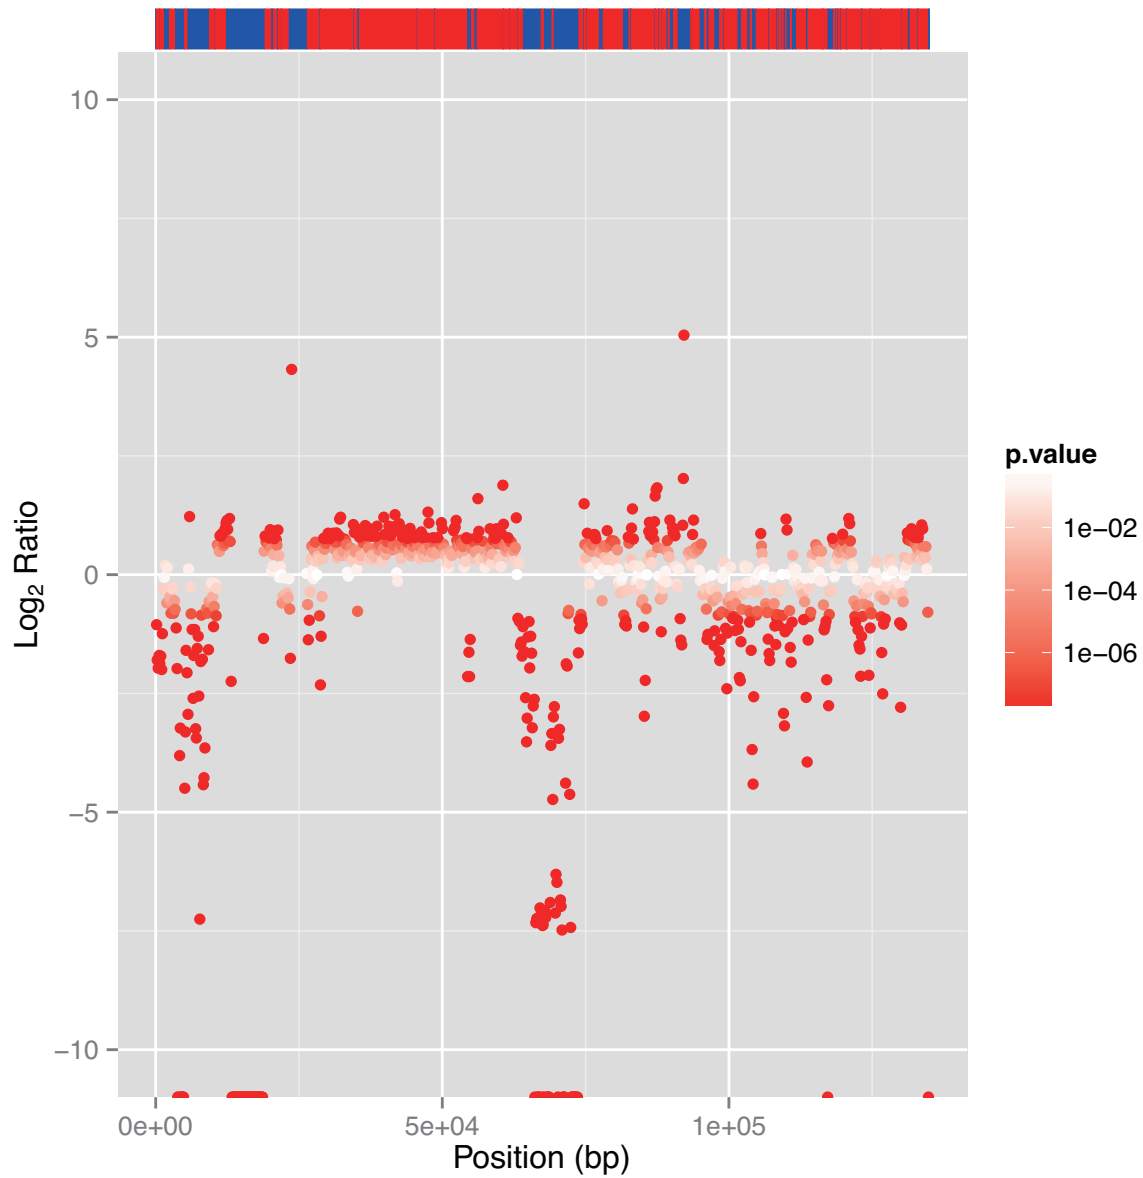

# ltr\_sc000607.1

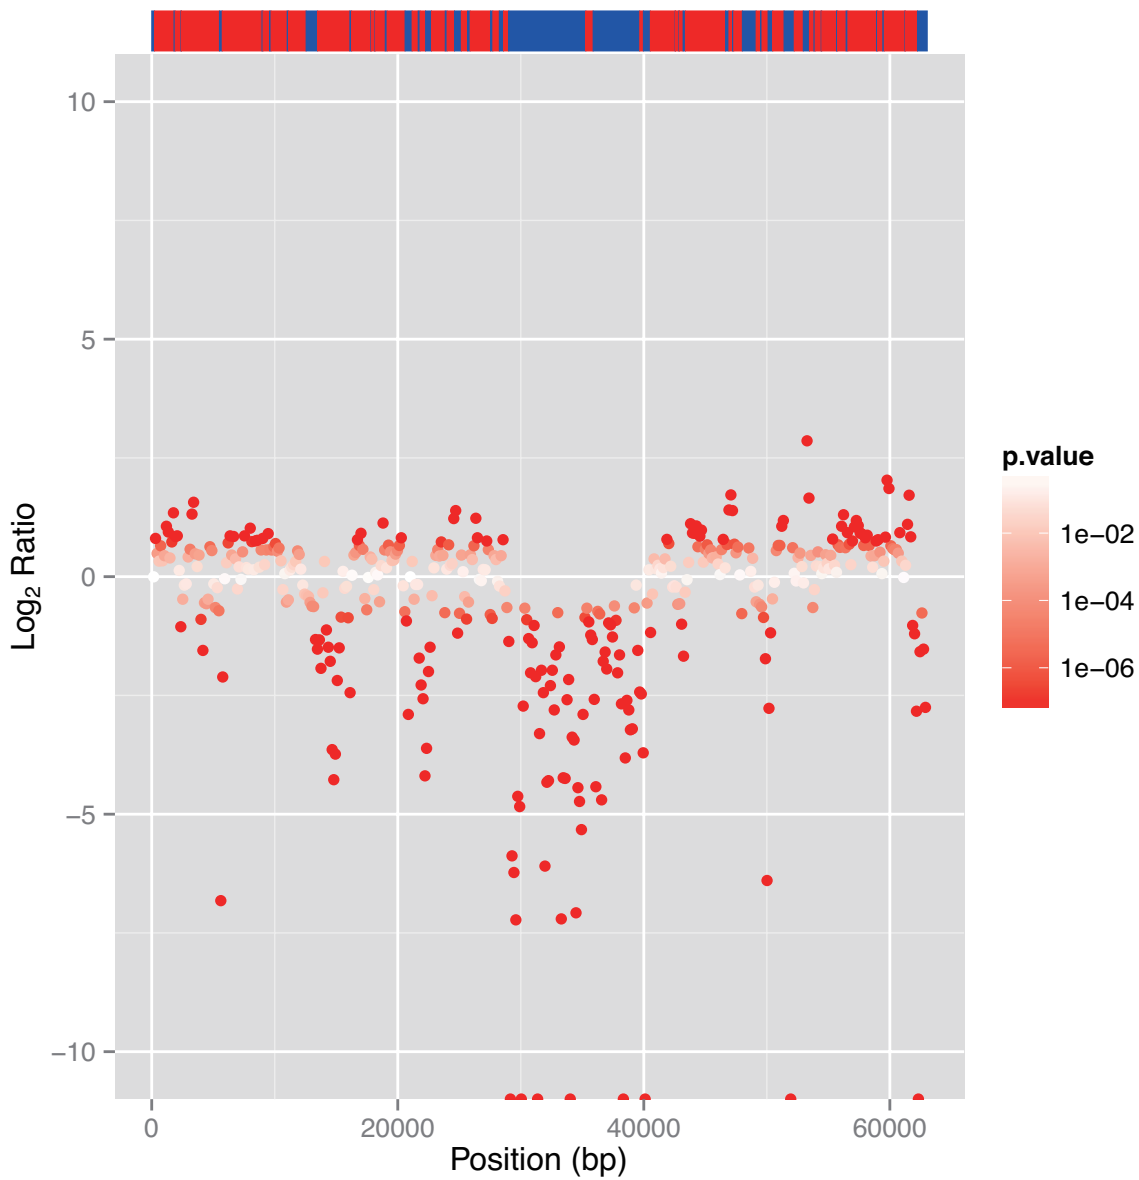

ltr\_sc000645.1

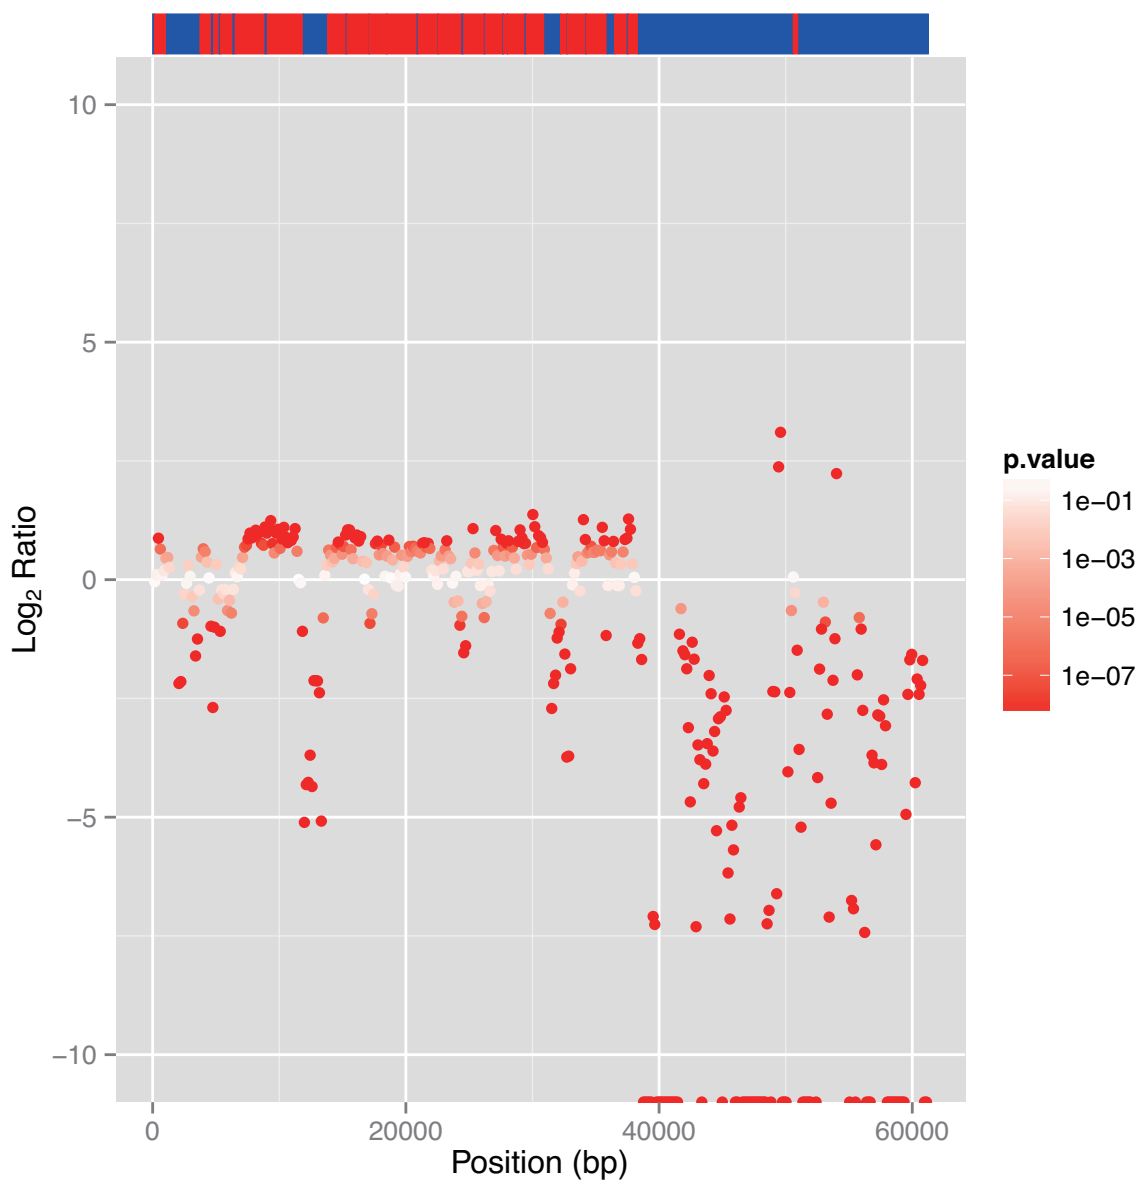

ltr\_sc000675.1

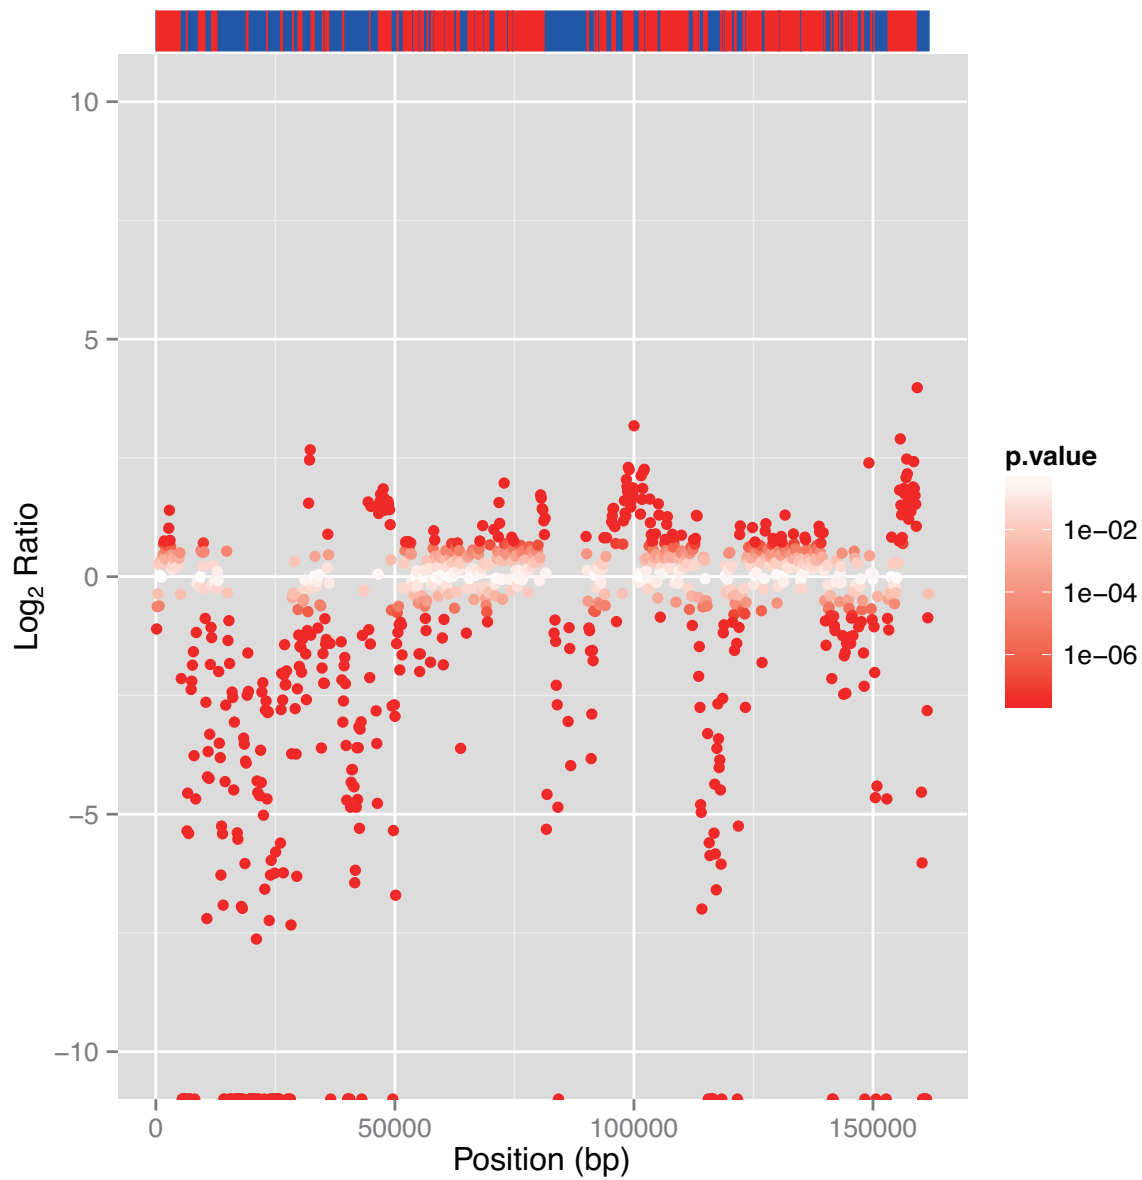

ltr\_sc000690.1

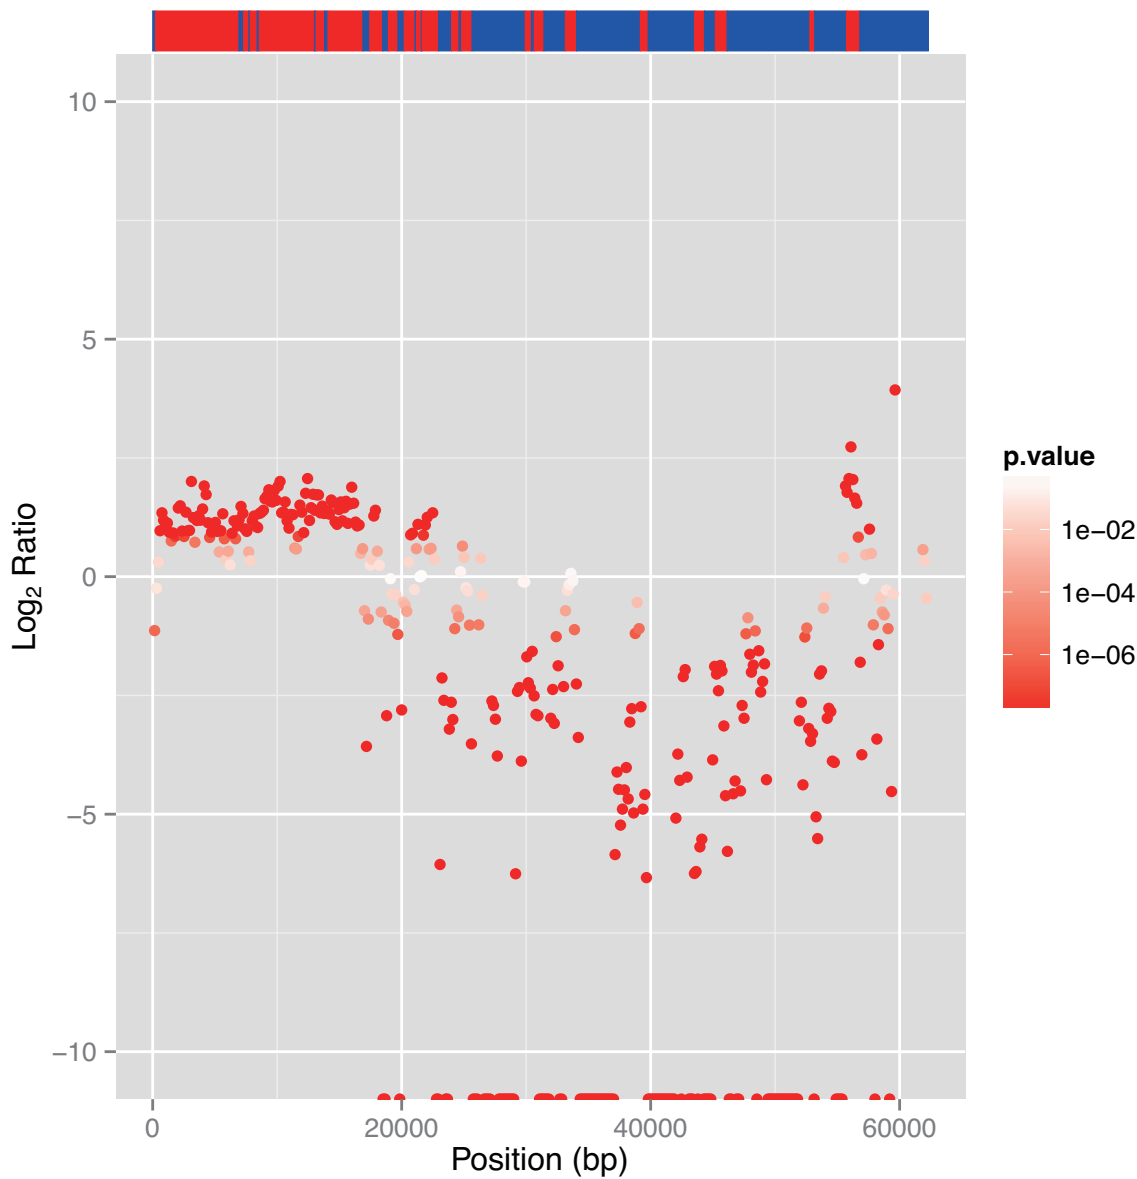

# ltr\_sc000714.1

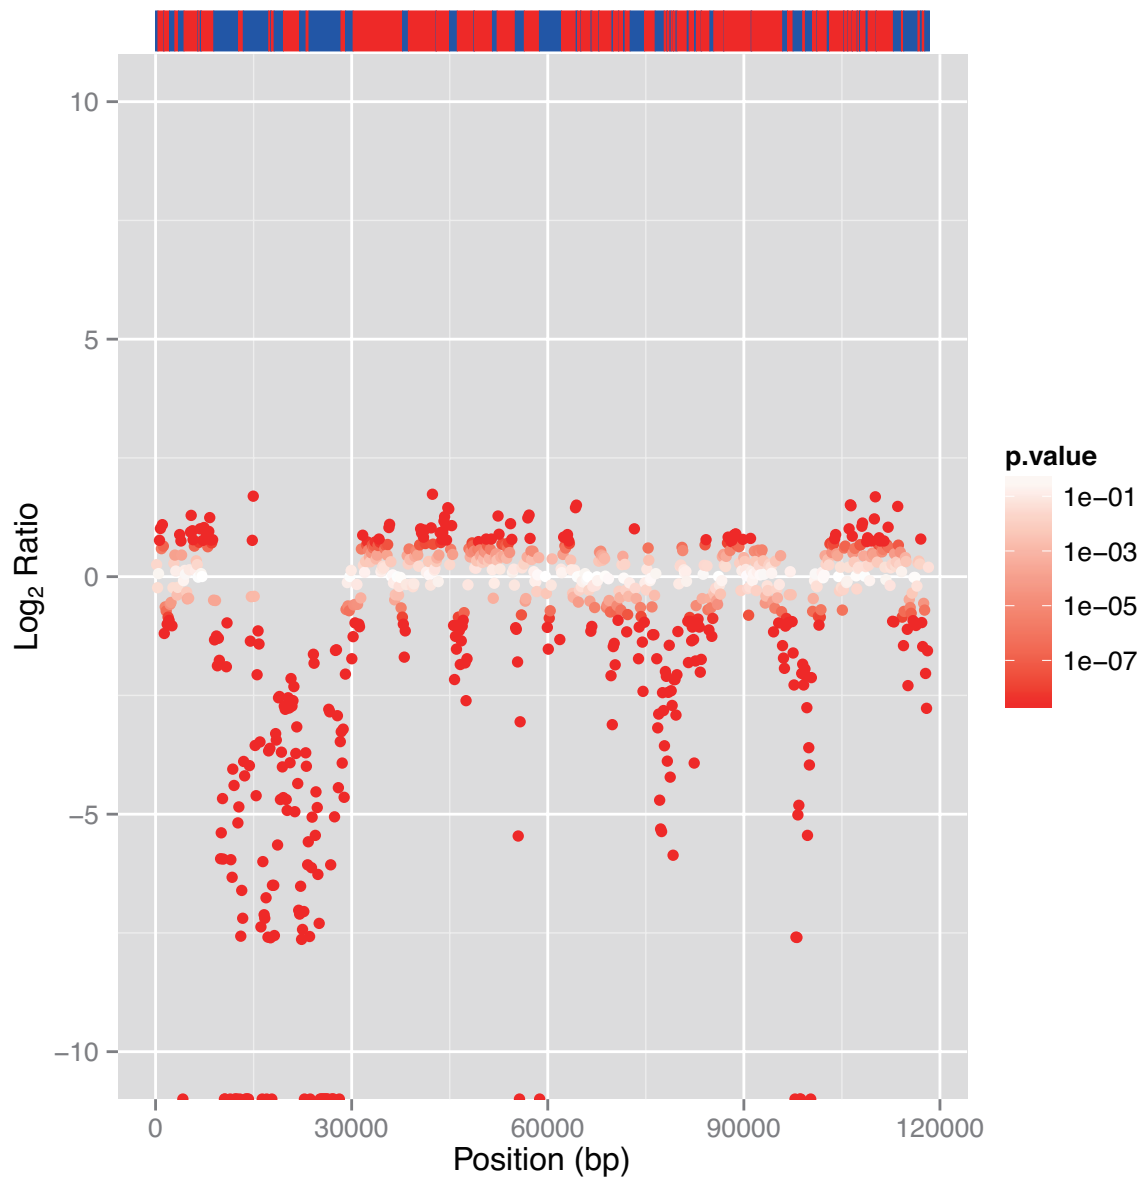

ltr\_sc000758.1

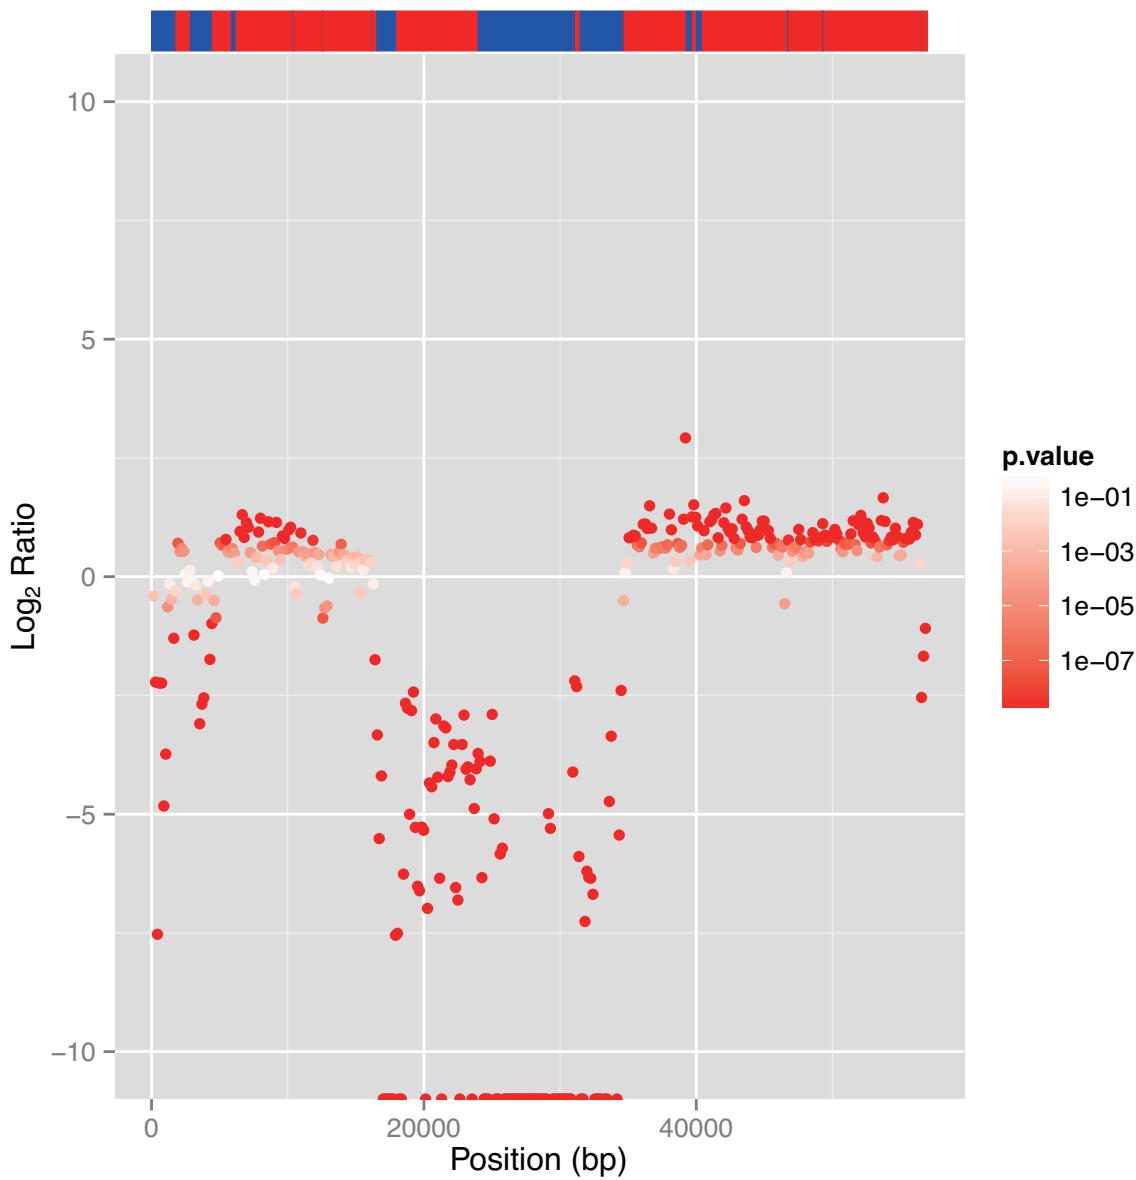

ltr\_sc000765.1

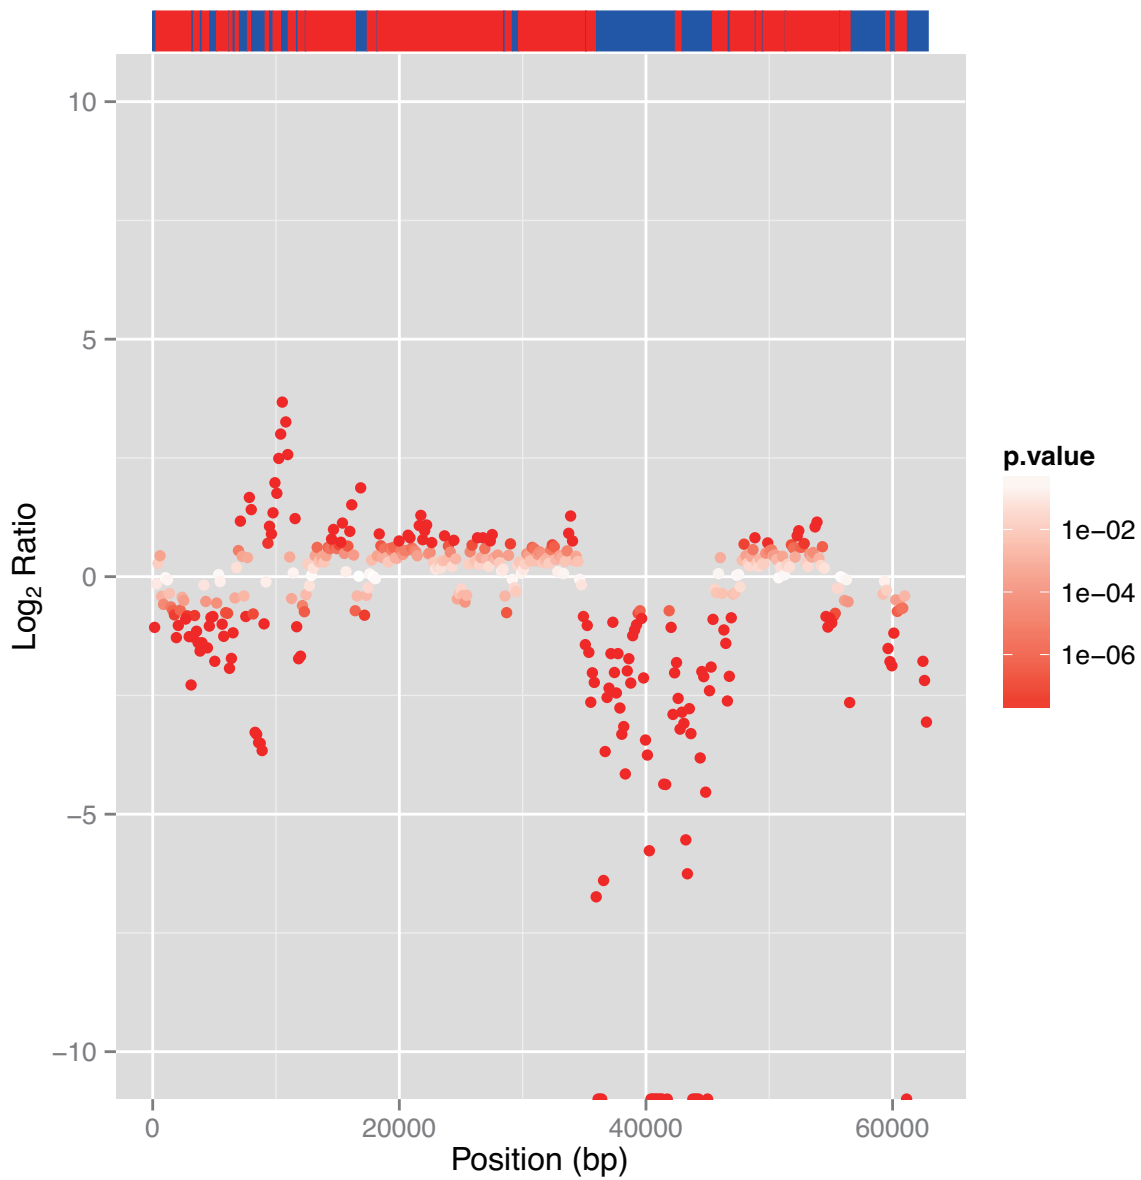



ltr\_sc000804.1

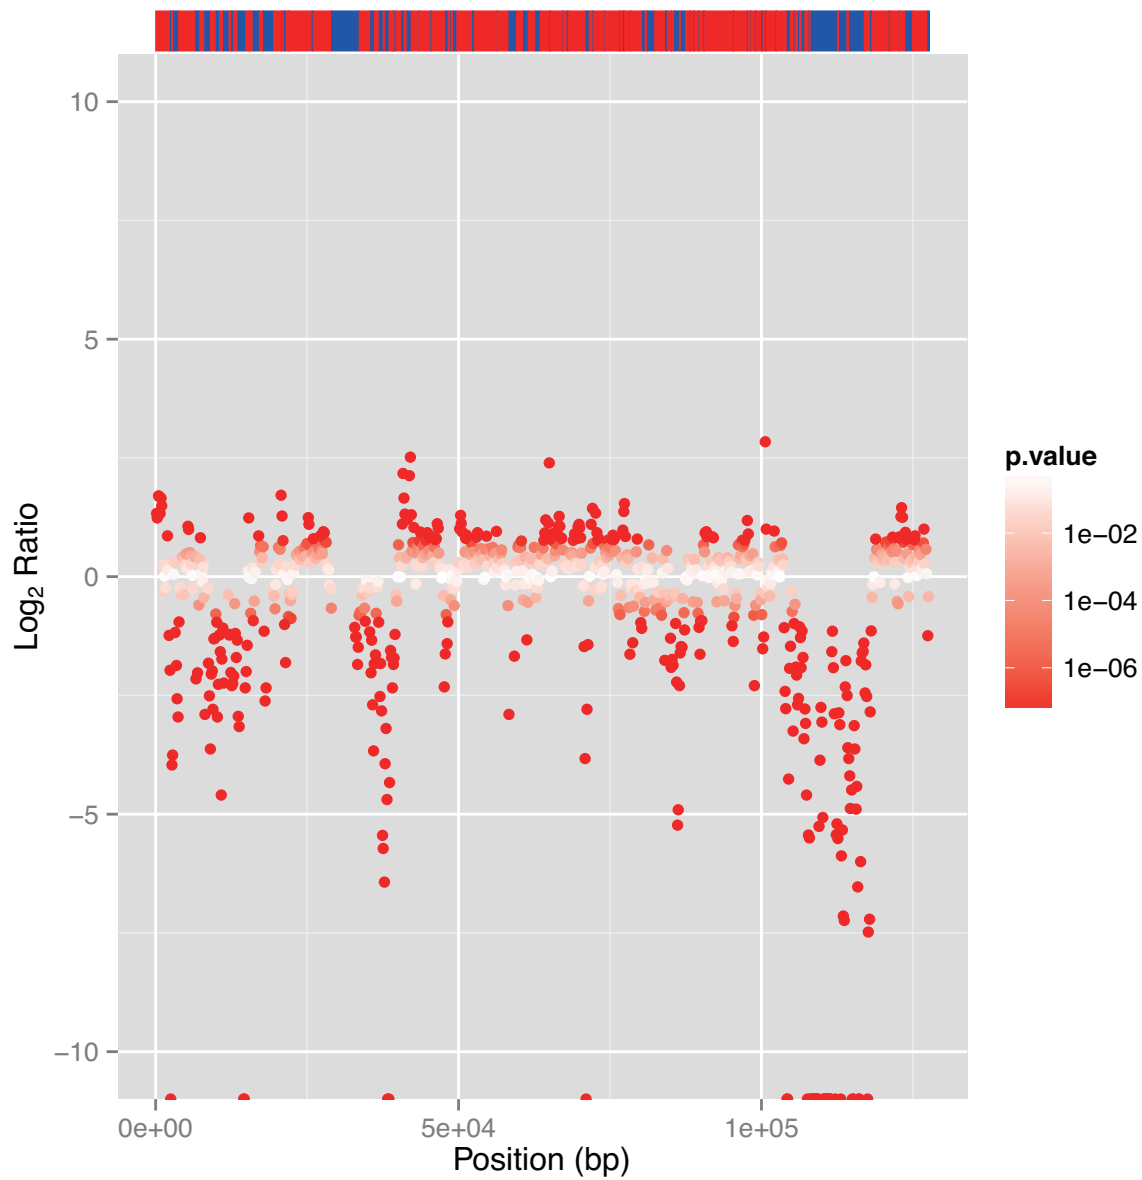

# ltr\_sc000810.1

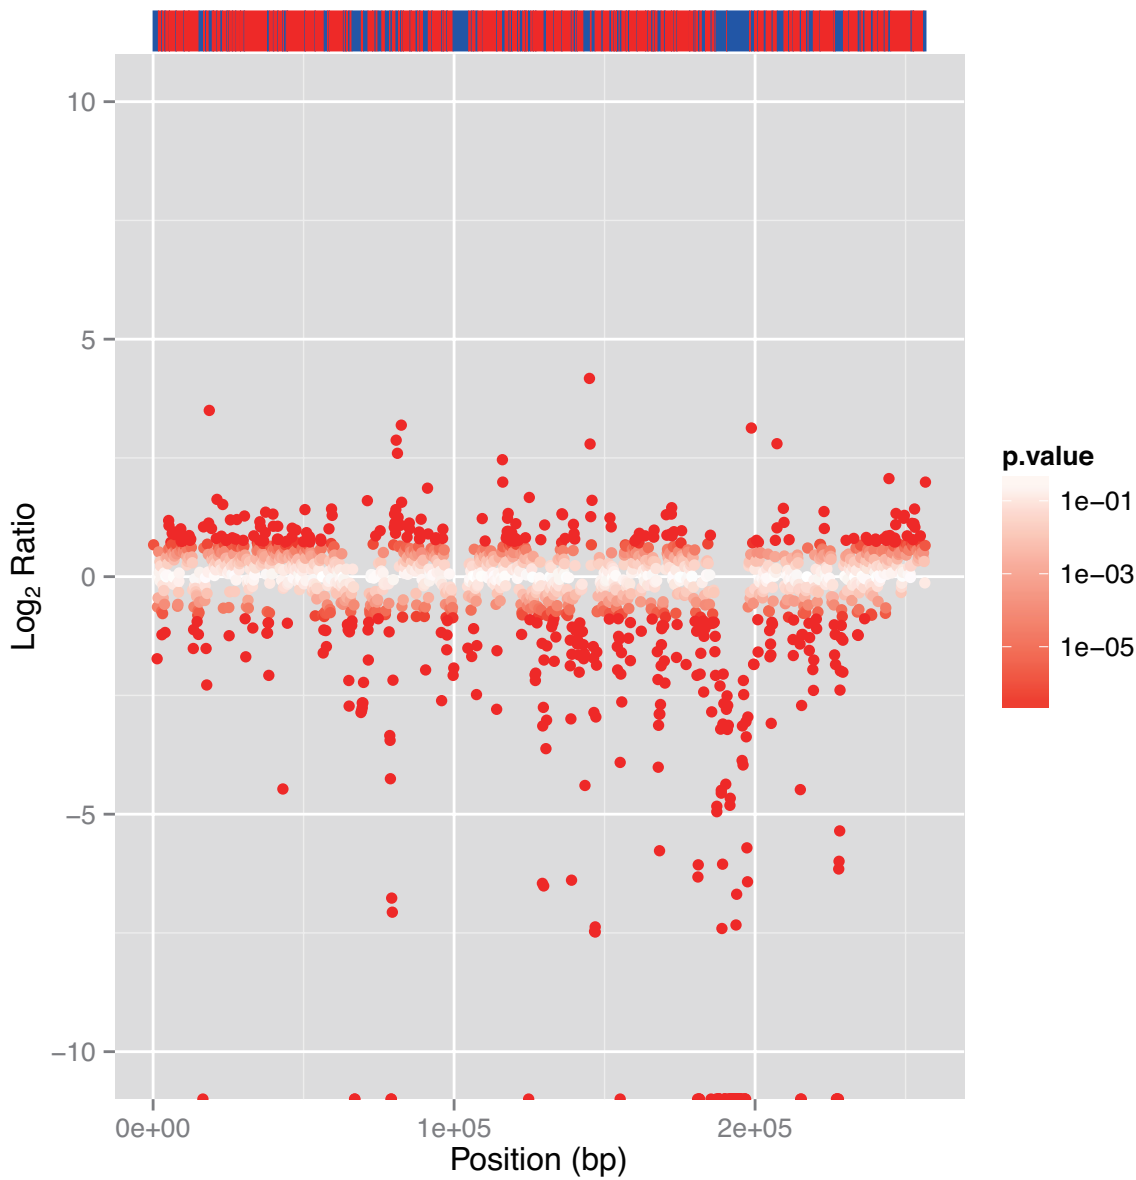

ltr\_sc000954.1

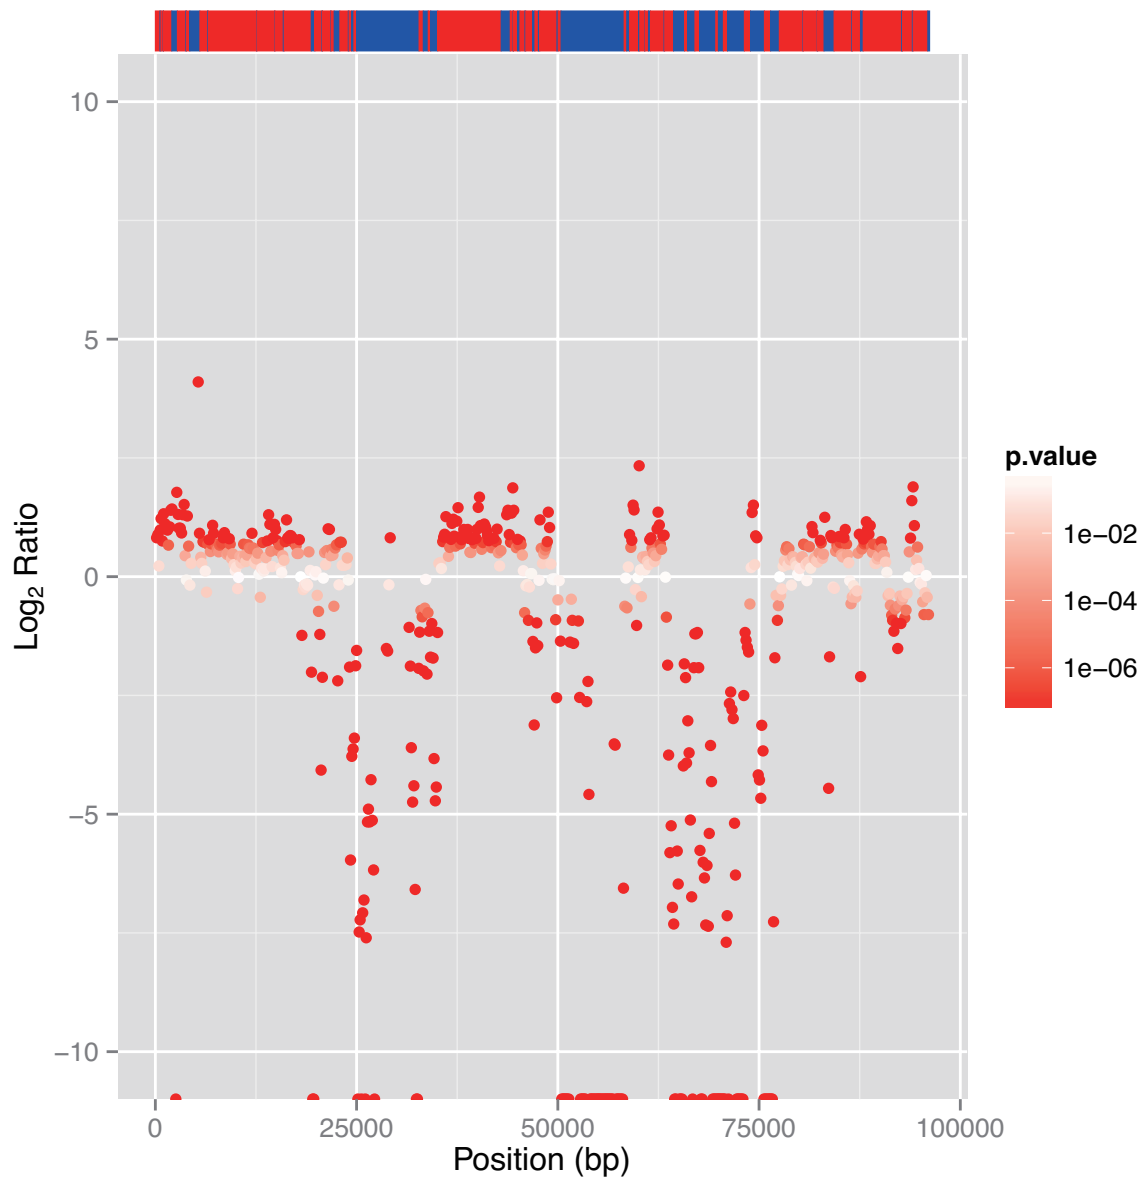

# ltr\_sc001010.1

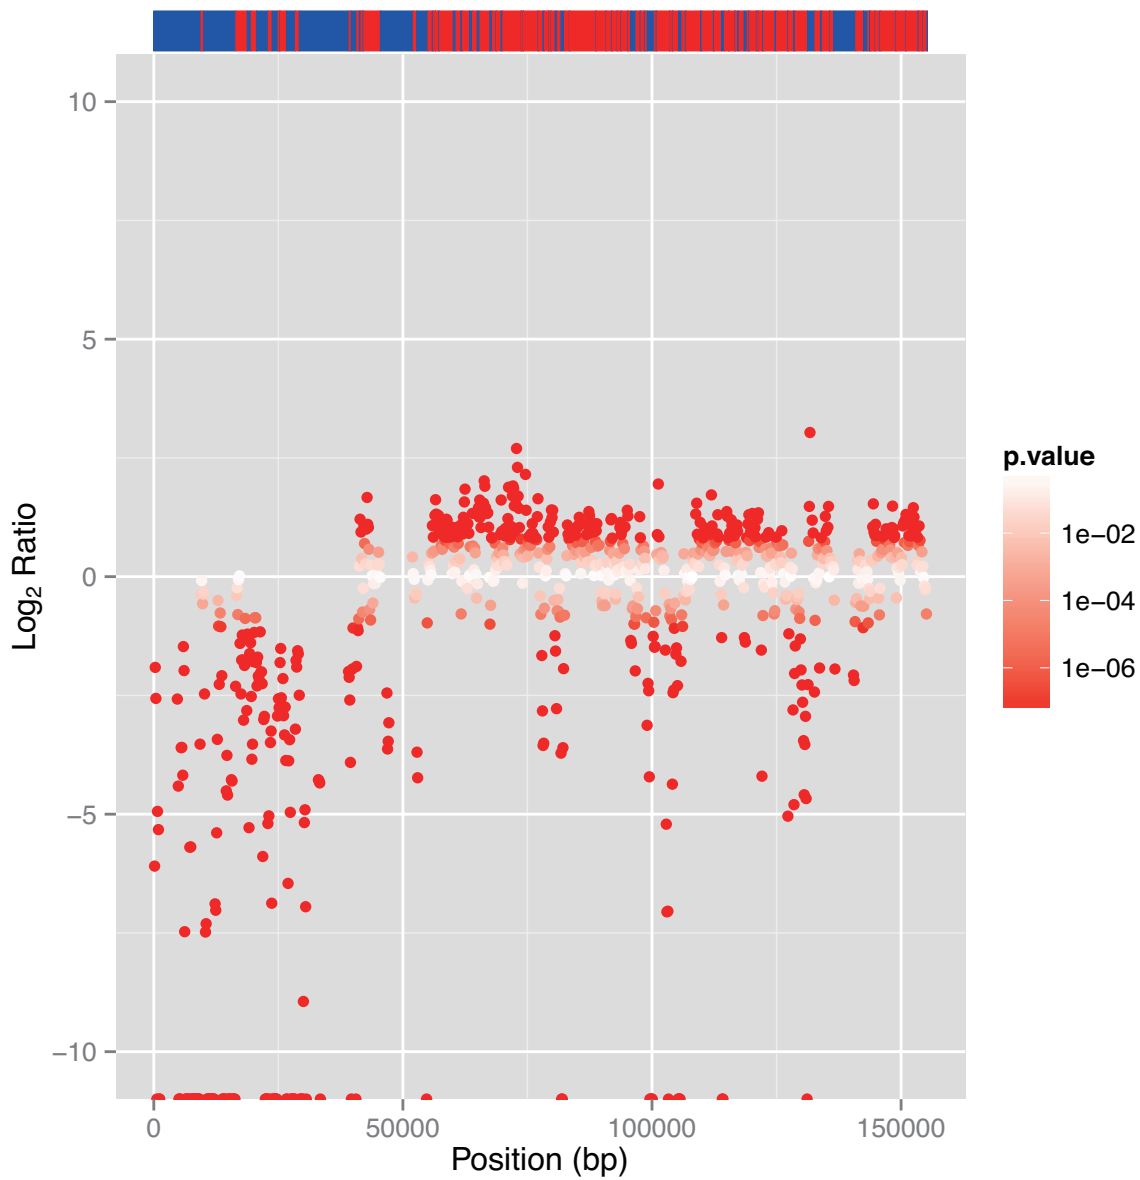

ltr\_sc001015.1

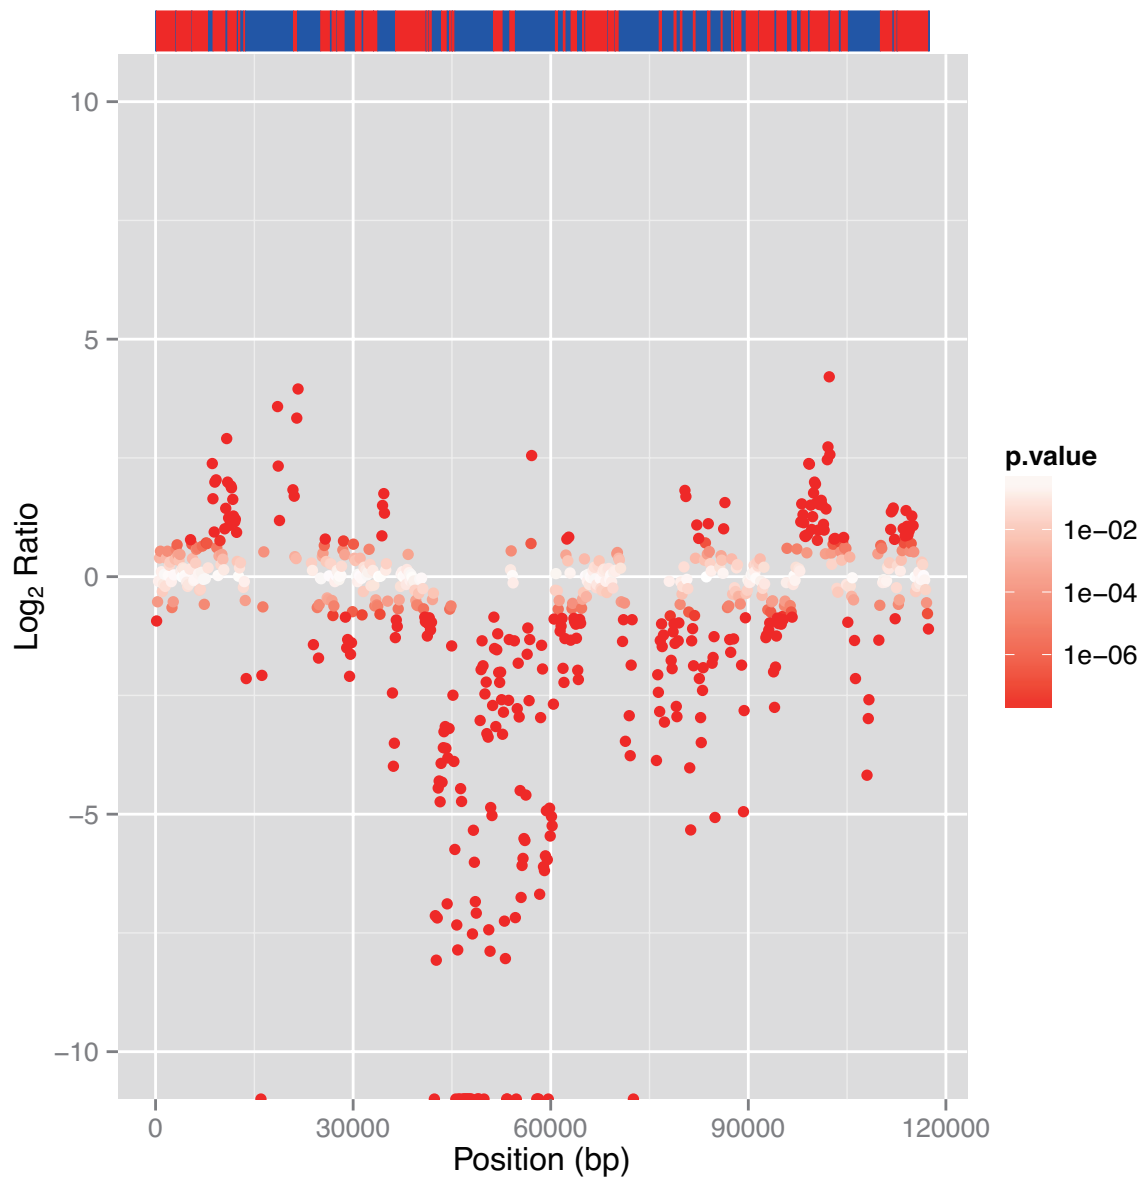

ltr\_sc001178.1

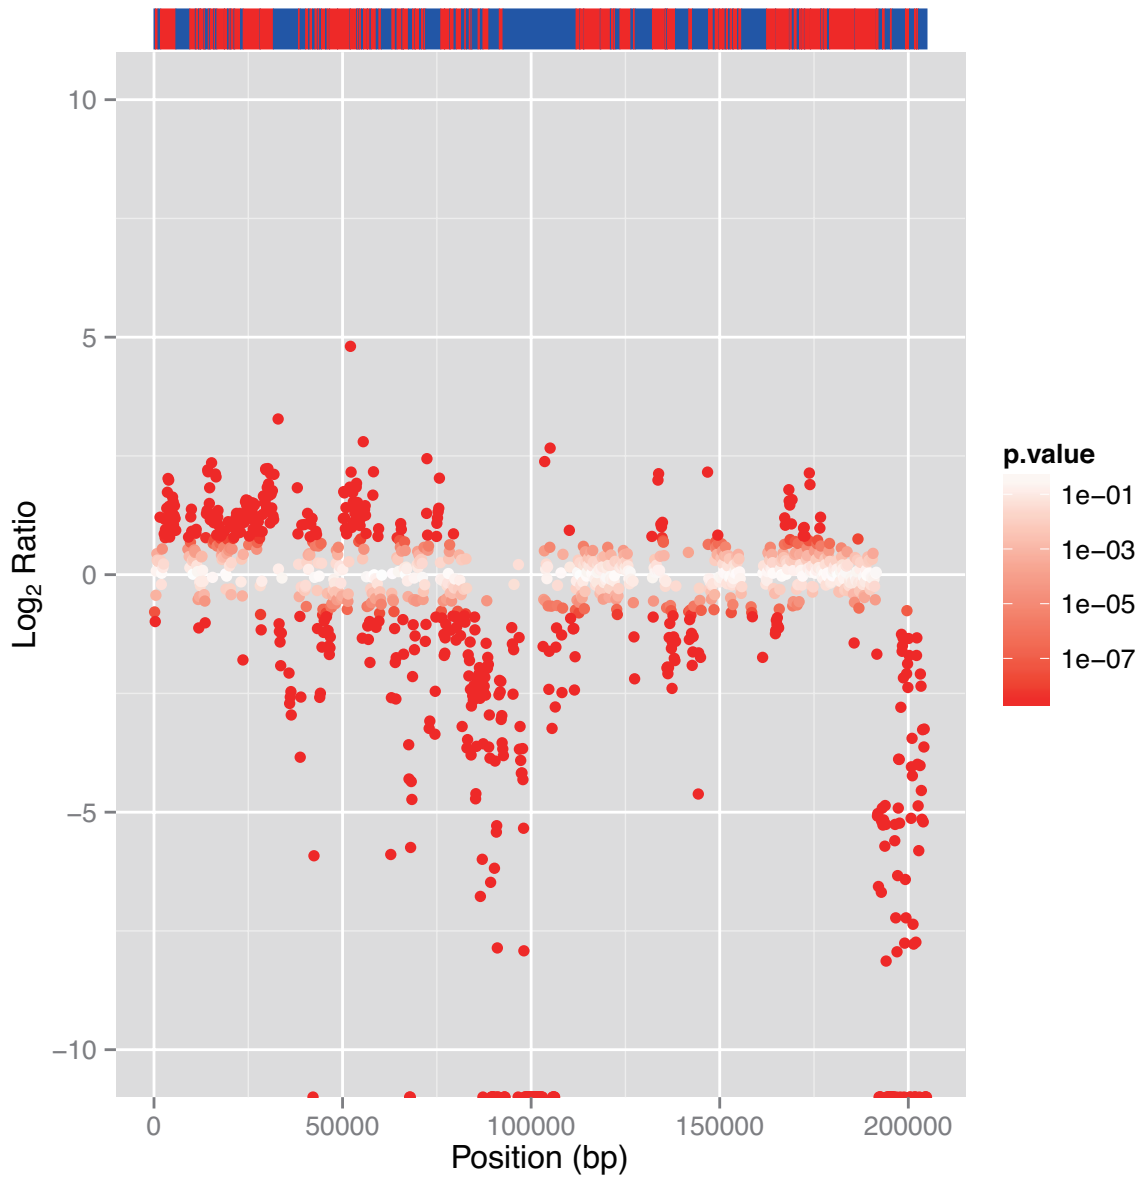

ltr\_sc001381.1

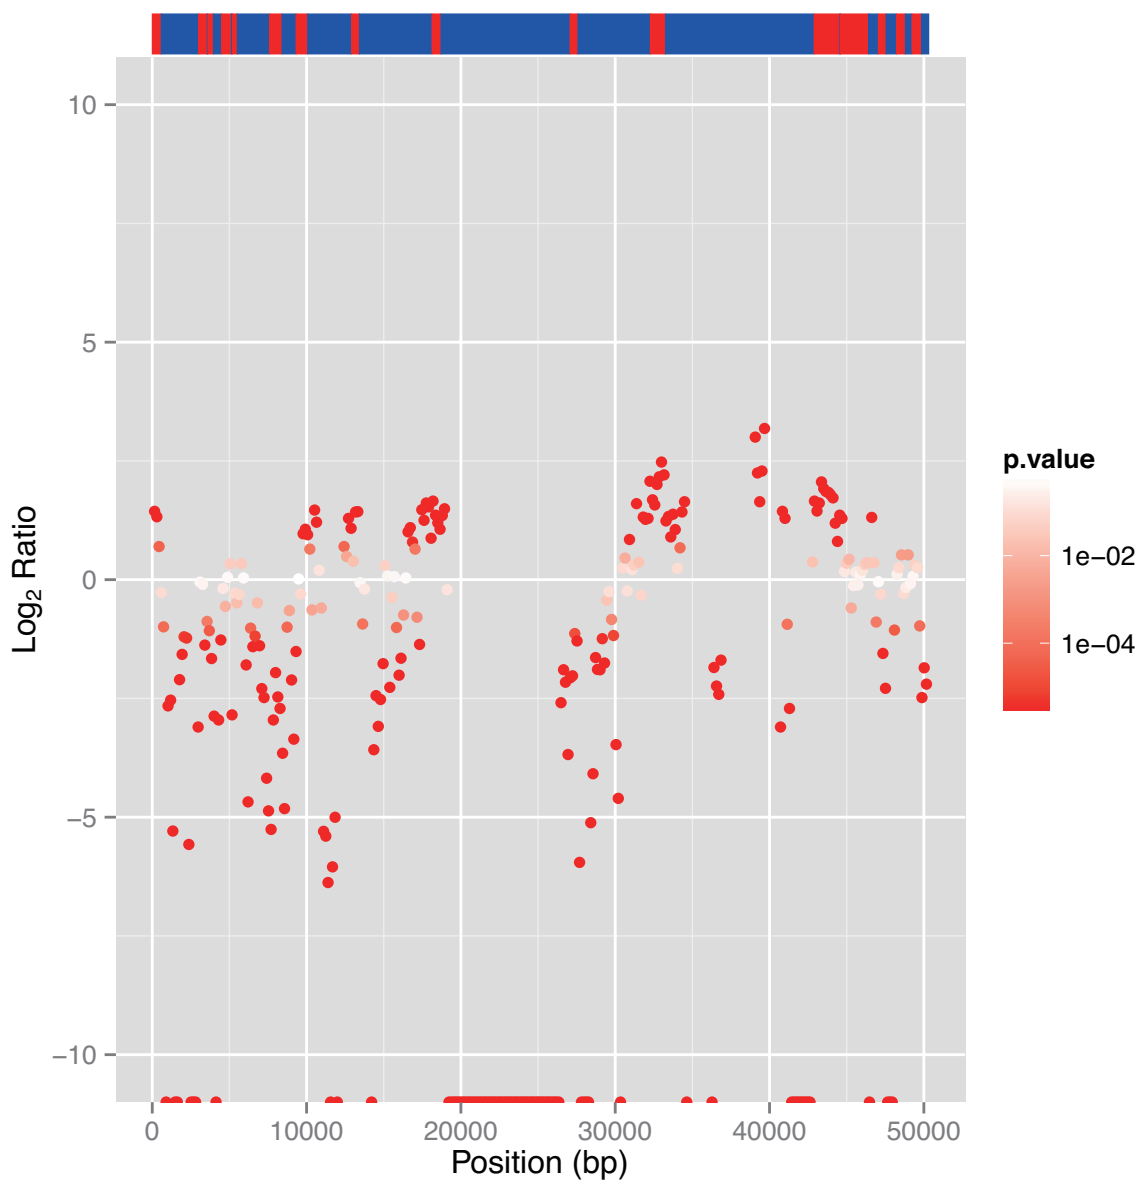

# ltr\_sc001410.1

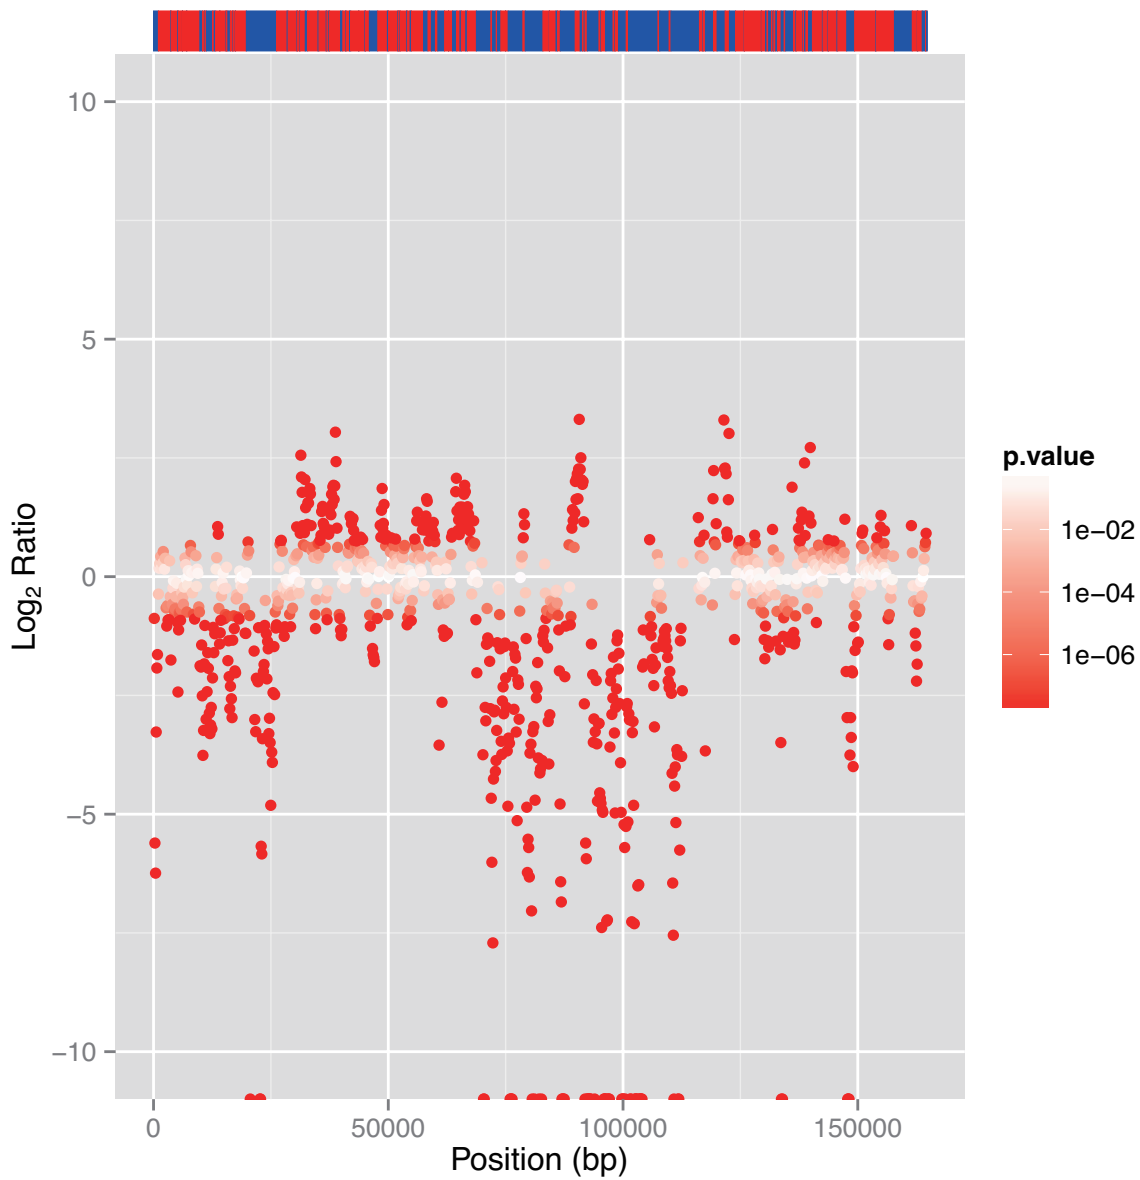



# ltr\_sc001422.1

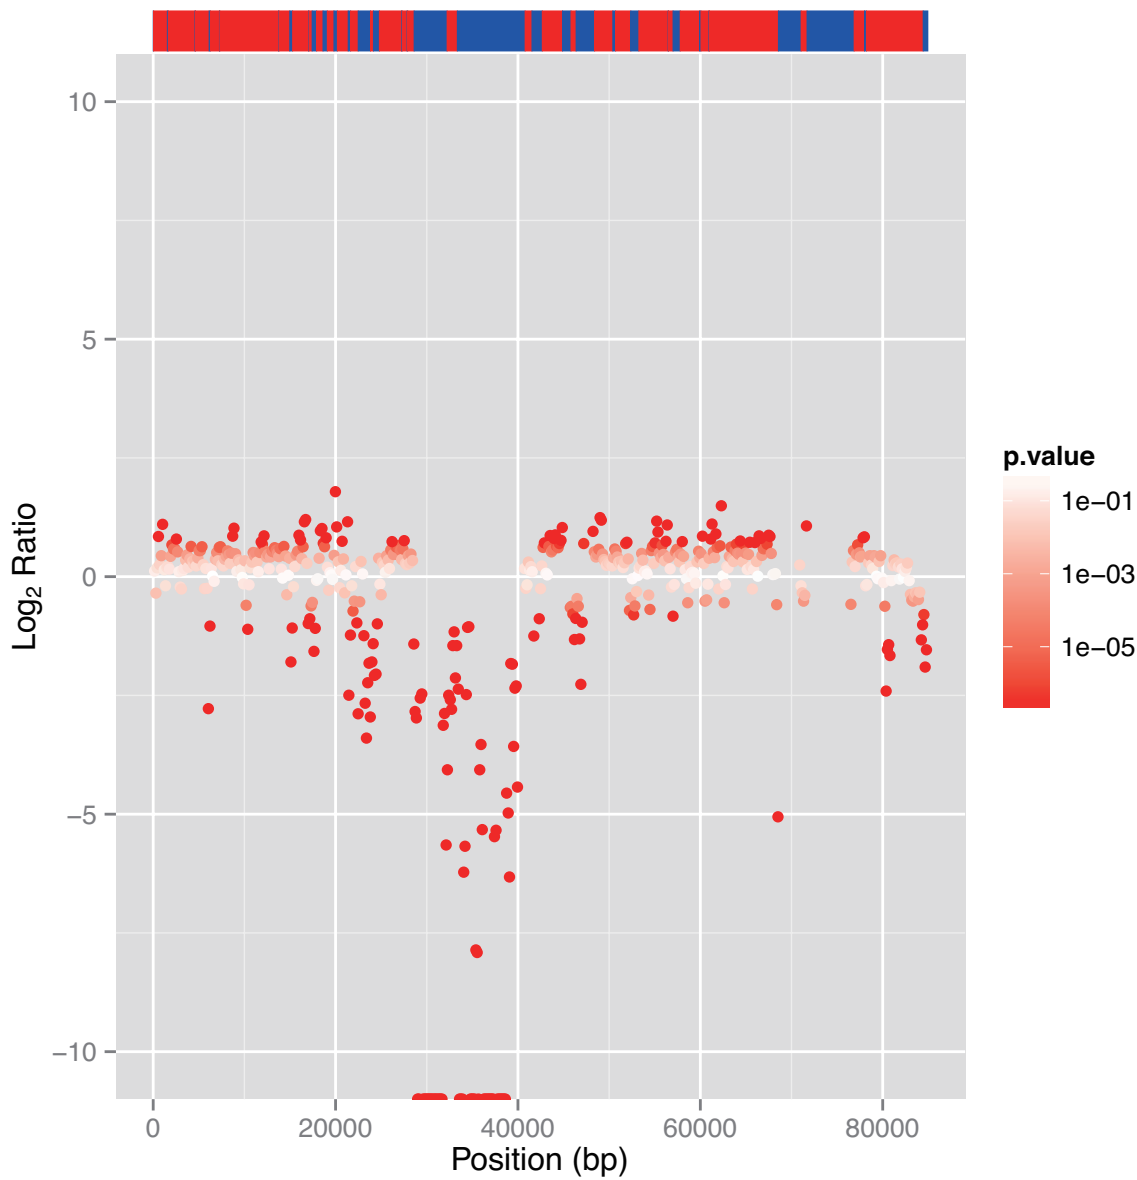

ltr\_sc001435.1

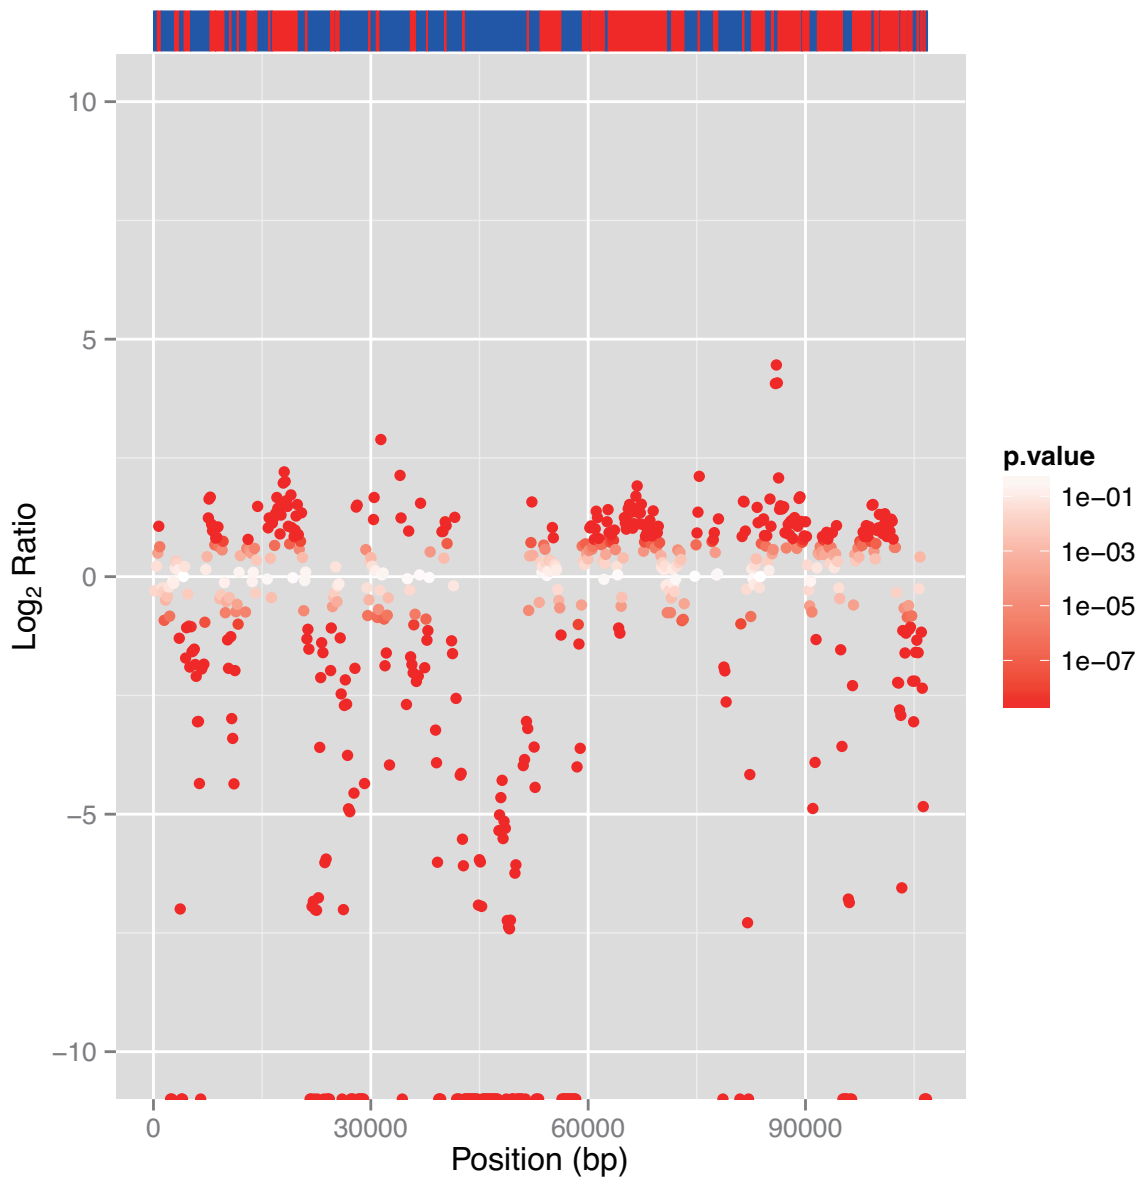

ltr\_sc001463.1

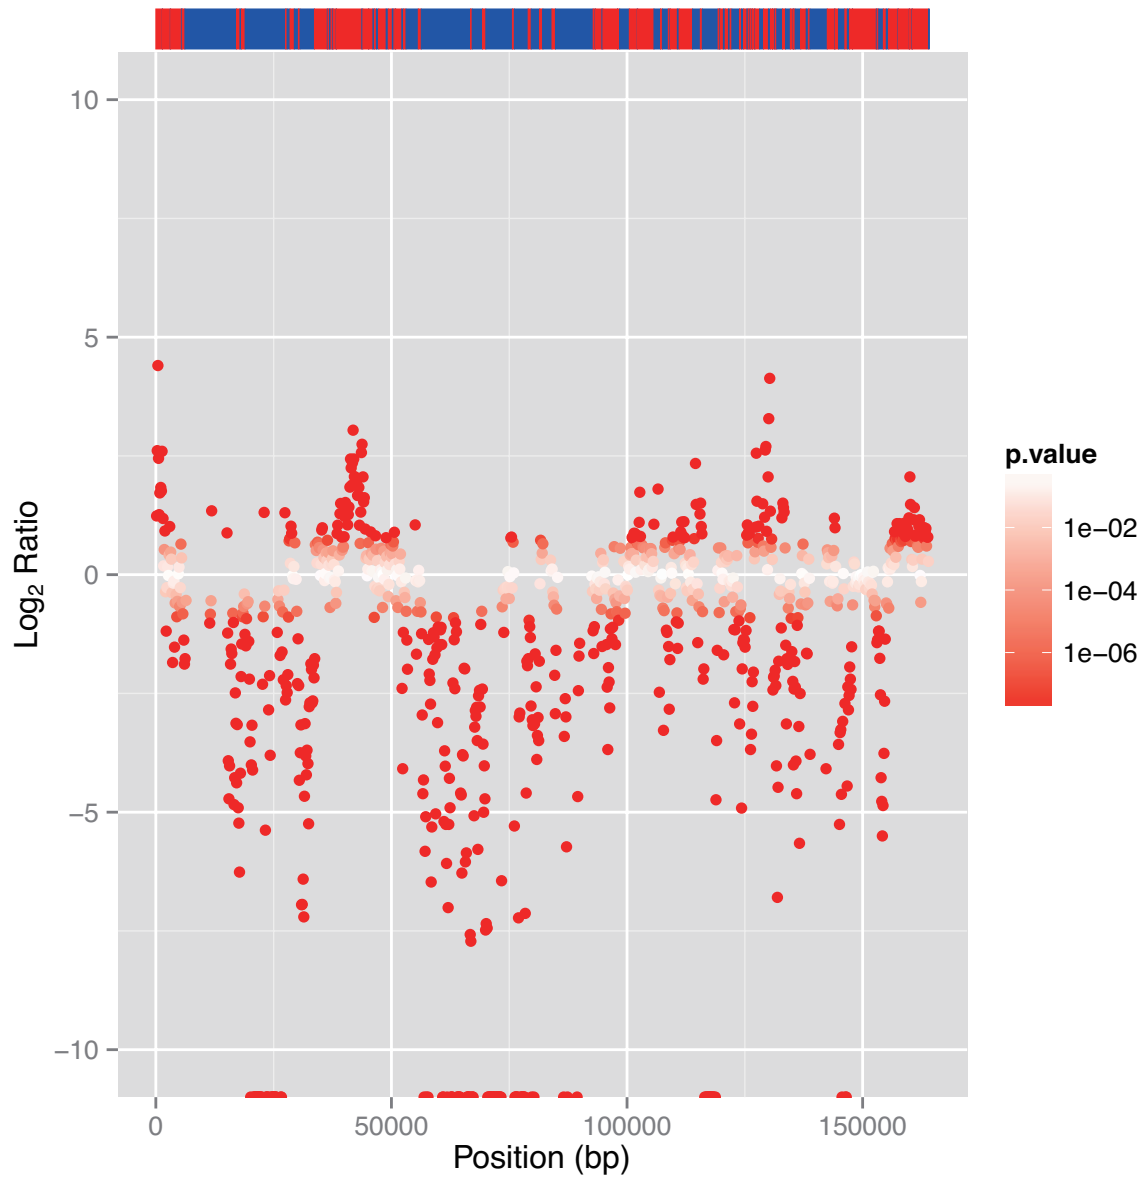

ltr\_sc001743.1

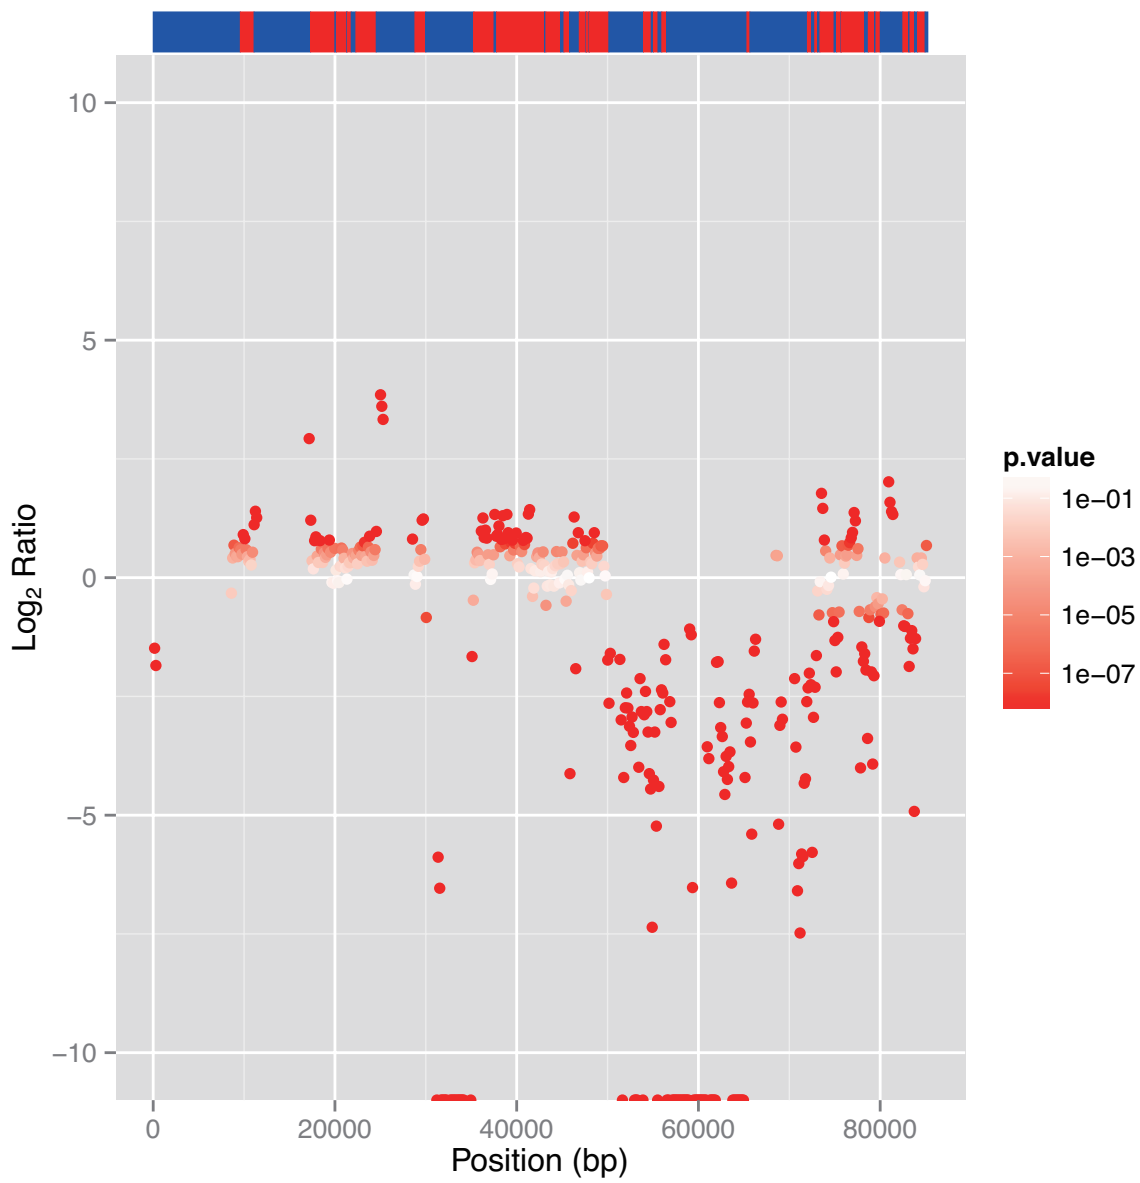

ltr\_sc001797.1

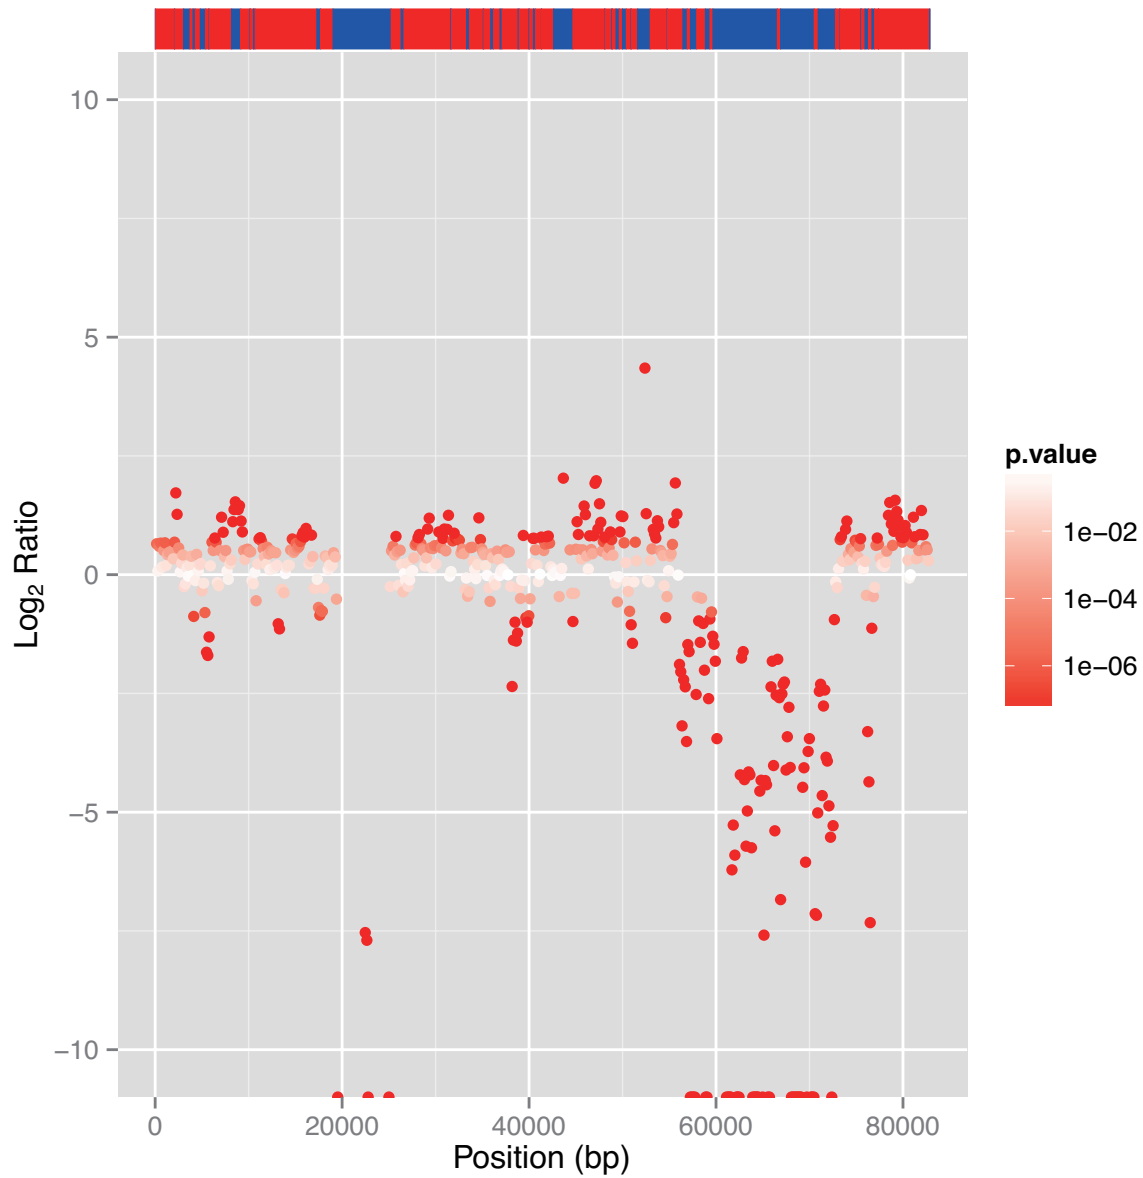

# ltr\_sc001815.1

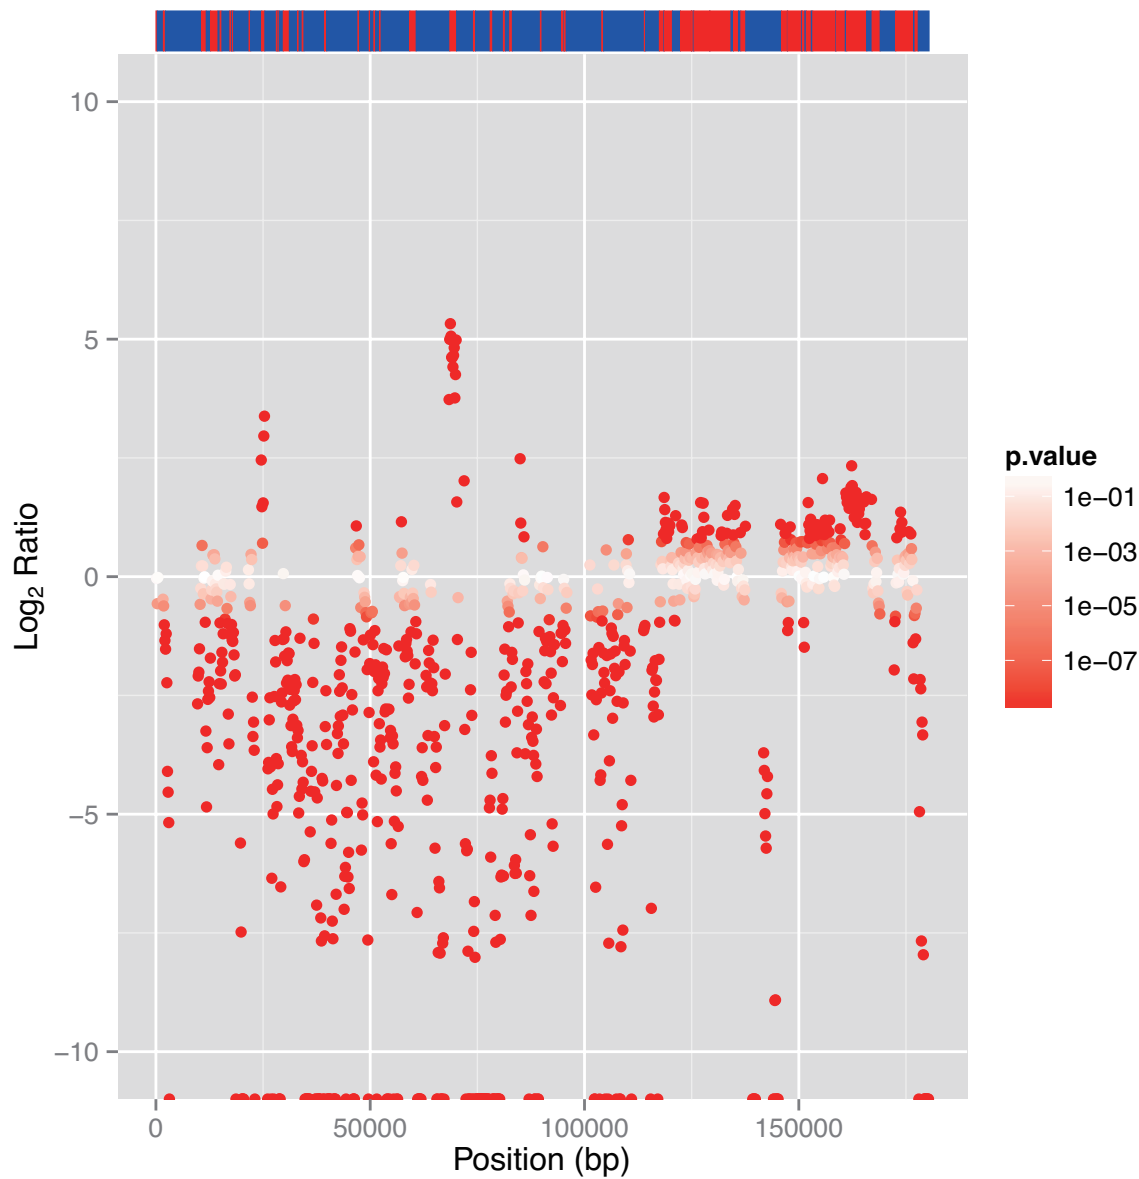

ltr\_sc001925.1

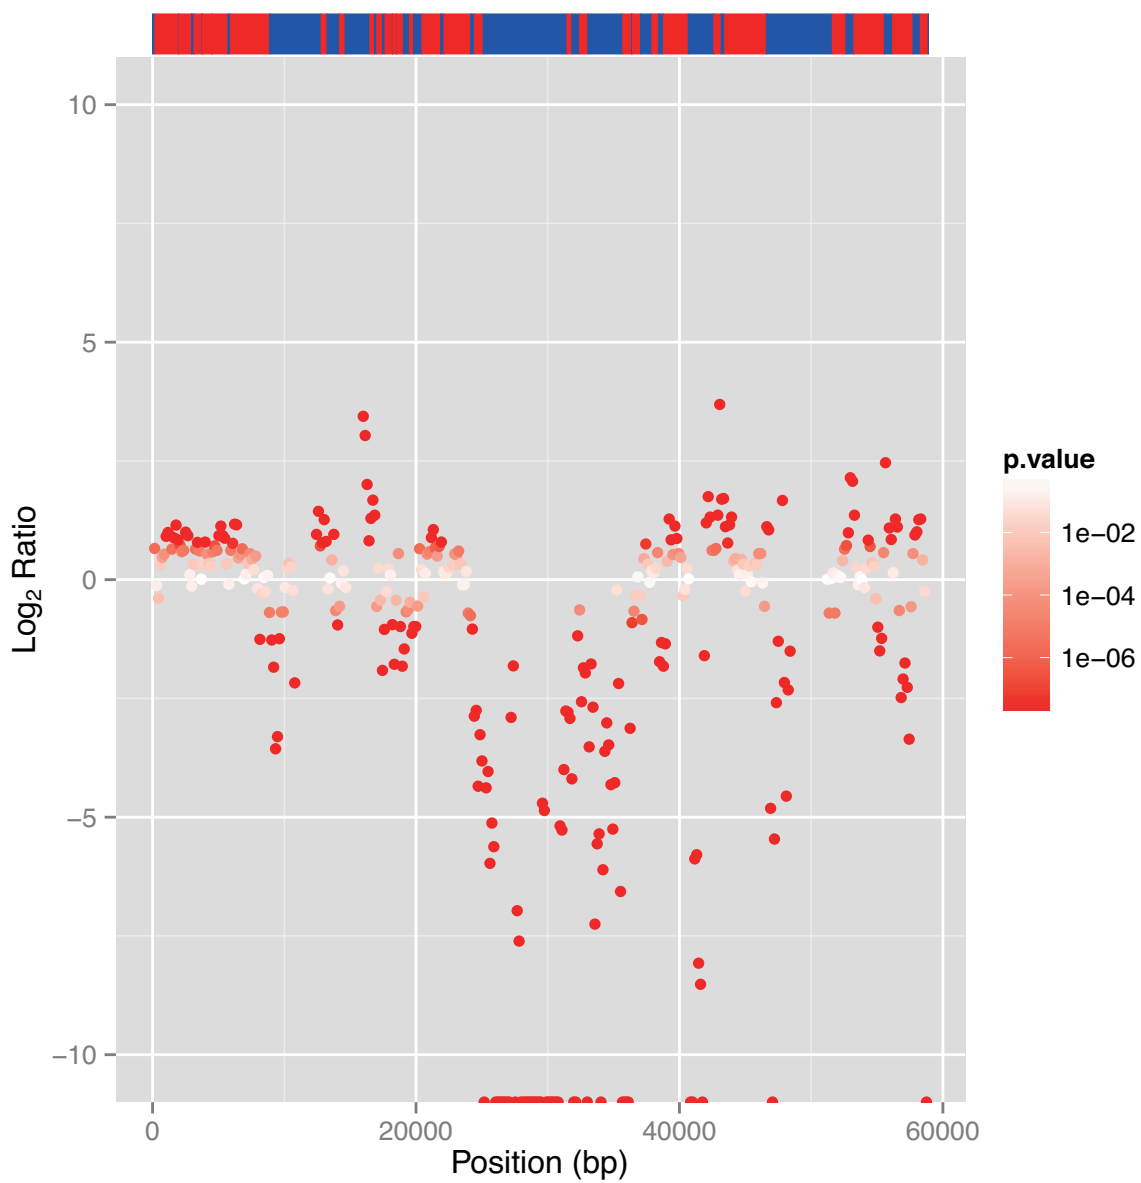

ltr\_sc002133.1

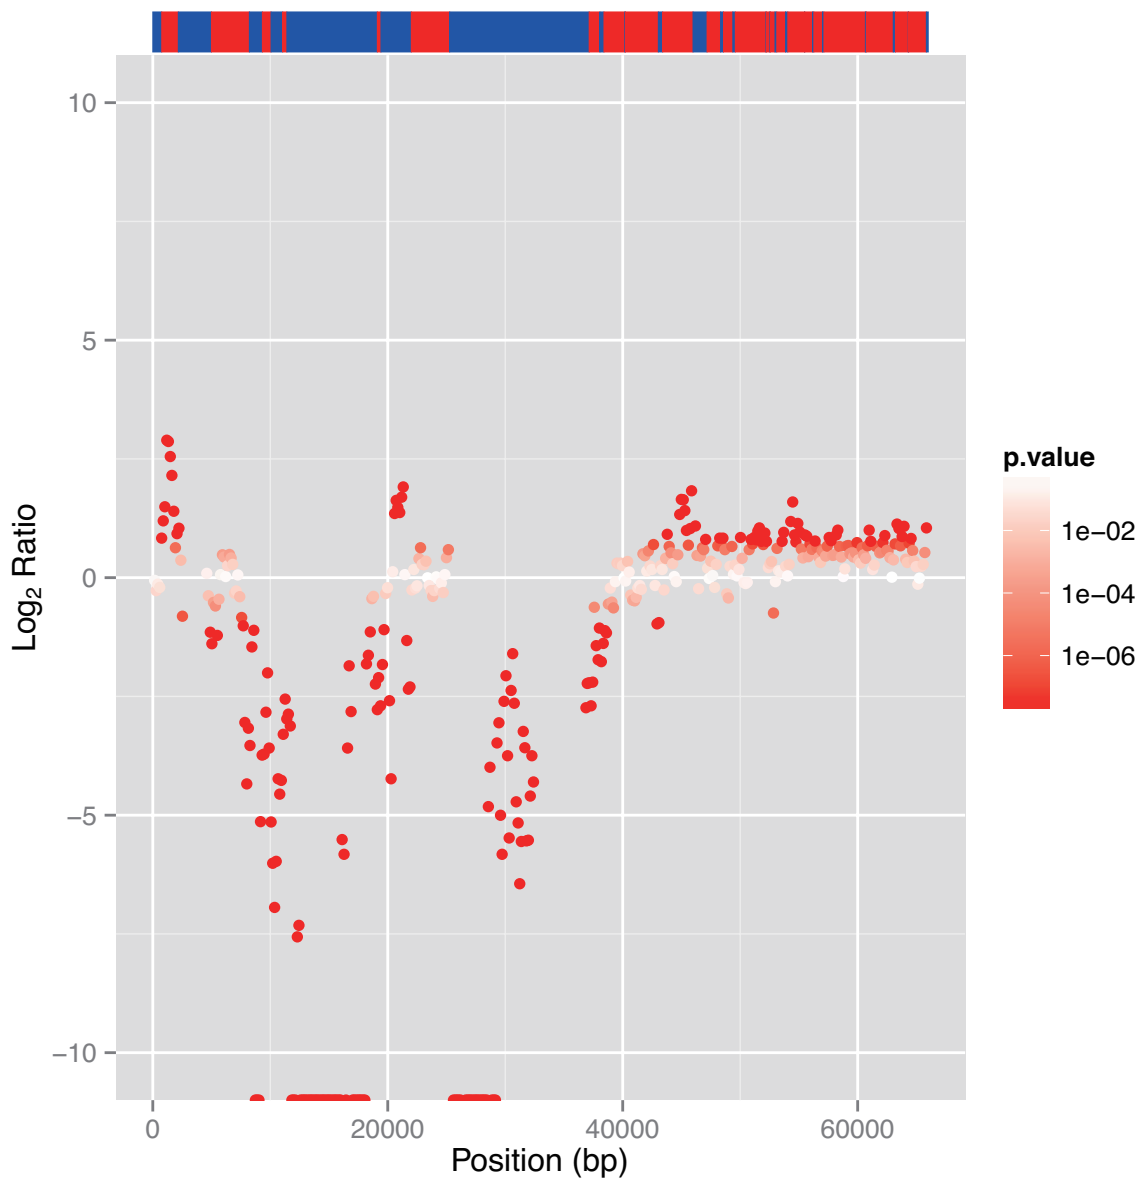



ltr\_sc002258.1

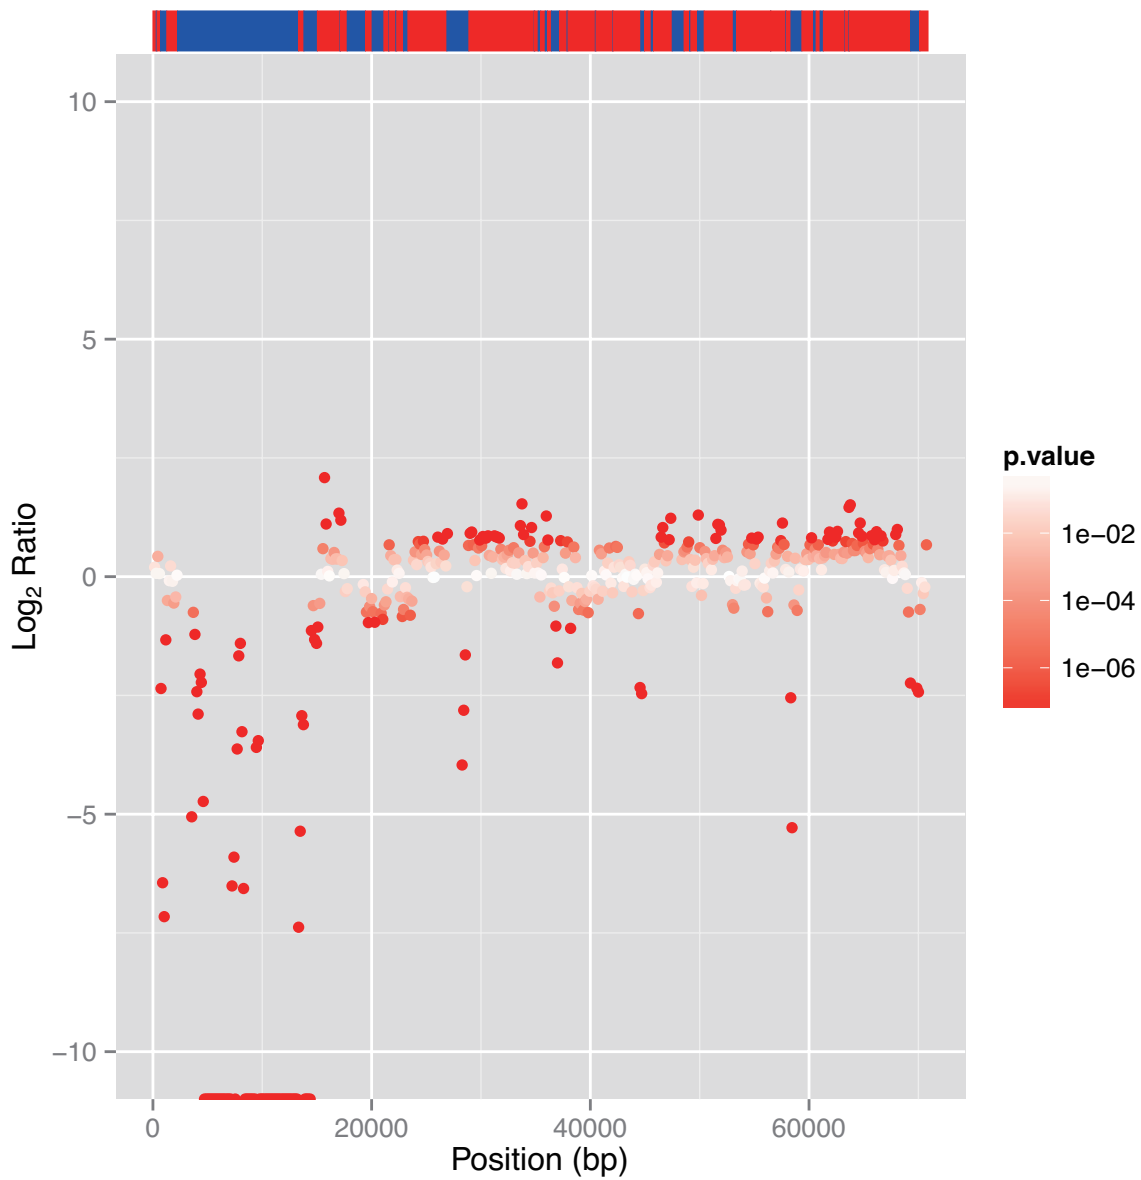

ltr\_sc002386.1

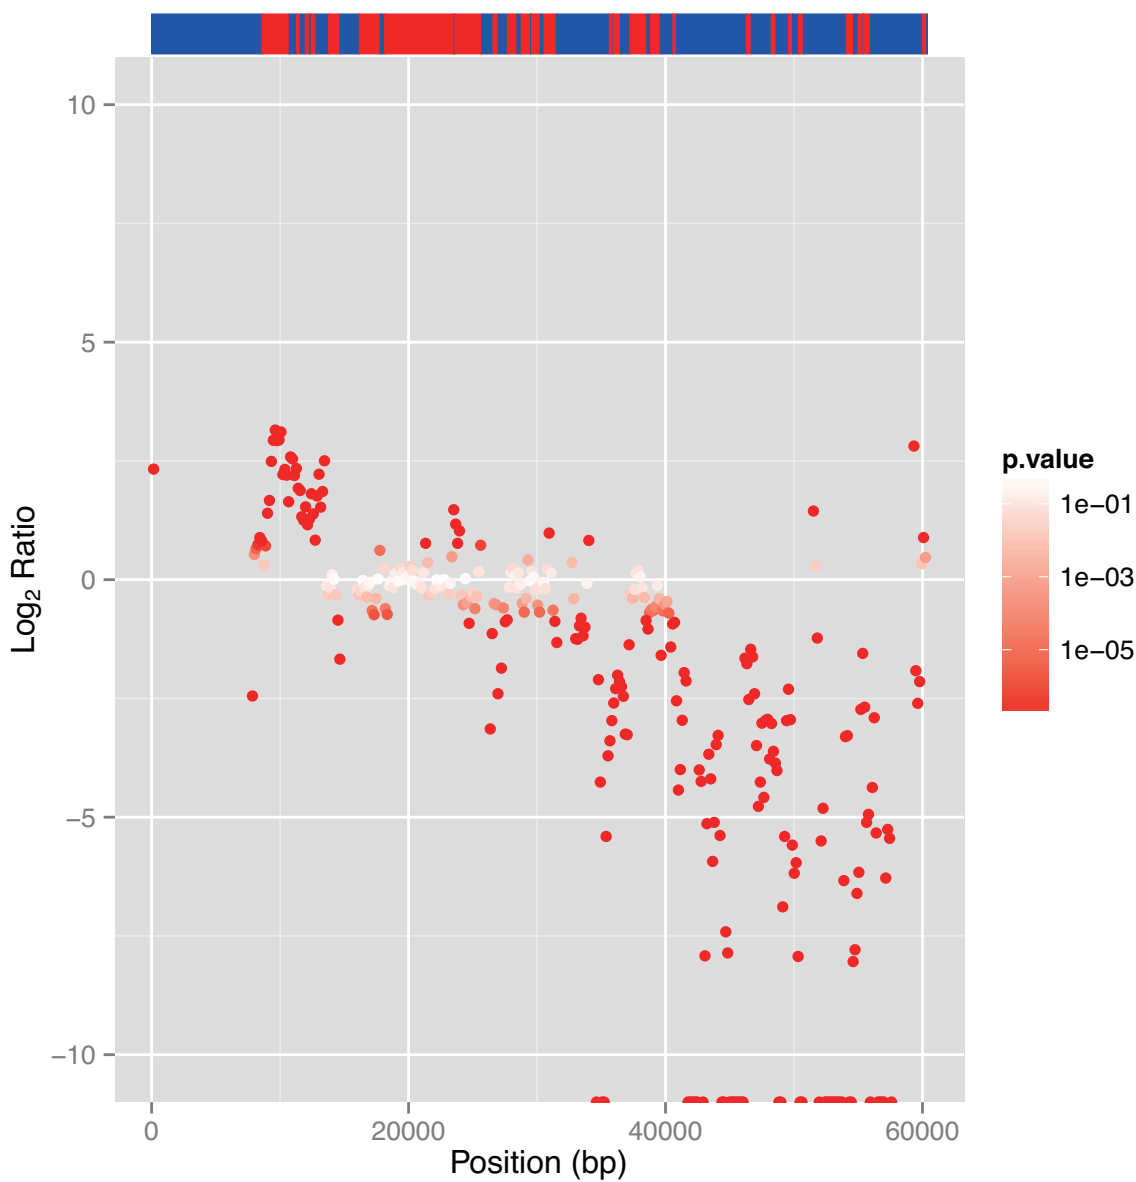

# ltr\_sc002510.1

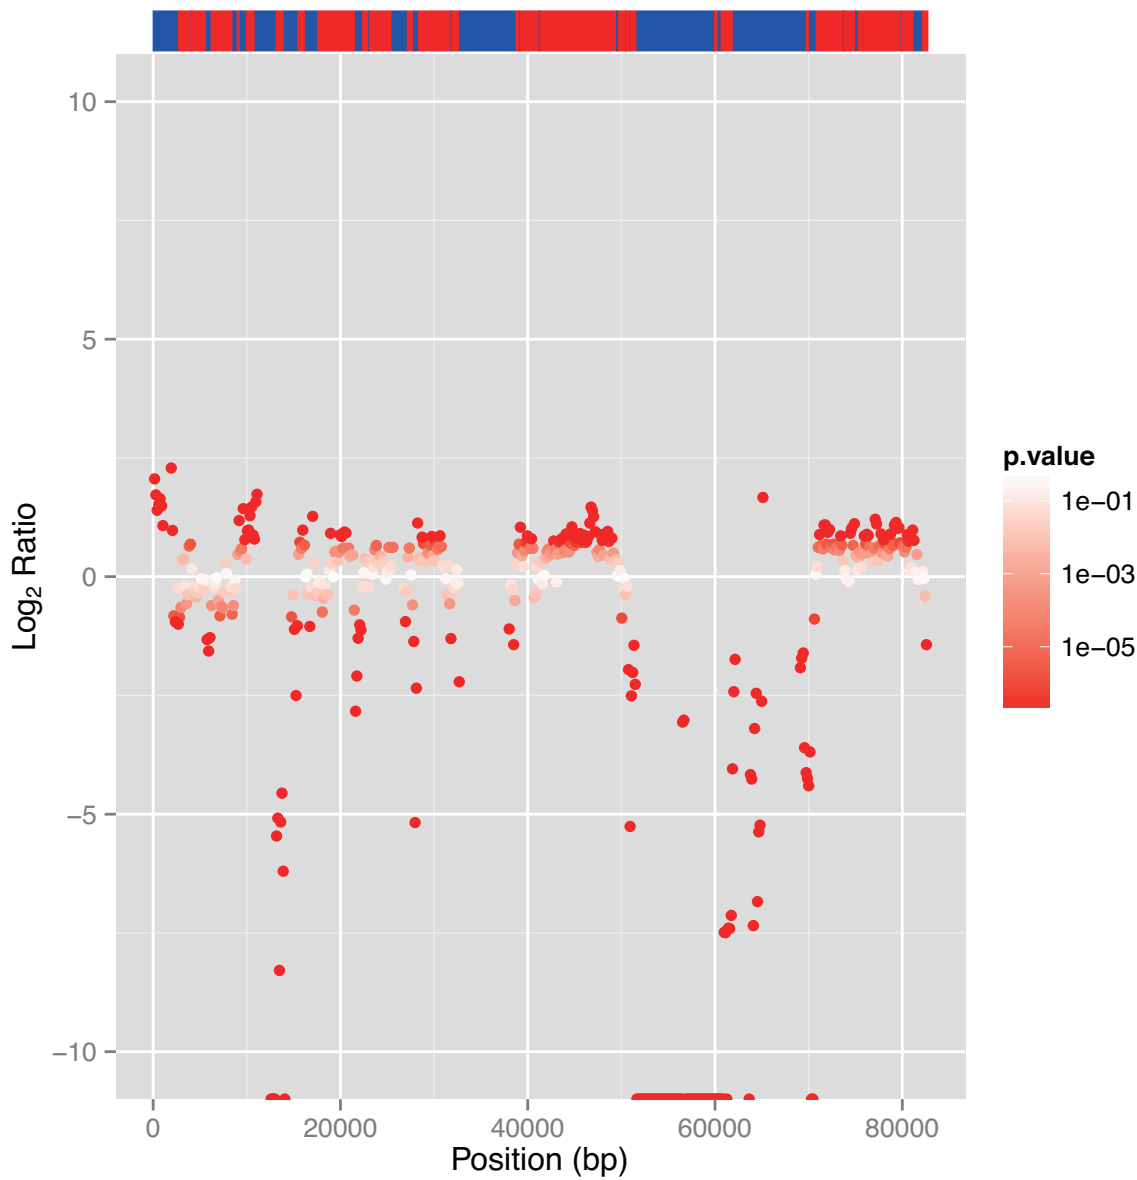

ltr\_sc002576.1

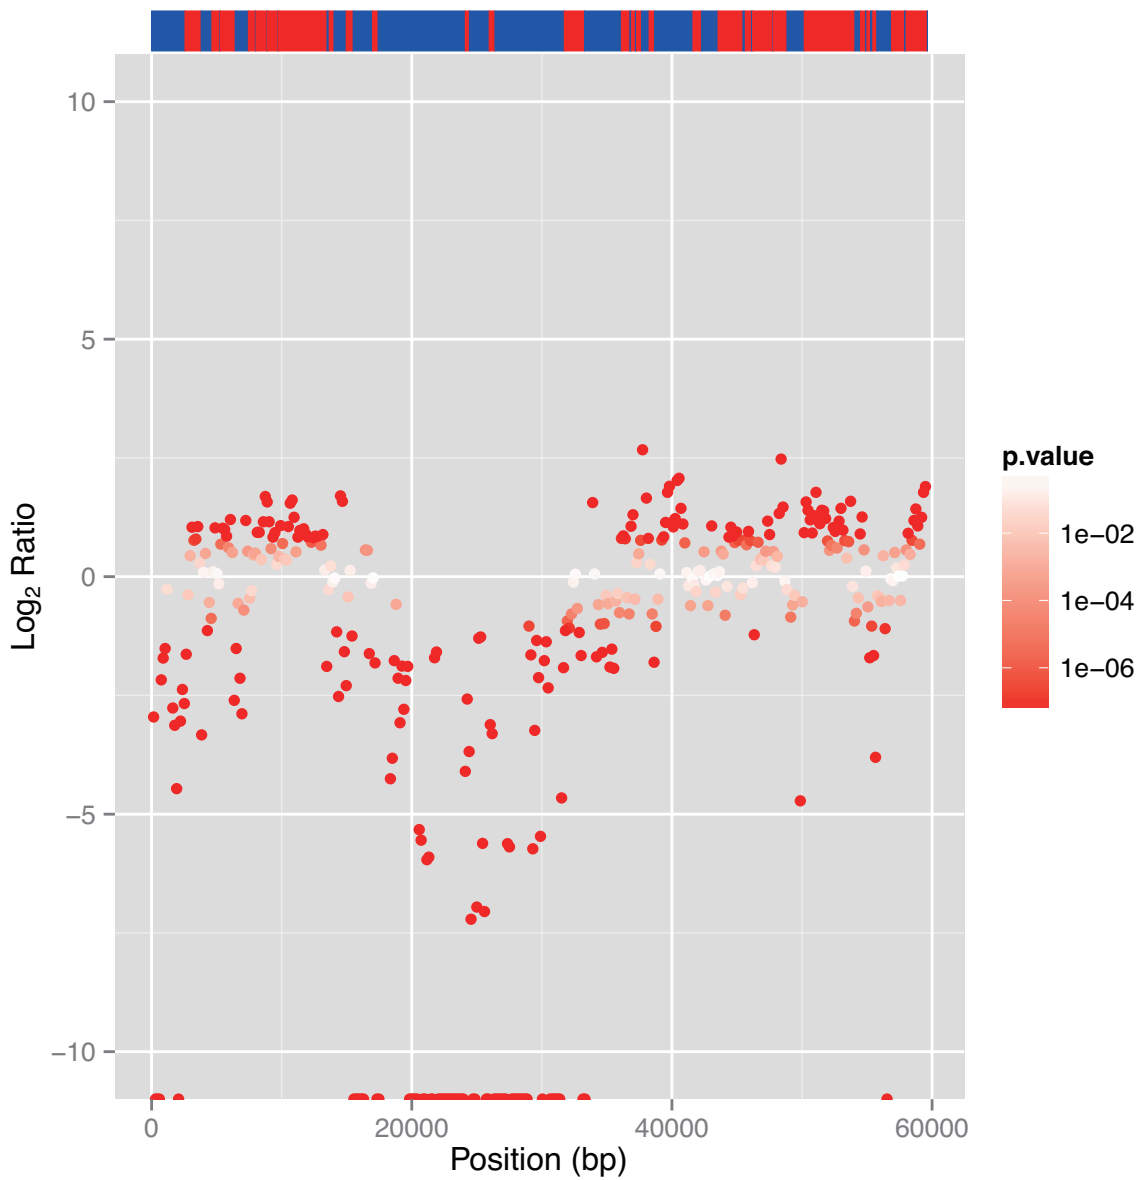

# ltr\_sc002719.1

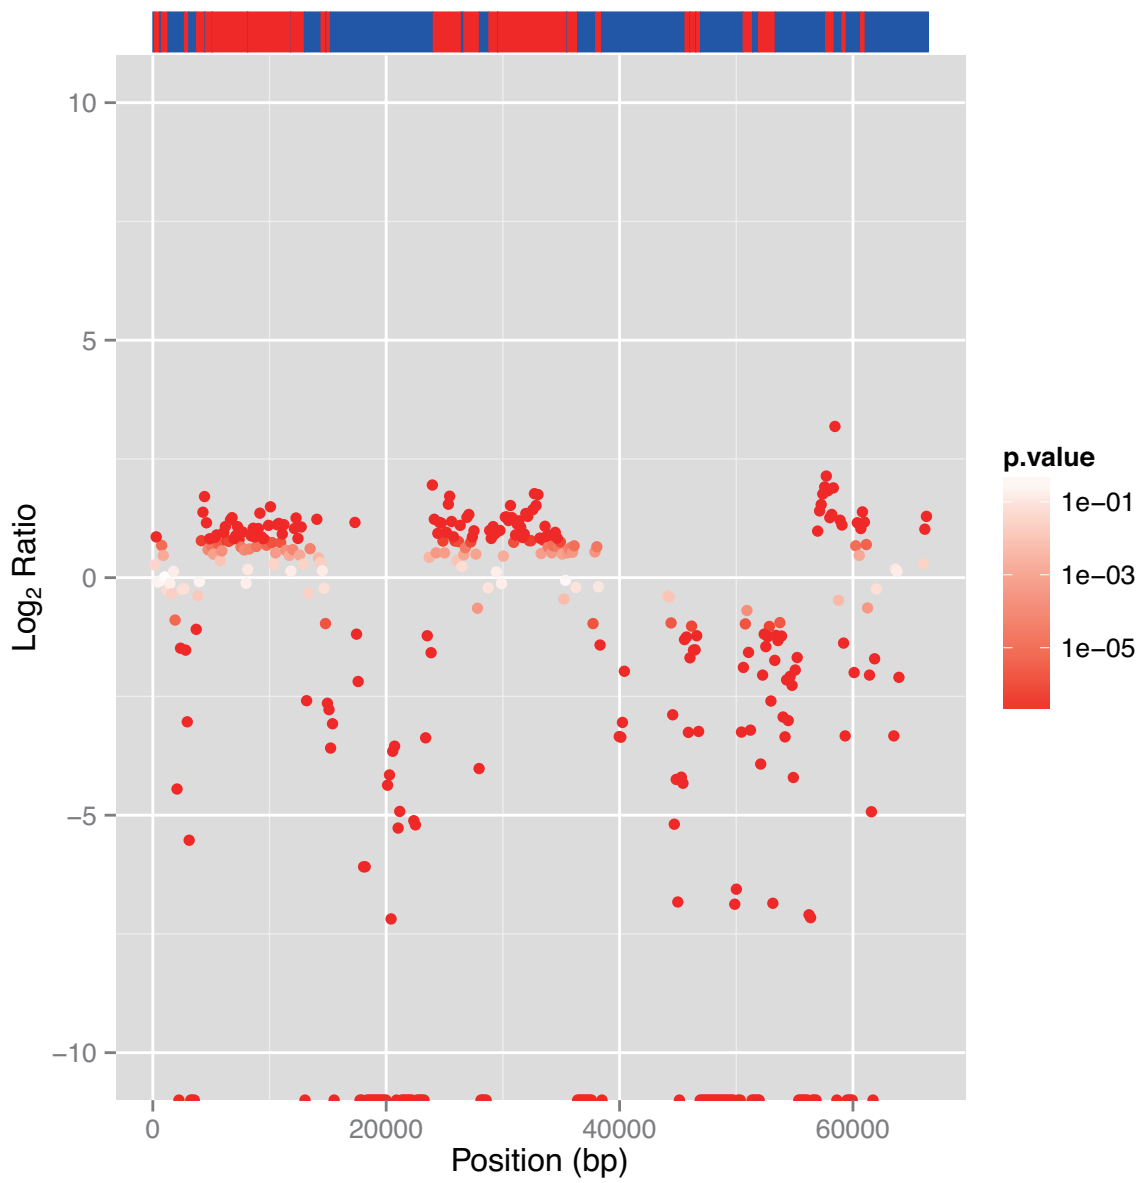

Supplement: supp_dsv002_dsv002supp_fig10.pdf [file supp_dsv002_dsv002supp_fig10.pdf]
